# Supplementary material for: Potential drug targets for multiple sclerosis identified through Mendelian randomization analysis
Source: PubMed Central journal article supplement — Brain. 2023 Mar 2;146(8):3364–72. doi: 10.1093/brain/awad070 (PMC10393411; doi:10.1093/brain/awad070), 2023-03-02
Supplement: awad070_supplementary_data.pdf [file awad070_supplementary_data.pdf]

## **Supplemental Material**

**Supplementary Table 1 Genetic instruments of plasma and CSF proteins for MR analysis**

**Supplementary Table 2 Genetic instruments of multiple sclerosis for bidirectional MR**

**Supplementary Table 3 Heterogeneity analysis on proteins with two or more instruments**

**Supplementary Table 4 Previously-reported genome-wide significant association of SNPs as genetic instruments of six potential causal proteins**

**Supplementary Table 5 Linkage disequilibrium  $r^2$  among SNPs of six potential causal proteins**

**Supplementary Table 6 Thirteen medications for multiple sclerosis and their corresponding drug targets**

**Supplementary Table 7 Current medications targeting six potential causal proteins**

**Supplementary Table 8 Genetic instruments of six potential causal proteins for external validation**

**Supplementary Fig. 1 Bidirectional MR analysis for multiple sclerosis on levels of six potential causal proteins**

OR stood for the odds ratios for per standard deviation (SD) increase in plasma protein levels and per 10-fold increase in CSF protein levels as MS risk increased.

**Supplementary Fig. 2 Bayesian colocalization analysis of six potential causal proteins and multiple sclerosis**

Colocalization analysis of plasma proteins for FCRL3 (A), TYMP (B) and AHSB (C), and CSF proteins for MMEL1 (D), SLAMF7 (E), and CD5L (F), respectively. Diamond purple points represented the SNP that with the minimal sum of *P* value in corresponded protein GWAS and multiple sclerosis GWAS.

**Supplementary Fig. 3 Comparison analysis of MR estimates between plasma proteome and CSF proteome**

(A) All 66 overlapping proteins in plasma and CSF were used to perform correlation analysis. The horizontal and vertical gray line represented the 95% confidence interval of MR estimates in main analysis. The Spearman correlation coefficient was -0.037 (95% CI: -0.305, 0.234); (B) With different cutoff for *P* value to include MR estimates, Spearman correlation coefficient was calculated. The numbers on the left side of the black point represented the numbers of overlapping proteins correspondingly.

**Supplementary Fig. 4 Protein-protein interaction network among the suggestive causal proteins ( $P < 0.05$ ) and current multiple sclerosis medications targets**

Red solid circles represented plasma proteins, blue solid circles represented represented CSF proteins, while green solid circles represented current MS medication targets. The largest solid circles highlighted six potential causal proteins, including FCRL3, TYMP, AHSB, MMEL1, SLAMF7, and CD5L.

**Supplementary Fig. 5 Protein-protein causal relationship among six potential causal proteins**

Red solid circles represented plasma proteins, while blue solid circles represented represented CSF proteins. Unit for plasma and CSF proteins were per standard deviation (SD) increase and per 10-fold increase.

**Supplementary Fig. 6 Protein-protein colocalization among six potential causal proteins**

Numbers in figure represented posterior probability of two proteins colocalized ( $PPH_4$ ).  $PPH_4$  greater than 0.8 strongly indicated colocalization. Red solid circles represented plasma proteins, while blue solid circles represented CSF proteins

**Supplementary Table 1 Genetic instruments of plasma and CSF proteins for MR analysis**

| tissue | protein  | UniProt ID                       | SNP         | chr | pos       | effect allele | other allele | eaf   | beta   | se    | pval      | author |
|--------|----------|----------------------------------|-------------|-----|-----------|---------------|--------------|-------|--------|-------|-----------|--------|
| Plasma | ACP1     | A0A140VK37;<br>P24666;Q59EH<br>3 | rs11553746  | 2   | 272203    | T             | C            | 0.325 | 1.237  | 0.026 | 1E-200    | Suhre  |
| Plasma | ACP5     | A0A024R7F8;P<br>13686            | rs79061565  | 19  | 11698659  | G             | C            | 0.123 | -0.485 | 0.036 | 1.6E-40   | Sun    |
| Plasma | ADA2     | Q9NZK5;B4E3<br>Q4;A0A087X0I<br>3 | rs2231495   | 22  | 17669306  | C             | T            | 0.333 | -0.879 | 0.021 | 1E-200    | Sun    |
| Plasma | ADAM23   | A0A024R3W8;<br>O75077;E7EW<br>D3 | rs1921673   | 2   | 207324282 | G             | A            | 0.685 | 0.432  | 0.026 | 3.2E-64   | Sun    |
| Plasma | ADAMTS13 | Q76LX8                           | rs71503194  | 9   | 136298131 | G             | T            | 0.091 | -0.872 | 0.040 | 4.4E-103  | Sun    |
| Plasma | ADGRE2   | A0JNV7;Q9UH<br>X3                | rs7260110   | 19  | 14501544  | G             | A            | 0.360 | 0.297  | 0.045 | 5.169E-11 | Suhre  |
| Plasma | ADM      | P35318                           | rs2923091   | 11  | 10358145  | A             | G            | 0.662 | -0.204 | 0.025 | 2.28E-16  | Yao    |
| Plasma | AFM      | P43652                           | rs41265665  | 4   | 74361142  | A             | G            | 0.032 | -0.862 | 0.122 | 3.033E-12 | Suhre  |
| Plasma | AGT      | B0ZBE2;B2R5<br>S1;P01019         | rs2493151   | 1   | 230878561 | A             | G            | 0.235 | 0.335  | 0.049 | 2.223E-11 | Suhre  |
| Plasma | AHSG     | P02765                           | rs35094235  | 3   | 186328951 | G             | T            | 0.731 | 0.625  | 0.026 | 2E-132    | Sun    |
| Plasma | AKR1A1   | P14550;V9HWI<br>0                | rs72688441  | 1   | 46051053  | A             | G            | 0.059 | -1.180 | 0.049 | 1.2E-126  | Sun    |
| Plasma | AKR1B1   | A0A024R7A8;<br>P15121            | rs2229542   | 7   | 134135621 | C             | T            | 0.014 | -0.819 | 0.105 | 4.7E-15   | Sun    |
| Plasma | AKR1C1   | Q04828                           | rs145648894 | 10  | 5009739   | G             | T            | 0.111 | 0.389  | 0.039 | 3.8E-23   | Sun    |
| Plasma | ALCAM    | Q13740;B3KN<br>N9                | rs9830049   | 3   | 105284045 | C             | T            | 0.120 | -0.306 | 0.037 | 2.8E-16   | Sun    |
| Plasma | ALDH3A1  | P30838;Q6PKA<br>6;I3L3I9         | rs887241    | 17  | 19645938  | C             | A            | 0.662 | 0.242  | 0.026 | 7.8E-21   | Sun    |
| Plasma | AMY1A    | P04745;Q6NSB<br>3                | rs7538379   | 1   | 104067356 | T             | C            | 0.040 | -1.040 | 0.062 | 4.9E-63   | Sun    |
| Plasma | ANG      | P03950;W0UV<br>28                | rs17114671  | 14  | 21155270  | C             | T            | 0.119 | 0.806  | 0.060 | 1.918E-38 | Suhre  |
| Plasma | ANGPTL1  | A0A024R908;<br>O95841            | rs16853043  | 1   | 178545926 | G             | A            | 0.352 | 0.431  | 0.025 | 5.4E-68   | Sun    |

|        |                  |                                         |             |    |           |   |   |       |        |       |           |       |
|--------|------------------|-----------------------------------------|-------------|----|-----------|---|---|-------|--------|-------|-----------|-------|
| Plasma | APCS             | P02743;V9HW<br>P0                       | rs71632673  | 1  | 159536213 | A | C | 0.023 | -0.837 | 0.082 | 1.9E-24   | Sun   |
| Plasma | APMAP            | Q9HDC9                                  | rs8125909   | 20 | 24975835  | C | A | 0.132 | 0.297  | 0.036 | 2.8E-16   | Sun   |
| Plasma | APOA5            | A0A0B4RUS7;<br>Q6Q788                   | rs964184    | 11 | 116648917 | C | G | 0.869 | 0.263  | 0.036 | 4.9E-13   | Sun   |
| Plasma | APOB             | P04114;Q59HB<br>3;Q7Z7Q0                | rs520354    | 2  | 21259612  | G | A | 0.473 | 0.303  | 0.042 | 6.929E-13 | Suhre |
| Plasma | APOL1            | O14791;Q2KH<br>Q6;B1AH95                | rs71314970  | 22 | 36638705  | T | C | 0.106 | -0.366 | 0.041 | 3.5E-19   | Sun   |
| Plasma | ARFIP1           | B4E273;P5336<br>7;Q8N8M9;B7<br>ZA10     | rs4619875   | 4  | 153701130 | T | C | 0.404 | 0.239  | 0.025 | 6.6E-22   | Sun   |
| Plasma | ARSB             | A0A024RAJ9;P<br>15848;A8K4A0            | rs13159135  | 5  | 78196689  | C | G | 0.434 | -0.214 | 0.025 | 5.9E-18   | Sun   |
| Plasma | ART3             | Q13508                                  | rs4859610   | 4  | 77000441  | G | A | 0.774 | -0.338 | 0.029 | 3E-32     | Sun   |
| Plasma | ART4             | Q93070                                  | rs1001096   | 12 | 14988455  | A | G | 0.397 | 0.740  | 0.022 | 1E-200    | Sun   |
| Plasma | ASAH2;AS<br>AH2B | Q9NR71;P0C7<br>U1                       | rs10740617  | 10 | 52027609  | C | A | 0.794 | 0.667  | 0.028 | 2E-124    | Sun   |
| Plasma | ASPH             | Q12797;B7ZM<br>96;A0A0A0MS<br>K8;B4DQ07 | rs112760834 | 8  | 62540134  | T | G | 0.033 | -0.578 | 0.069 | 4.1E-17   | Sun   |
| Plasma | ASPN             | Q9BXN1;Q6P5<br>28                       | rs2516568   | 9  | 95187380  | T | A | 0.323 | -0.472 | 0.025 | 2.3E-79   | Sun   |
| Plasma | ATP1B2           | P14415                                  | rs1642762   | 17 | 7554772   | T | C | 0.587 | -0.288 | 0.026 | 1.5E-29   | Sun   |
| Plasma | B3GAT3           | Q5U676;G3V1<br>50;O94766                | rs12794886  | 11 | 62383715  | C | G | 0.707 | 0.442  | 0.026 | 8.3E-63   | Sun   |
| Plasma | B4GALT1          | P15291;W6ME<br>N3                       | rs7019909   | 9  | 33113322  | T | C | 0.103 | 0.448  | 0.040 | 7.9E-29   | Sun   |
| Plasma | B4GALT2          | O60909                                  | rs2286241   | 1  | 44440769  | C | G | 0.056 | -0.673 | 0.052 | 3E-38     | Sun   |
| Plasma | BPI              | P17213                                  | rs1780617   | 20 | 36974157  | G | A | 0.122 | -0.644 | 0.037 | 1.1E-67   | Sun   |
| Plasma | BPIFB1           | Q8TDL5                                  | rs2424961   | 20 | 31694060  | T | C | 0.579 | -0.437 | 0.025 | 3.9E-71   | Sun   |
| Plasma | BST1             | Q10588                                  | rs73224660  | 4  | 15714762  | A | G | 0.159 | -1.397 | 0.024 | 1E-200    | Sun   |
| Plasma | C1QC             | A0A024RAA7;<br>P02747                   | rs78865058  | 1  | 22944209  | A | G | 0.042 | 1.075  | 0.060 | 4.3E-71   | Sun   |

|        |                  |                                                    |             |    |           |   |   |       |        |       |           |       |
|--------|------------------|----------------------------------------------------|-------------|----|-----------|---|---|-------|--------|-------|-----------|-------|
| Plasma | CIQTNF5          | A0A024R3F8;<br>Q9BXJ0                              | rs2248863   | 11 | 119207341 | A | G | 0.142 | 0.326  | 0.035 | 3.5E-21   | Sun   |
| Plasma | C7               | P10643;Q05CI3                                      | rs429017    | 5  | 41263091  | A | G | 0.253 | 0.433  | 0.050 | 9.039E-18 | Suhre |
| Plasma | CA10             | Q9NS85                                             | rs117399000 | 17 | 50213731  | A | G | 0.037 | -0.594 | 0.066 | 3E-19     | Sun   |
| Plasma | CA13             | Q8N1Q1                                             | rs17741049  | 8  | 86198253  | T | C | 0.068 | -0.744 | 0.080 | 7.915E-20 | Suhre |
| Plasma | CA3              | P07451;V9HW<br>A3                                  | rs2072696   | 8  | 86351051  | C | G | 0.238 | -0.217 | 0.029 | 6.8E-14   | Sun   |
| Plasma | CA6              | B4DUH8;P232<br>80                                  | rs3765963   | 1  | 9034598   | G | A | 0.402 | 0.677  | 0.023 | 4.1E-185  | Sun   |
| Plasma | CACNA2D3         | Q8IZS8                                             | rs34084772  | 3  | 54153517  | A | G | 0.184 | -0.233 | 0.032 | 5.1E-13   | Sun   |
| Plasma | CAPN1;CAP<br>NS1 | B2RDI5;P0738<br>4;B4DWH5;P0<br>4632;A0A0C4<br>DGQ5 | rs10895987  | 11 | 64904908  | T | C | 0.226 | -0.459 | 0.051 | 1.007E-18 | Suhre |
| Plasma | CASP3            | P42574                                             | rs870825    | 4  | 185588045 | G | A | 0.157 | -0.396 | 0.058 | 1.8E-11   | Suhre |
| Plasma | CBLN1            | P23435                                             | rs10852587  | 16 | 49006458  | A | T | 0.144 | -1.081 | 0.033 | 1E-200    | Sun   |
| Plasma | CBLN4            | Q9NTU7                                             | rs74447607  | 20 | 54447947  | T | C | 0.192 | -0.218 | 0.031 | 3E-12     | Sun   |
| Plasma | CBR1             | P16152                                             | rs16993864  | 21 | 37446599  | A | C | 0.022 | -1.215 | 0.083 | 6.6E-49   | Sun   |
| Plasma | CBR3             | O75828;V9HW<br>40                                  | rs1028997   | 21 | 37532222  | A | G | 0.376 | -0.764 | 0.022 | 1E-200    | Sun   |
| Plasma | CCDC126          | A0A024RA08;<br>Q96EE4                              | rs227934    | 7  | 23627287  | T | C | 0.479 | -0.275 | 0.025 | 6.9E-29   | Sun   |
| Plasma | CCL14            | Q16627                                             | rs9903158   | 17 | 34312337  | C | T | 0.056 | -1.081 | 0.050 | 3.5E-104  | Sun   |
| Plasma | CCL15            | A0A0B4J2E2;<br>Q16663                              | rs854624    | 17 | 34327923  | T | G | 0.931 | -1.691 | 0.039 | 1E-200    | Sun   |
| Plasma | CCL16            | O15467                                             | rs112689088 | 17 | 34307457  | C | T | 0.098 | -1.525 | 0.034 | 1E-200    | Sun   |
| Plasma | CCL18            | P55774                                             | rs9904601   | 17 | 34372006  | A | G | 0.117 | 0.863  | 0.060 | 2.482E-43 | Suhre |
| Plasma | CCL23            | P55773                                             | rs712048    | 17 | 34326215  | C | A | 0.874 | 0.729  | 0.035 | 1.6E-94   | Sun   |
| Plasma | CCL25            | O15444                                             | rs74959615  | 19 | 8121096   | A | G | 0.078 | -0.972 | 0.043 | 5.2E-114  | Sun   |
| Plasma | CCL3L1           | P16619                                             | rs2015086   | 17 | 34391617  | G | A | 0.131 | 0.496  | 0.036 | 3.1E-42   | Sun   |

|        |         |                                                |            |    |           |   |   |       |        |       |           |           |
|--------|---------|------------------------------------------------|------------|----|-----------|---|---|-------|--------|-------|-----------|-----------|
| Plasma | CCL4    | P13236                                         | rs6607368  | 17 | 34819136  | A | C | 0.800 | 0.510  | 0.044 | 6.3E-31   | Folkersen |
| Plasma | CCL5    | D0EI67;P13501                                  | rs4239252  | 17 | 34163565  | A | G | 0.211 | -0.346 | 0.053 | 7.825E-11 | Suhre     |
| Plasma | CCL8    | P80075                                         | rs3138036  | 17 | 32647544  | G | A | 0.145 | -0.470 | 0.060 | 1.326E-14 | Suhre     |
| Plasma | CCNH    | P51946                                         | rs2230641  | 5  | 86695274  | G | A | 0.205 | -0.239 | 0.031 | 1.2E-14   | Sun       |
| Plasma | CD14    | P08571                                         | rs3138074  | 5  | 140015932 | A | T | 0.777 | 0.332  | 0.022 | 9.22E-53  | Yao       |
| Plasma | CD177   | A0A087WVM2<br>;Q8N6Q3                          | rs73554000 | 19 | 43825494  | C | G | 0.024 | 1.803  | 0.079 | 4.4E-116  | Sun       |
| Plasma | CD200R1 | Q8TD46                                         | rs6791672  | 3  | 112591392 | A | G | 0.591 | -0.176 | 0.025 | 2.8E-12   | Sun       |
| Plasma | CD300C  | Q08708                                         | rs62087214 | 17 | 72467626  | G | A | 0.039 | -0.679 | 0.064 | 1.7E-26   | Sun       |
| Plasma | CD33    | P20138;Q546G<br>0                              | rs12459419 | 19 | 51728477  | T | C | 0.329 | -0.944 | 0.021 | 1E-200    | Sun       |
| Plasma | CD48    | A0A087X1S7;P<br>09326                          | rs12124234 | 1  | 160675269 | C | G | 0.405 | 0.264  | 0.025 | 1.1E-25   | Sun       |
| Plasma | CD55    | P08174;B1AP1<br>3                              | rs11580387 | 1  | 207418408 | G | A | 0.234 | -0.521 | 0.028 | 4.7E-78   | Sun       |
| Plasma | CD59    | P13987;Q6FH<br>M9                              | rs2273121  | 11 | 33757770  | A | G | 0.252 | -0.362 | 0.027 | 4.7E-41   | Sun       |
| Plasma | CD5L    | O43866                                         | rs2765501  | 1  | 157804648 | G | A | 0.608 | -0.285 | 0.018 | 4.76E-54  | Yao       |
| Plasma | CDNF    | Q49AH0                                         | rs61738953 | 10 | 14862082  | G | C | 0.042 | -0.629 | 0.068 | 2.5E-20   | Sun       |
| Plasma | CDON    | Q4KMG0                                         | rs3740909  | 11 | 125889526 | T | C | 0.073 | -0.829 | 0.078 | 4.415E-25 | Suhre     |
| Plasma | CEL     | B4DSX9;O756<br>12;Q86SR3;X6<br>R868            | rs8193016  | 9  | 135917744 | T | C | 0.035 | 0.685  | 0.068 | 8.3E-24   | Sun       |
| Plasma | CFH     | A0A024R962;P<br>08603;A0A0D9<br>SG88           | rs2274700  | 1  | 196682947 | A | G | 0.399 | 0.367  | 0.024 | 1.6E-51   | Sun       |
| Plasma | CFHR5   | Q9BXR6                                         | rs35662416 | 1  | 196967354 | A | G | 0.030 | -1.200 | 0.068 | 3E-69     | Sun       |
| Plasma | CFI     | A8K3L0;P0515<br>6;B4DRF2;Q8<br>WW88;G3XA<br>M2 | rs7439493  | 4  | 110656730 | A | G | 0.416 | 0.312  | 0.025 | 8.9E-37   | Sun       |

|        |         |                              |            |    |           |   |   |       |        |       |           |       |
|--------|---------|------------------------------|------------|----|-----------|---|---|-------|--------|-------|-----------|-------|
| Plasma | CHIT1   | Q13231                       | rs872583   | 1  | 203184766 | C | T | 0.202 | -1.098 | 0.025 | 1E-200    | Sun   |
| Plasma | CHL1    | O00533;A0A087X0M8            | rs1015456  | 3  | 107776    | C | T | 0.392 | -0.208 | 0.026 | 3.2E-16   | Sun   |
| Plasma | CHRD12  | Q6WN34                       | rs11607100 | 11 | 74414919  | T | C | 0.042 | -0.642 | 0.061 | 5.8E-26   | Sun   |
| Plasma | CHST9   | Q7L1S5;A0A024RC28            | rs9952639  | 18 | 24709604  | C | G | 0.318 | 0.333  | 0.026 | 7.2E-37   | Sun   |
| Plasma | CKM     | B2R892;P06732                | rs11559024 | 19 | 45821183  | C | T | 0.022 | -0.679 | 0.084 | 9.1E-16   | Sun   |
| Plasma | CLEC12A | Q5QGZ9                       | rs2961544  | 12 | 10136672  | A | G | 0.639 | -1.254 | 0.013 | 1E-200    | Sun   |
| Plasma | CLEC3B  | E9PHK0;A0A024R2Q7;P05452     | rs2056320  | 3  | 45092415  | G | A | 0.763 | 0.213  | 0.209 | 1.38E-23  | Yao   |
| Plasma | CLIC5   | Q53G01;Q9NZ A1;Q49AE1        | rs35822882 | 6  | 45916999  | T | G | 0.034 | -0.734 | 0.068 | 7.4E-27   | Sun   |
| Plasma | CLMP    | B4E3S3;Q9H6 B4               | rs35483681 | 11 | 123045730 | T | C | 0.554 | 0.249  | 0.025 | 4.5E-24   | Sun   |
| Plasma | CLPS    | A0A087WZW1;A0A087X0Q7;P04118 | rs9380534  | 6  | 35751572  | A | G | 0.602 | 0.448  | 0.025 | 3.5E-71   | Sun   |
| Plasma | CNDP1   | Q96KN2                       | rs17817077 | 18 | 72209543  | A | G | 0.406 | 0.350  | 0.044 | 4.72E-15  | Suhre |
| Plasma | CNTFR   | P26992                       | rs10972159 | 9  | 34593086  | A | G | 0.018 | -0.700 | 0.094 | 1E-13     | Sun   |
| Plasma | CNTN1   | Q12860;A0A024R104            | rs1838343  | 12 | 41196230  | C | T | 0.580 | 0.207  | 0.021 | 6.45E-24  | Yao   |
| Plasma | CNTN2   | A0A024R9B4;Q02246;A1L3A3     | rs2071533  | 1  | 205012198 | G | T | 0.865 | -0.771 | 0.035 | 6.9E-108  | Sun   |
| Plasma | CNTN4   | A0A024R2E5;Q8I WV2           | rs163352   | 3  | 3098041   | C | G | 0.813 | -0.325 | 0.032 | 2.7E-24   | Sun   |
| Plasma | CNTN5   | O94779                       | rs1461672  | 11 | 99175378  | T | C | 0.061 | 0.734  | 0.082 | 2.241E-18 | Suhre |
| Plasma | CNTNAP2 | A0A090N7T7;B2RCH4;Q9U HC6    | rs10274393 | 7  | 145378588 | C | G | 0.711 | -0.433 | 0.026 | 1.1E-60   | Sun   |
| Plasma | COCH    | O43405                       | rs34907608 | 14 | 31330413  | A | G | 0.119 | 0.476  | 0.037 | 1E-38     | Sun   |
| Plasma | COL15A1 | B3KTP7;P39059                | rs41305481 | 9  | 101767385 | G | A | 0.302 | 0.244  | 0.027 | 1.9E-19   | Sun   |



|        |          |                      |            |    |           |   |                                                  |       |        |       |           |           |
|--------|----------|----------------------|------------|----|-----------|---|--------------------------------------------------|-------|--------|-------|-----------|-----------|
| Plasma | COL18A1  | D3DSM5;P39060;D3DSM4 | rs2274809  | 21 | 46906711  | G | A                                                | 0.645 | 0.166  | 0.022 | 1.97E-14  | Yao       |
| Plasma | COL6A1   | P12109               | rs434206   | 21 | 47366802  | T | G                                                | 0.594 | -0.212 | 0.025 | 5.2E-17   | Sun       |
| Plasma | COLEC12  | Q5KU26               | rs2846667  | 18 | 466810    | G | T                                                | 0.745 | 0.202  | 0.030 | 9.3E-12   | Sun       |
| Plasma | CP       | A5PL27;P00450        | rs34004251 | 3  | 148929951 | T | A                                                | 0.812 | -0.263 | 0.025 | 4.91E-25  | Yao       |
| Plasma | CPA4     | Q9UI42;A4D1M3        | rs34587586 | 7  | 129938598 | T | G                                                | 0.393 | -1.166 | 0.015 | 1E-200    | Sun       |
| Plasma | CPB1     | P15086               | rs13318853 | 3  | 148562399 | A | G                                                | 0.232 | 0.256  | 0.029 | 2E-18     | Sun       |
| Plasma | CPB2     | A0A087WSY5;Q96IY4    | rs3742264  | 13 | 46648094  | T | C                                                | 0.321 | 0.849  | 0.040 | 2.806E-83 | Suhre     |
| Plasma | CPM      | P14384               | rs1908671  | 12 | 69433404  | C | G                                                | 0.292 | -0.186 | 0.027 | 8.1E-12   | Sun       |
| Plasma | CPNE1    | B0QZ18;Q99829        | rs12481228 | 20 | 34218673  | C | G                                                | 0.098 | -0.977 | 0.038 | 1.8E-146  | Sun       |
| Plasma | CPXM1    | Q96SM3               | rs67159741 | 20 | 2780762   | G | GCGCG<br>CGCGT<br>GCACT<br>GTGTG<br>TGCGC<br>GCA | 0.100 | -0.643 | 0.040 | 1E-57     | Sun       |
| Plasma | CPZ      | Q66K79               | rs2631738  | 4  | 8479754   | G | A                                                | 0.519 | 0.195  | 0.024 | 1E-15     | Sun       |
| Plasma | CREB3L4  | Q8TEY5               | rs4845586  | 1  | 153942597 | G | T                                                | 0.470 | 0.256  | 0.025 | 7.1E-25   | Sun       |
| Plasma | CREG1    | O75629               | rs7513428  | 1  | 167515272 | C | T                                                | 0.836 | -0.311 | 0.033 | 1.4E-20   | Sun       |
| Plasma | CRELD1   | Q96HD1;A0A024R2G1    | rs7627326  | 3  | 9981734   | T | G                                                | 0.240 | -1.094 | 0.022 | 1E-200    | Sun       |
| Plasma | CRISP2   | A0A024RD74;P16562    | rs478328   | 6  | 49720877  | G | A                                                | 0.454 | 0.570  | 0.023 | 4.2E-139  | Sun       |
| Plasma | CRISPLD2 | A0A140VK80;Q9H0B8    | rs12921670 | 16 | 84838761  | A | G                                                | 0.257 | 0.262  | 0.029 | 5.4E-19   | Sun       |
| Plasma | CRP      | P02741               | rs2211320  | 1  | 159693605 | G | A                                                | 0.677 | 0.149  | 0.020 | 4.77E-14  | Yao       |
| Plasma | CSF1     | A0A024R0A1;P09603    | rs17610659 | 1  | 110503296 | T | C                                                | 0.480 | 0.150  | 0.024 | 6.5E-10   | Folkersen |
| Plasma | CSF2RB   | P32927;Q6NSJ8        | rs1534881  | 22 | 37329448  | A | G                                                | 0.446 | -0.316 | 0.024 | 2.6E-38   | Sun       |

|        |             |                                          |             |    |           |   |   |       |        |       |           |           |
|--------|-------------|------------------------------------------|-------------|----|-----------|---|---|-------|--------|-------|-----------|-----------|
| Plasma | CSGALNAC T2 | A0A0S2Z5K4; Q8N6G5;A0A0S2Z5F9;A0A0S2Z5F5 | rs2435349   | 10 | 43643466  | G | A | 0.273 | -0.196 | 0.028 | 1.6E-12   | Sun       |
| Plasma | CST1        | P01037                                   | rs6114248   | 20 | 23711882  | A | G | 0.315 | 0.564  | 0.043 | 5.048E-37 | Suhre     |
| Plasma | CST2        | P09228                                   | rs6114248   | 20 | 23711882  | A | G | 0.315 | 0.515  | 0.043 | 4.39E-31  | Suhre     |
| Plasma | CST3        | A0A0K0K1J1; P01034                       | rs9111119   | 20 | 23612737  | T | C | 0.779 | 0.393  | 0.022 | 6.66E-73  | Yao       |
| Plasma | CST5        | P28325                                   | rs6138152   | 20 | 23850130  | G | A | 0.196 | 0.718  | 0.050 | 1.76E-42  | Suhre     |
| Plasma | CST6        | Q15828                                   | rs3825068   | 11 | 65768093  | G | A | 0.028 | 0.597  | 0.076 | 3.2E-15   | Sun       |
| Plasma | CST7        | O76096                                   | rs6138458   | 20 | 24973769  | A | G | 0.227 | -0.763 | 0.047 | 7.603E-53 | Suhre     |
| Plasma | CTRB1       | P17538                                   | rs8051363   | 16 | 75255217  | G | A | 0.704 | 0.647  | 0.024 | 1.6E-157  | Sun       |
| Plasma | CTSB        | Q5HYG5;A0A024R374;P07858;B4DMY4          | rs1692819   | 8  | 11705448  | A | G | 0.292 | 0.425  | 0.027 | 5.2E-54   | Sun       |
| Plasma | CTSD        | P07339;V9HWI3                            | rs111693235 | 11 | 1770224   | C | G | 0.710 | 0.350  | 0.033 | 2E-26     | Folkersen |
| Plasma | CTSF        | Q9UBX1                                   | rs1791679   | 11 | 66337874  | A | C | 0.289 | 0.235  | 0.027 | 2.5E-18   | Sun       |
| Plasma | CTSH        | P09668                                   | rs34593439  | 15 | 79234957  | A | G | 0.111 | -1.147 | 0.035 | 1E-200    | Sun       |
| Plasma | CTSS        | P25774                                   | rs41271951  | 1  | 150737220 | G | A | 0.083 | -0.861 | 0.042 | 7.1E-94   | Sun       |
| Plasma | CXCL11      | O14625                                   | rs10031452  | 4  | 76924933  | C | T | 0.529 | -0.233 | 0.025 | 2.4E-21   | Sun       |
| Plasma | CXCL16      | Q9H2A7                                   | rs144830084 | 17 | 4618101   | T | A | 0.256 | -0.225 | 0.028 | 1.4E-15   | Sun       |
| Plasma | CXCL6       | P80162                                   | rs16850073  | 4  | 74703999  | T | C | 0.377 | 0.888  | 0.038 | 9.66E-98  | Suhre     |
| Plasma | DCBLD2      | Q96PD2                                   | rs9864010   | 3  | 98678173  | A | G | 0.055 | -0.620 | 0.054 | 6.6E-31   | Sun       |
| Plasma | DEFB1       | P60022                                   | rs2738176   | 8  | 6738228   | A | T | 0.365 | -0.389 | 0.025 | 5.6E-55   | Sun       |
| Plasma | DEFB104A    | Q8WTQ1                                   | rs183772362 | 8  | 7243016   | T | C | 0.033 | 0.504  | 0.072 | 2.1E-12   | Sun       |
| Plasma | DKK 1       | I1W660;O94907                            | rs1194673   | 10 | 54141652  | A | G | 0.632 | 0.182  | 0.026 | 2.8E-12   | Sun       |

|        |         |                                        |            |    |           |   |   |       |        |       |            |       |
|--------|---------|----------------------------------------|------------|----|-----------|---|---|-------|--------|-------|------------|-------|
| Plasma | DKK 3   | Q9UBP4;F6SY F8                         | rs11022114 | 11 | 12038874  | A | G | 0.328 | 0.336  | 0.027 | 6.5E-36    | Sun   |
| Plasma | DLK1    | A8K019;P8037 0;A0A024R6L1              | rs12881760 | 14 | 101176335 | C | G | 0.676 | 0.536  | 0.025 | 3.5E-101   | Sun   |
| Plasma | DLL1    | O00548                                 | rs959025   | 6  | 170588654 | T | C | 0.416 | 0.191  | 0.025 | 1.3E-14    | Sun   |
| Plasma | DNAJC30 | B3KSU4;Q96L L9                         | rs73702564 | 7  | 73084816  | T | C | 0.039 | 0.718  | 0.062 | 6.9E-31    | Sun   |
| Plasma | DPP7    | Q9UHL4                                 | rs10747049 | 9  | 140008750 | C | G | 0.750 | 0.364  | 0.028 | 2.3E-39    | Sun   |
| Plasma | DPT     | Q07507                                 | rs1018454  | 1  | 168697761 | C | A | 0.586 | 0.416  | 0.024 | 7.8E-67    | Sun   |
| Plasma | DSC2    | Q02487                                 | rs1789063  | 18 | 28673913  | A | T | 0.769 | -0.216 | 0.029 | 1.8E-13    | Sun   |
| Plasma | DSG2    | Q14126                                 | rs2704050  | 18 | 29095888  | G | A | 0.493 | -0.169 | 0.025 | 9.3E-12    | Sun   |
| Plasma | DUSP13  | Q6B8I1;A0A02 4QZR6;Q9UII6 ;U3KQ82      | rs6480771  | 10 | 76861680  | C | T | 0.415 | -0.299 | 0.025 | 8.3E-34    | Sun   |
| Plasma | ECM1    | Q16610;A0A14 0VJI7                     | rs13294    | 1  | 150484987 | A | G | 0.398 | -0.849 | 0.035 | 7.727E-102 | Suhre |
| Plasma | EDAR    | Q9UNE0                                 | rs6750059  | 2  | 109611097 | C | T | 0.249 | -0.440 | 0.049 | 1.343E-18  | Suhre |
| Plasma | EFEMP1  | A0A0S2Z4F1; B2R6M6;Q128 05;A0A0S2Z3 V1 | rs3791679  | 2  | 56096892  | A | G | 0.761 | -0.226 | 0.021 | 2.49E-26   | Yao   |
| Plasma | EGF     | P01133                                 | rs11568972 | 4  | 110889007 | C | A | 0.337 | 0.265  | 0.026 | 3.1E-25    | Sun   |
| Plasma | EMILIN3 | Q9NT22                                 | rs61739314 | 20 | 39990377  | C | G | 0.033 | -0.686 | 0.069 | 3.6E-23    | Sun   |
| Plasma | ENPP5   | Q9UJA9;B4DH N2                         | rs1047153  | 6  | 46128745  | T | C | 0.646 | -0.789 | 0.021 | 1E-200     | Sun   |
| Plasma | ENPP7   | Q6UWV6                                 | rs11871061 | 17 | 77706544  | C | T | 0.359 | 0.987  | 0.020 | 1E-200     | Sun   |
| Plasma | ENTPD1  | P49961                                 | rs11188501 | 10 | 97600919  | A | G | 0.340 | 0.215  | 0.026 | 2.2E-16    | Sun   |
| Plasma | ENTPD5  | A0A024R6D3; O75356;A0A02 4R6B4;G3V4I0  | rs57731447 | 14 | 74487521  | A | G | 0.059 | -0.967 | 0.049 | 7.8E-87    | Sun   |

|        |         |                             |            |    |           |   |   |       |        |       |           |       |
|--------|---------|-----------------------------|------------|----|-----------|---|---|-------|--------|-------|-----------|-------|
| Plasma | EPHB2   | B4DSE0;Q4LE53;Q6NVW1;P29323 | rs6687487  | 1  | 23061551  | A | G | 0.080 | -0.612 | 0.045 | 1.3E-42   | Sun   |
| Plasma | ERAP1   | Q9NZ08                      | rs17482078 | 5  | 96118866  | T | C | 0.216 | -0.962 | 0.025 | 1E-200    | Sun   |
| Plasma | ERAP2   | B2R769;Q6P179               | rs2927608  | 5  | 96252432  | A | G | 0.437 | 1.052  | 0.017 | 1E-200    | Sun   |
| Plasma | ERLEC1  | Q96DZ1;V9HWD3               | rs58359565 | 2  | 53958919  | A | C | 0.219 | -0.208 | 0.030 | 2.1E-12   | Sun   |
| Plasma | ERO1B   | Q86YB8                      | rs1254194  | 1  | 236399442 | T | G | 0.596 | -0.382 | 0.024 | 1.9E-56   | Sun   |
| Plasma | ESAM    | Q96AP7                      | rs11219769 | 11 | 124620147 | T | G | 0.264 | -0.235 | 0.028 | 3.6E-17   | Sun   |
| Plasma | ESD     | A0A140VJJ2;P10768           | rs8192888  | 13 | 47362384  | C | G | 0.094 | -0.806 | 0.040 | 9.8E-89   | Sun   |
| Plasma | EVA1C   | P58658;B3KWG0               | rs6517101  | 21 | 33868483  | G | T | 0.331 | 0.179  | 0.026 | 5.9E-12   | Sun   |
| Plasma | F10     | P00742;Q5JVE7;Q5JVE8        | rs547138   | 13 | 113792170 | A | T | 0.615 | 0.258  | 0.027 | 5.8E-22   | Sun   |
| Plasma | F11     | P03951                      | rs2289252  | 4  | 187207381 | T | C | 0.413 | 0.442  | 0.042 | 4.6E-25   | Suhre |
| Plasma | F7      | P08709;B4DPM2;F5H8B0        | rs776905   | 13 | 113781942 | C | A | 0.113 | -1.104 | 0.060 | 9.164E-65 | Suhre |
| Plasma | FABP1   | P07148;Q05CP7;Q6FGL7        | rs2241883  | 2  | 88424066  | C | T | 0.303 | -0.191 | 0.027 | 2.4E-12   | Sun   |
| Plasma | FAH     | P16930                      | rs11555096 | 15 | 80472526  | T | C | 0.021 | -1.882 | 0.080 | 1.9E-121  | Sun   |
| Plasma | FAM151A | Q8WW52                      | rs11206397 | 1  | 55097068  | T | A | 0.327 | 0.265  | 0.026 | 2.6E-24   | Sun   |
| Plasma | FAM171B | Q6P995                      | rs10931256 | 2  | 187685195 | C | T | 0.216 | -0.334 | 0.030 | 1.1E-29   | Sun   |
| Plasma | FAM20A  | B7Z4Y3;Q8IYA5;Q96MK3;L8B8N7 | rs929477   | 17 | 66655816  | A | G | 0.094 | -0.372 | 0.042 | 5.1E-19   | Sun   |
| Plasma | FAM213A | Q9BRX8                      | rs10887868 | 10 | 82194264  | A | G | 0.412 | -0.188 | 0.025 | 5.5E-14   | Sun   |
| Plasma | FAM3B   | P58499                      | rs73226194 | 21 | 42721869  | T | C | 0.040 | -1.150 | 0.061 | 3.9E-78   | Sun   |
| Plasma | FAM3D   | A0A0A8K9B4;Q96BQ1           | rs3749290  | 3  | 58652292  | T | G | 0.096 | -0.481 | 0.041 | 2E-31     | Sun   |
| Plasma | FCER2   | K3W4U1;P06734               | rs12973524 | 19 | 7758263   | A | G | 0.484 | -0.306 | 0.025 | 5.8E-36   | Sun   |

|        |        |                                                       |            |    |           |   |   |       |        |       |           |       |
|--------|--------|-------------------------------------------------------|------------|----|-----------|---|---|-------|--------|-------|-----------|-------|
| Plasma | FCGR2B | P31994;P31995                                         | rs6665610  | 1  | 161641384 | A | G | 0.205 | 1.331  | 0.022 | 1E-200    | Sun   |
| Plasma | FCGR3B | O75015;M9M<br>ML6;A0A087<br>WZR4;A0A087<br>WU90       | rs10919543 | 1  | 161508617 | G | A | 0.324 | 0.435  | 0.025 | 3.2E-67   | Sun   |
| Plasma | FCN1   | O00602                                                | rs11103602 | 9  | 137854872 | A | G | 0.258 | 0.583  | 0.027 | 1.5E-106  | Sun   |
| Plasma | FCN2   | Q15485                                                | rs57136797 | 9  | 137752540 | T | A | 0.164 | -0.635 | 0.035 | 3.7E-72   | Sun   |
| Plasma | FCRL1  | Q96LA6                                                | rs4971155  | 1  | 157779182 | A | T | 0.506 | -0.256 | 0.024 | 6.3E-26   | Sun   |
| Plasma | FCRL3  | Q96P31                                                | rs7528684  | 1  | 157670816 | G | A | 0.465 | 0.525  | 0.023 | 1.4E-112  | Sun   |
| Plasma | FCRL4  | Q96PJ5                                                | rs11582663 | 1  | 157559122 | T | C | 0.144 | -1.133 | 0.030 | 1E-200    | Sun   |
| Plasma | FCRL6  | Q6DN72                                                | rs58240276 | 1  | 159783559 | T | C | 0.190 | -0.609 | 0.030 | 3.1E-92   | Sun   |
| Plasma | FETUB  | Q9UGM5;E9P<br>G08;Q5J875;B7<br>Z8T3                   | rs3733159  | 3  | 186360409 | G | T | 0.312 | 0.266  | 0.044 | 1.433E-09 | Suhre |
| Plasma | FGF2   | P09038                                                | rs308403   | 4  | 123757748 | T | C | 0.319 | -0.590 | 0.043 | 5.796E-39 | Suhre |
| Plasma | FLRT2  | O43155                                                | rs17796777 | 14 | 85806774  | C | A | 0.286 | -0.235 | 0.028 | 1.5E-17   | Sun   |
| Plasma | FLRT3  | Q9NZU0                                                | rs11908097 | 20 | 14689146  | C | T | 0.251 | 0.444  | 0.028 | 2.5E-57   | Sun   |
| Plasma | FLT4   | P35916                                                | rs34221241 | 5  | 180057293 | C | T | 0.104 | -0.363 | 0.040 | 1.5E-19   | Sun   |
| Plasma | FN1    | B7ZLE5;P0275<br>1;Q6MZM7;Q9<br>UQS6;Q6MZF4<br>;Q6N084 | rs1250258  | 2  | 216300185 | C | T | 0.255 | -0.711 | 0.045 | 1.282E-49 | Suhre |
| Plasma | FRZB   | D9ZGF6;Q927<br>65                                     | rs288326   | 2  | 183703336 | A | G | 0.126 | 0.566  | 0.036 | 3.7E-55   | Sun   |
| Plasma | FSTL1  | Q12841                                                | rs1147707  | 3  | 120169248 | T | C | 0.389 | -0.211 | 0.026 | 1.1E-16   | Sun   |
| Plasma | FUT10  | Q6P4F1                                                | rs2732317  | 8  | 33330687  | C | A | 0.612 | -0.450 | 0.024 | 2.5E-77   | Sun   |
| Plasma | FUT3   | A8K737;P2121<br>7                                     | rs708686   | 19 | 5840619   | T | C | 0.274 | -0.853 | 0.024 | 1E-200    | Sun   |
| Plasma | FUT5   | K7ENC0;Q111<br>28                                     | rs778809   | 19 | 5830302   | A | G | 0.301 | -0.580 | 0.025 | 1.3E-118  | Sun   |

|        |         |                                      |             |    |           |   |   |       |        |       |           |       |
|--------|---------|--------------------------------------|-------------|----|-----------|---|---|-------|--------|-------|-----------|-------|
| Plasma | FUT8    | Q546E0;Q9BY<br>C5;A8K8P8             | rs2127870   | 14 | 65796846  | C | G | 0.785 | -1.049 | 0.025 | 1E-200    | Sun   |
| Plasma | GALP    | Q9UBC7                               | rs111265125 | 19 | 56688781  | C | G | 0.022 | 0.647  | 0.091 | 1E-12     | Sun   |
| Plasma | GFRA1   | P56159;B7Z85<br>6                    | rs10885877  | 10 | 117966090 | G | C | 0.295 | 0.265  | 0.027 | 2E-22     | Sun   |
| Plasma | GFRA2   | O00451                               | rs15881     | 8  | 21550768  | C | A | 0.456 | 0.295  | 0.025 | 4.1E-33   | Sun   |
| Plasma | GFRAL   | Q6UXV0                               | rs72975088  | 6  | 55535375  | T | A | 0.148 | 0.247  | 0.035 | 1.3E-12   | Sun   |
| Plasma | GGH     | Q92820                               | rs10957266  | 8  | 63923764  | C | T | 0.071 | 0.799  | 0.046 | 1.2E-68   | Sun   |
| Plasma | GHR     | P10912;A0A08<br>7X0H5;A0A08<br>7X162 | rs150036324 | 5  | 42738222  | C | A | 0.594 | 0.179  | 0.026 | 1E-11     | Sun   |
| Plasma | GLCE    | O94923                               | rs11854180  | 15 | 69559340  | T | G | 0.769 | 0.829  | 0.025 | 1E-200    | Sun   |
| Plasma | GLRX2   | Q9NS18                               | rs148212596 | 1  | 193074511 | G | A | 0.020 | 1.184  | 0.088 | 3.5E-41   | Sun   |
| Plasma | GLTPD2  | A6NH11                               | rs34460487  | 17 | 4685228   | A | G | 0.346 | 0.267  | 0.026 | 6.8E-25   | Sun   |
| Plasma | GPLY    | B4E3H9;P2274<br>9                    | rs12151621  | 2  | 85934499  | A | C | 0.227 | 0.774  | 0.026 | 7.4E-189  | Sun   |
| Plasma | GNRH2   | O43555                               | rs3787480   | 20 | 3016895   | A | G | 0.149 | -0.240 | 0.034 | 2.3E-12   | Sun   |
| Plasma | GP1BA   | L7UYB8;P0735<br>9                    | rs72835078  | 17 | 4826592   | T | G | 0.072 | 0.328  | 0.048 | 9.1E-12   | Sun   |
| Plasma | GP5     | P40197                               | rs1466733   | 3  | 194120998 | A | G | 0.737 | 0.171  | 0.021 | 8.6E-17   | Yao   |
| Plasma | GP6     | Q9HCN6                               | rs1654439   | 19 | 55553647  | T | G | 0.170 | -0.657 | 0.055 | 6.59E-31  | Suhre |
| Plasma | GPC1    | P35052;H7C41<br>0                    | rs4074478   | 2  | 241446340 | T | C | 0.106 | 0.424  | 0.041 | 4.3E-25   | Sun   |
| Plasma | GPC5    | P78333                               | rs2147190   | 13 | 92058888  | T | C | 0.336 | 0.334  | 0.045 | 2.267E-13 | Suhre |
| Plasma | GPC5    | P78333                               | rs342702    | 13 | 92422946  | T | G | 0.274 | -0.804 | 0.025 | 1E-200    | Sun   |
| Plasma | GPNMB   | Q14956;A0A02<br>4RA55;Q96F58         | rs2268748   | 7  | 23313171  | C | T | 0.041 | 0.687  | 0.062 | 1.2E-28   | Sun   |
| Plasma | GPX7    | Q96SL4                               | rs1097234   | 1  | 53063559  | A | C | 0.175 | 0.563  | 0.031 | 1.6E-73   | Sun   |
| Plasma | GRAMD1C | Q8IYS0;B3KU<br>R5                    | rs61077924  | 3  | 113625933 | G | C | 0.324 | 0.620  | 0.024 | 3.4E-148  | Sun   |

|        |         |                                  |            |    |           |   |   |       |        |       |           |           |
|--------|---------|----------------------------------|------------|----|-----------|---|---|-------|--------|-------|-----------|-----------|
| Plasma | GRN     | P28799                           | rs5848     | 17 | 42430244  | T | C | 0.287 | -0.276 | 0.028 | 8.1E-23   | Sun       |
| Plasma | GSTA1   | A0A140VJK4;<br>P08263;B7Z1F<br>9 | rs2290758  | 6  | 52662153  | A | G | 0.570 | 0.416  | 0.024 | 7.2E-69   | Sun       |
| Plasma | GSTO1   | P78417;V9HW<br>G9                | rs2282326  | 10 | 106020398 | C | A | 0.354 | -0.911 | 0.020 | 1E-200    | Sun       |
| Plasma | GSTP1   | P09211;V9HW<br>E9                | rs1695     | 11 | 67352689  | G | A | 0.345 | -0.178 | 0.025 | 2.3E-12   | Sun       |
| Plasma | GZMM    | P51124                           | rs16989724 | 19 | 531115    | T | C | 0.935 | 0.430  | 0.053 | 3.9E-16   | Sun       |
| Plasma | H6PD    | R4GMU1;O954<br>79                | rs34603401 | 1  | 9305445   | C | A | 0.150 | 0.759  | 0.032 | 1E-126    | Sun       |
| Plasma | HAVCR2  | Q8TDQ0                           | rs6874178  | 5  | 156530149 | T | A | 0.817 | -0.734 | 0.029 | 1E-145    | Sun       |
| Plasma | HBZ     | P02008                           | rs2461286  | 16 | 203254    | G | A | 0.647 | -0.885 | 0.021 | 1E-200    | Sun       |
| Plasma | HDHD2   | Q9H0R4;V9H<br>W73                | rs75228657 | 18 | 44741063  | G | A | 0.052 | 0.702  | 0.054 | 4.7E-38   | Sun       |
| Plasma | HGFAC   | D6RAR4;Q047<br>56                | rs1203119  | 4  | 3406952   | A | G | 0.082 | -0.985 | 0.076 | 1.095E-35 | Suhre     |
| Plasma | HP      | P00738;Q6PEJ<br>8;A0A0C4DGL<br>8 | rs217184   | 16 | 72105965  | C | T | 0.196 | 0.869  | 0.028 | 1E-200    | Sun       |
| Plasma | HPGDS   | O60760                           | rs1965049  | 4  | 95266204  | G | A | 0.621 | 0.440  | 0.025 | 1.3E-71   | Sun       |
| Plasma | HPX     | P02790;Q9BS1<br>9                | rs7935957  | 11 | 6450200   | A | T | 0.788 | -0.252 | 0.022 | 5.06E-30  | Yao       |
| Plasma | HS6ST1  | O60243                           | rs34827544 | 2  | 129084425 | T | C | 0.157 | -0.305 | 0.035 | 1.9E-18   | Sun       |
| Plasma | HSP90B1 | P14625;V9HW<br>P2                | rs1165693  | 12 | 104340204 | A | G | 0.321 | 1.097  | 0.018 | 1E-200    | Sun       |
| Plasma | HSPB1   | P04792;V9HW<br>43                | rs13236526 | 7  | 75913642  | A | G | 0.700 | 0.360  | 0.042 | 1.1E-17   | Folkersen |
| Plasma | ICAM1   | P05362                           | rs5498     | 19 | 10395683  | G | A | 0.431 | -1.199 | 0.014 | 1E-200    | Sun       |
| Plasma | ICAM5   | Q8N6I2;Q9UM<br>F0                | rs281439   | 19 | 10400110  | C | G | 0.780 | 0.892  | 0.026 | 1E-200    | Sun       |
| Plasma | ICOSLG  | O75144;B7Z1<br>W8;A0N0L8         | rs11558819 | 21 | 45656774  | T | C | 0.269 | -0.576 | 0.026 | 3.5E-108  | Sun       |
| Plasma | IDO1    | P14902                           | rs7010461  | 8  | 39781444  | T | C | 0.334 | 0.250  | 0.027 | 2.5E-20   | Sun       |

|        |         |                                         |             |    |           |   |   |       |        |       |           |           |
|--------|---------|-----------------------------------------|-------------|----|-----------|---|---|-------|--------|-------|-----------|-----------|
| Plasma | IDUA    | P35475                                  | rs3822020   | 4  | 985727    | G | A | 0.637 | 0.608  | 0.024 | 7.2E-148  | Sun       |
| Plasma | IFI16   | Q16666                                  | rs72709516  | 1  | 159004851 | T | C | 0.044 | 0.852  | 0.058 | 2.6E-49   | Sun       |
| Plasma | IFNAR1  | P17181                                  | rs2257167   | 21 | 34715699  | C | G | 0.134 | -0.290 | 0.036 | 1.4E-15   | Sun       |
| Plasma | IGF2R   | P11717                                  | rs629849    | 6  | 160494409 | G | A | 0.871 | 0.899  | 0.033 | 9.5E-163  | Sun       |
| Plasma | IGFBP7  | Q16270                                  | rs1718849   | 4  | 57942323  | C | T | 0.766 | -0.363 | 0.028 | 5.2E-38   | Sun       |
| Plasma | IGFLR1  | K7EL86;Q9H6<br>65                       | rs12459634  | 19 | 36230174  | C | T | 0.145 | -0.701 | 0.033 | 5.8E-100  | Sun       |
| Plasma | IGLL1   | P15814                                  | rs139571703 | 22 | 23915620  | T | C | 0.037 | -0.726 | 0.069 | 9.8E-26   | Sun       |
| Plasma | IL11RA  | Q14626;Q5VZ7<br>9                       | rs11575578  | 9  | 34656479  | A | G | 0.068 | 0.507  | 0.048 | 4.4E-26   | Sun       |
| Plasma | IL12B   | P29460                                  | rs4921484   | 5  | 158769753 | C | T | 0.678 | 0.312  | 0.026 | 7.2E-33   | Sun       |
| Plasma | IL12RB2 | B4DGA4;Q996<br>65;A0A0A0MT<br>N7;B7ZB60 | rs12566098  | 1  | 67889571  | G | C | 0.688 | 0.257  | 0.027 | 6E-22     | Sun       |
| Plasma | IL15RA  | Q13261;A0A0<br>A0MS77;G8CV<br>M3        | rs8177641   | 10 | 6016892   | G | A | 0.318 | 0.509  | 0.025 | 1.7E-91   | Sun       |
| Plasma | IL16    | Q14005;Q9UM<br>E6                       | rs4778639   | 15 | 81600451  | G | T | 0.091 | -0.681 | 0.042 | 4.5E-59   | Sun       |
| Plasma | IL17RA  | Q96F46                                  | rs3827278   | 22 | 17595915  | A | C | 0.232 | 0.975  | 0.043 | 1.969E-93 | Suhre     |
| Plasma | IL17RB  | Q9NRM6                                  | rs2232346   | 3  | 53892830  | C | T | 0.037 | 1.182  | 0.064 | 3.5E-77   | Sun       |
| Plasma | IL17RD  | Q8NFM7;B4D<br>XM5                       | rs6776722   | 3  | 57142659  | A | G | 0.695 | -0.462 | 0.025 | 3.4E-74   | Sun       |
| Plasma | IL18    | A0A024R3E0;<br>Q14116                   | rs75649625  | 11 | 112052194 | G | A | 0.760 | 0.290  | 0.030 | 1.4E-21   | Folkersen |
| Plasma | IL18R1  | Q13478;B7ZK<br>V7                       | rs1420106   | 2  | 103035044 | G | A | 0.776 | -0.909 | 0.026 | 1E-200    | Sun       |
| Plasma | IL18RAP | O95256                                  | rs6543140   | 2  | 103074274 | T | G | 0.301 | 0.485  | 0.046 | 1.013E-24 | Suhre     |
| Plasma | IL1R2   | P27930                                  | rs7561460   | 2  | 102617204 | C | T | 0.396 | -0.403 | 0.024 | 6.2E-62   | Sun       |
| Plasma | IL1RAP  | A8K6K4;Q9NP<br>H3                       | rs6444442   | 3  | 190346060 | G | A | 0.841 | -1.352 | 0.025 | 1E-200    | Sun       |
| Plasma | IL1RL2  | Q9HB29                                  | rs2228139   | 2  | 102781649 | G | C | 0.069 | -0.425 | 0.048 | 1.6E-18   | Sun       |



|        |          |                                        |            |    |           |   |   |       |        |       |           |       |
|--------|----------|----------------------------------------|------------|----|-----------|---|---|-------|--------|-------|-----------|-------|
| Plasma | IL1RN    | P18510;A0A024R528                      | rs6761276  | 2  | 113832312 | C | T | 0.578 | -0.191 | 0.025 | 1.5E-14   | Sun   |
| Plasma | IL23R    | Q5VWK5                                 | rs11581607 | 1  | 67707690  | A | G | 0.067 | -0.420 | 0.049 | 1.2E-17   | Sun   |
| Plasma | IL27RA   | Q6UWB1                                 | rs35026308 | 19 | 14153293  | C | T | 0.176 | -0.946 | 0.029 | 1E-200    | Sun   |
| Plasma | IL5RA    | A0A024R2C8;Q01344;Q8NHV7               | rs77400868 | 3  | 3150964   | G | A | 0.139 | 0.510  | 0.036 | 6.8E-45   | Sun   |
| Plasma | IL6ST    | A0A0A0N0L2;P40189;Q17RA0               | rs11574765 | 5  | 55278967  | G | A | 0.116 | 0.381  | 0.039 | 1E-22     | Sun   |
| Plasma | IL7R     | P16871                                 | rs11957503 | 5  | 35883176  | G | T | 0.437 | 0.425  | 0.044 | 1.922E-21 | Suhre |
| Plasma | ISG15    | P05161                                 | rs1891906  | 1  | 950243    | C | A | 0.386 | 0.259  | 0.025 | 1.4E-24   | Sun   |
| Plasma | ISLR2    | Q6UXK2                                 | rs2959011  | 15 | 74611781  | T | A | 0.342 | 0.198  | 0.026 | 3.2E-14   | Sun   |
| Plasma | ITIH5    | G5E9D8;Q86UX2;Q96JW9;C9J2H1;A0A096LP62 | rs7909223  | 10 | 7700709   | G | A | 0.748 | 0.322  | 0.029 | 2E-29     | Sun   |
| Plasma | KDELC2   | A0A024R3C4;Q7Z4H8                      | rs74911261 | 11 | 108357137 | A | G | 0.027 | -1.314 | 0.075 | 1.1E-69   | Sun   |
| Plasma | KDR      | A0A024RD88;P35968                      | rs34231037 | 4  | 55972946  | G | A | 0.034 | -1.153 | 0.065 | 1E-70     | Sun   |
| Plasma | KIAA1161 | Q6NSJ0                                 | rs10972076 | 9  | 34356359  | T | C | 0.625 | 0.308  | 0.025 | 2.2E-34   | Sun   |
| Plasma | KLK7     | P49862;B4DHX9;A0A024R4H6               | rs2739419  | 19 | 51484562  | G | A | 0.908 | 0.703  | 0.041 | 1.1E-66   | Sun   |
| Plasma | KLK8     | A0A0A0MQY9;O60259                      | rs74705037 | 19 | 51504808  | A | G | 0.045 | 0.929  | 0.058 | 6.3E-58   | Sun   |
| Plasma | KNG1     | P01042                                 | rs2304456  | 3  | 186445052 | G | T | 0.103 | -1.366 | 0.058 | 2.888E-97 | Suhre |
| Plasma | KYAT3    | B4DW13;Q6YP21                          | rs9787133  | 1  | 89382664  | G | C | 0.494 | -0.172 | 0.025 | 2.9E-12   | Sun   |
| Plasma | LAMC2    | Q13753                                 | rs2276543  | 1  | 183155305 | A | G | 0.279 | 0.616  | 0.025 | 4.4E-133  | Sun   |
| Plasma | LCT      | P09848                                 | rs4988235  | 2  | 136608646 | A | G | 0.711 | 0.776  | 0.024 | 1E-200    | Sun   |
| Plasma | LEPR     | P48357;Q4G138                          | rs3790438  | 1  | 66085525  | A | T | 0.175 | -1.375 | 0.022 | 1E-200    | Sun   |

|        |        |                                                       |            |    |           |   |   |       |        |       |           |           |
|--------|--------|-------------------------------------------------------|------------|----|-----------|---|---|-------|--------|-------|-----------|-----------|
| Plasma | LGALS2 | P05162                                                | rs5756729  | 22 | 37961353  | T | C | 0.593 | -0.275 | 0.026 | 2.2E-26   | Sun       |
| Plasma | LGALS3 | A0A024R693;P17931                                     | rs9323280  | 14 | 55801687  | A | C | 0.870 | 0.770  | 0.046 | 5.6E-62   | Folkersen |
| Plasma | LHB    | A0A0F7RQE6;P01229                                     | rs75287599 | 19 | 49517140  | T | C | 0.078 | -0.434 | 0.046 | 2.4E-21   | Sun       |
| Plasma | LILRA4 | P59901                                                | rs2241384  | 19 | 54849942  | A | G | 0.170 | -0.309 | 0.033 | 3.4E-21   | Sun       |
| Plasma | LILRA5 | A6NI73                                                | rs759819   | 19 | 54815577  | C | T | 0.330 | -0.543 | 0.024 | 2.5E-111  | Sun       |
| Plasma | LILRA6 | Q6PI73                                                | rs35361042 | 19 | 54748737  | G | C | 0.091 | 1.340  | 0.038 | 1E-200    | Sun       |
| Plasma | LILRB1 | A0A087WSV6;Q8NHL6;A0A087WSX8;D9IDM5;A8MVE2;A0A0B4J1W1 | rs2114511  | 19 | 55145093  | C | G | 0.051 | -1.806 | 0.046 | 1E-200    | Sun       |
| Plasma | LILRB2 | Q8N423                                                | rs386056   | 19 | 54782919  | T | C | 0.201 | -1.150 | 0.023 | 1E-200    | Sun       |
| Plasma | LILRB5 | O75023                                                | rs12975366 | 19 | 54759361  | C | T | 0.405 | -1.161 | 0.015 | 1E-200    | Sun       |
| Plasma | LIPN   | Q5VXI9                                                | rs10509554 | 10 | 90525792  | T | C | 0.307 | 1.017  | 0.021 | 1E-200    | Sun       |
| Plasma | LMAN2L | Q9H0V9;B4DI83;B4E308;B4DVH1                           | rs2271893  | 2  | 97405440  | A | G | 0.323 | 0.263  | 0.026 | 4.4E-24   | Sun       |
| Plasma | LMNB1  | B4DZT3;P20700                                         | rs36105360 | 5  | 126161690 | T | C | 0.025 | 0.804  | 0.079 | 2.2E-24   | Sun       |
| Plasma | LPA    | P08519                                                | rs55730499 | 6  | 161005610 | C | T | 0.939 | -1.255 | 0.046 | 3.77E-167 | Yao       |
| Plasma | LRIG3  | Q6UXM1;C9K080                                         | rs11172791 | 12 | 59272973  | C | T | 0.045 | -0.462 | 0.061 | 4.8E-14   | Sun       |
| Plasma | LRPAP1 | P30533                                                | rs78770234 | 4  | 3496683   | A | G | 0.033 | -0.682 | 0.069 | 3.6E-23   | Sun       |
| Plasma | LRRC15 | Q8TF66;B3KW14                                         | rs57514363 | 3  | 194087927 | G | T | 0.113 | 0.593  | 0.038 | 5.9E-54   | Sun       |
| Plasma | LRRN1  | Q6UXK5;A8K6Q2                                         | rs6801789  | 3  | 3807592   | C | T | 0.354 | 0.246  | 0.025 | 2.3E-22   | Sun       |
| Plasma | LY9    | A0A0C4DFU4;Q9HBG7;Q05CA2;Q0VAI0;Q5VYH9                | rs540254   | 1  | 160767737 | C | T | 0.353 | 0.417  | 0.045 | 7.783E-20 | Suhre     |

|        |          |                                                |            |    |           |   |   |       |        |       |           |           |
|--------|----------|------------------------------------------------|------------|----|-----------|---|---|-------|--------|-------|-----------|-----------|
| Plasma | MAN2B2   | B7Z754;E9PC<br>D7;Q9Y2E5                       | rs2301790  | 4  | 6600012   | G | A | 0.484 | 0.334  | 0.024 | 1E-44     | Sun       |
| Plasma | MANBA    | O00462                                         | rs227370   | 4  | 103612043 | C | T | 0.675 | -0.560 | 0.025 | 7.8E-113  | Sun       |
| Plasma | MANEA    | Q5SRI9                                         | rs80268500 | 6  | 96009498  | C | T | 0.082 | -1.681 | 0.035 | 1E-200    | Sun       |
| Plasma | MANSC1   | Q9H8J5                                         | rs2160588  | 12 | 12487447  | A | G | 0.120 | 0.502  | 0.037 | 8.7E-42   | Sun       |
| Plasma | MANSC4   | A6NHS7                                         | rs36138811 | 12 | 27927881  | C | T | 0.232 | 0.637  | 0.028 | 7.4E-117  | Sun       |
| Plasma | MAPK13   | A0A024RD04;<br>O15264                          | rs12210904 | 6  | 36098191  | A | C | 0.289 | 0.254  | 0.027 | 1.5E-21   | Sun       |
| Plasma | MAPKAPK2 | P49137                                         | rs6669284  | 1  | 206890435 | A | G | 0.349 | 0.326  | 0.044 | 3.902E-13 | Suhre     |
| Plasma | MATN4    | A2RRP8;B3KQ<br>B2;A5D8U1;O<br>95460;A6NNA<br>4 | rs11697677 | 20 | 43925554  | G | A | 0.254 | -0.230 | 0.028 | 2.5E-16   | Sun       |
| Plasma | MBL2     | P11226                                         | rs7899547  | 10 | 54536839  | G | T | 0.653 | 0.948  | 0.020 | 1E-200    | Sun       |
| Plasma | MCAM     | A0A024R3I5;P<br>43121                          | rs11217234 | 11 | 119177938 | A | G | 0.718 | -0.144 | 0.026 | 4.32E-08  | Yao       |
| Plasma | MFAP2    | P55001;A0A02<br>4RA94                          | rs4920605  | 1  | 17315425  | A | G | 0.554 | 0.207  | 0.024 | 1.3E-17   | Sun       |
| Plasma | MFGE8    | Q08431;X6R3<br>G6;B4E396;F5<br>GZN3;B3KTQ2     | rs1961839  | 15 | 89467454  | A | G | 0.397 | -0.225 | 0.025 | 3.4E-19   | Sun       |
| Plasma | MGAT2    | Q10469                                         | rs28396798 | 14 | 50075319  | T | C | 0.547 | 0.195  | 0.024 | 1.3E-15   | Sun       |
| Plasma | MGAT4B   | Q9UQ53                                         | rs73351608 | 5  | 179232064 | T | A | 0.022 | -0.959 | 0.085 | 2.2E-29   | Sun       |
| Plasma | MGP      | A0A024RAX0;<br>P08493                          | rs7135211  | 12 | 15052758  | G | A | 0.622 | 0.265  | 0.019 | 3.62E-44  | Yao       |
| Plasma | MIA      | A0A024R0P1;<br>Q16674                          | rs2604877  | 19 | 41275048  | C | T | 0.068 | 1.442  | 0.042 | 1E-200    | Sun       |
| Plasma | MMP1     | B4DN15;P0395<br>6;Q53G95                       | rs471994   | 11 | 102697731 | G | A | 0.650 | 0.320  | 0.026 | 2.3E-35   | Folkersen |
| Plasma | MMP10    | P09238                                         | rs17860955 | 11 | 102649482 | C | T | 0.022 | -0.869 | 0.087 | 1.4E-23   | Sun       |
| Plasma | MMP12    | P39900                                         | rs28381684 | 11 | 102737192 | T | A | 0.125 | -0.779 | 0.035 | 5.1E-111  | Sun       |
| Plasma | MMP7     | P09237                                         | rs11568819 | 11 | 102401633 | A | G | 0.067 | 0.668  | 0.088 | 5.837E-14 | Suhre     |

|        |        |                                            |             |    |           |   |   |       |        |       |          |     |
|--------|--------|--------------------------------------------|-------------|----|-----------|---|---|-------|--------|-------|----------|-----|
| Plasma | MMP8   | B4E0I2;P22894                              | rs35231465  | 11 | 102584135 | A | G | 0.023 | -0.583 | 0.061 | 2.26E-21 | Yao |
| Plasma | MMP9   | P14780                                     | rs2250889   | 20 | 44642406  | C | G | 0.953 | -0.622 | 0.059 | 2.1E-26  | Sun |
| Plasma | MPO    | P05164                                     | rs34097845  | 17 | 56358429  | T | C | 0.067 | -0.574 | 0.050 | 8.5E-31  | Sun |
| Plasma | MRC2   | Q9UBG0                                     | rs146385050 | 17 | 60637258  | A | C | 0.195 | -0.219 | 0.032 | 1.3E-11  | Sun |
| Plasma | MSMB   | P08118                                     | rs10993994  | 10 | 51549496  | C | T | 0.596 | 0.982  | 0.019 | 1E-200   | Sun |
| Plasma | MTHFS  | P49914                                     | rs7173566   | 15 | 80211691  | C | T | 0.343 | -0.213 | 0.026 | 6E-16    | Sun |
| Plasma | MTRF1L | Q9UGC7;B4D<br>MX1                          | rs503366    | 6  | 153333550 | C | T | 0.497 | 0.165  | 0.024 | 1.1E-11  | Sun |
| Plasma | MXRA7  | P84157;Q6ZR6<br>4                          | rs9900613   | 17 | 74674857  | T | C | 0.431 | -0.229 | 0.025 | 1.9E-20  | Sun |
| Plasma | NAAA   | Q02083                                     | rs9996608   | 4  | 76848231  | T | C | 0.300 | -0.549 | 0.026 | 3.9E-101 | Sun |
| Plasma | NAGK   | C9JEV6;Q9UJ7<br>0                          | rs7606102   | 2  | 71276399  | G | A | 0.170 | -0.432 | 0.033 | 6E-39    | Sun |
| Plasma | NAGPA  | Q9UK23                                     | rs12599777  | 16 | 5079466   | G | A | 0.204 | -0.418 | 0.032 | 1.4E-39  | Sun |
| Plasma | NCAM1  | P13591;A0A08<br>7WWD4                      | rs11214489  | 11 | 112975934 | C | T | 0.818 | 0.368  | 0.024 | 3.01E-54 | Yao |
| Plasma | NELL1  | B3KXR2;J3KN<br>C5;K9UUD5;Q<br>92832;F5H6I3 | rs61652119  | 11 | 20955270  | A | G | 0.049 | 1.110  | 0.055 | 1.3E-89  | Sun |
| Plasma | NEO1   | Q59FP8;Q9285<br>9                          | rs12903656  | 15 | 73326961  | C | G | 0.101 | 0.286  | 0.042 | 5.5E-12  | Sun |
| Plasma | NFASC  | O94856;B4DR<br>H7                          | rs6667532   | 1  | 204948659 | G | A | 0.105 | 0.823  | 0.039 | 4.1E-100 | Sun |
| Plasma | NID2   | Q14112                                     | rs1151582   | 14 | 52482768  | T | C | 0.457 | -0.394 | 0.023 | 2.6E-64  | Sun |
| Plasma | NMRAL1 | Q9HBL8                                     | rs11557236  | 16 | 4519439   | A | G | 0.082 | -0.491 | 0.044 | 1.5E-28  | Sun |
| Plasma | NOG    | Q13253                                     | rs79084672  | 17 | 54856140  | G | A | 0.012 | 1.237  | 0.115 | 8.7E-27  | Sun |
| Plasma | NOV    | A0A024R9J4;P<br>48745                      | rs58936256  | 8  | 120422799 | C | T | 0.215 | 0.209  | 0.030 | 4.2E-12  | Sun |
| Plasma | NPPB   | P16860                                     | rs198379    | 1  | 11915467  | T | C | 0.608 | -0.266 | 0.024 | 1.58E-41 | Yao |
| Plasma | NPTX1  | Q15818                                     | rs62069681  | 17 | 78624702  | C | T | 0.093 | 0.514  | 0.042 | 7.6E-35  | Sun |

|               |        |                                                                   |             |    |           |   |   |       |        |       |          |     |
|---------------|--------|-------------------------------------------------------------------|-------------|----|-----------|---|---|-------|--------|-------|----------|-----|
| <b>Plasma</b> | NPW    | Q8N729                                                            | rs35327014  | 16 | 2076202   | G | A | 0.231 | -0.427 | 0.029 | 1.6E-49  | Sun |
| <b>Plasma</b> | NQO1   | P15559;B4DLR<br>8                                                 | rs77944668  | 16 | 69718112  | A | G | 0.193 | -0.750 | 0.028 | 1.6E-154 | Sun |
| <b>Plasma</b> | NRP1   | O14786;Q68D<br>N3;A8K9V7;Q<br>59F20;Q6X907;<br>Q6AWA9             | rs2506149   | 10 | 33480713  | T | C | 0.358 | -0.281 | 0.026 | 6.9E-28  | Sun |
| <b>Plasma</b> | NRP2   | O60462;Q7LB<br>X6;Q7Z3T9;X5<br>D2Q8;A0A024<br>R412;A0A024R<br>3W6 | rs16837641  | 2  | 206634869 | A | G | 0.322 | 0.209  | 0.027 | 1.1E-14  | Sun |
| <b>Plasma</b> | NT5C   | Q8TCD5;V9H<br>WF3                                                 | rs78625720  | 17 | 73140941  | A | G | 0.030 | -0.753 | 0.072 | 1.2E-25  | Sun |
| <b>Plasma</b> | NTN1   | O95631                                                            | rs72809988  | 17 | 8986397   | A | G | 0.110 | -0.579 | 0.038 | 1.6E-52  | Sun |
| <b>Plasma</b> | NTN4   | A8K3H6;B2RE<br>43;Q9HB63                                          | rs17288108  | 12 | 96131895  | G | A | 0.182 | -0.278 | 0.032 | 7.2E-18  | Sun |
| <b>Plasma</b> | NTNG1  | Q5IEC3;Q5IEC<br>8;Q9Y2I2;X5D<br>NW2;B4DKF0                        | rs115668827 | 1  | 107678268 | C | G | 0.049 | 1.004  | 0.057 | 1.1E-70  | Sun |
| <b>Plasma</b> | NUDT12 | B4E1W3;E7E<br>M93;Q9BQG2                                          | rs74692061  | 5  | 102903643 | G | A | 0.157 | -0.376 | 0.034 | 2.8E-28  | Sun |
| <b>Plasma</b> | NUDT9  | Q96KB3;Q9B<br>W91;A0A024R<br>DI6;Q8NG26                           | rs28696943  | 4  | 88310135  | G | A | 0.167 | -0.357 | 0.032 | 2.3E-28  | Sun |
| <b>Plasma</b> | OAF    | Q86UD1                                                            | rs117554512 | 11 | 120098329 | T | C | 0.086 | 0.682  | 0.043 | 2.1E-56  | Sun |
| <b>Plasma</b> | OAS1   | P00973;F8VXY<br>3                                                 | rs4767027   | 12 | 113359157 | C | T | 0.654 | -0.270 | 0.026 | 6.2E-26  | Sun |
| <b>Plasma</b> | OBP2B  | Q9NPH6                                                            | rs4454354   | 9  | 136089529 | C | T | 0.786 | 0.358  | 0.030 | 2.7E-33  | Sun |
| <b>Plasma</b> | ORM1   | P02763                                                            | rs116994374 | 9  | 117084672 | G | A | 0.940 | -0.409 | 0.054 | 2.55E-14 | Yao |
| <b>Plasma</b> | OSMR   | Q99650                                                            | rs357253    | 5  | 38907422  | T | C | 0.232 | 0.209  | 0.029 | 8.3E-13  | Sun |
| <b>Plasma</b> | PAM    | P19021;O43832                                                     | rs257309    | 5  | 102418604 | G | A | 0.352 | -0.466 | 0.025 | 3.8E-79  | Sun |
| <b>Plasma</b> | PATE4  | P0C8F1                                                            | rs875500    | 11 | 125698654 | A | T | 0.720 | -0.482 | 0.026 | 1E-75    | Sun |

|        |          |                                         |            |    |           |   |   |       |        |       |           |       |
|--------|----------|-----------------------------------------|------------|----|-----------|---|---|-------|--------|-------|-----------|-------|
| Plasma | PCOLCE   | Q15113                                  | rs9801017  | 7  | 100236202 | A | G | 0.636 | 0.211  | 0.025 | 1E-16     | Sun   |
| Plasma | PCOLCE2  | Q9UKZ9                                  | rs34516933 | 3  | 142603861 | A | T | 0.356 | 0.422  | 0.025 | 5.4E-66   | Sun   |
| Plasma | PCSK1    | P29120                                  | rs6234     | 5  | 95728974  | C | G | 0.260 | -1.098 | 0.021 | 1E-200    | Sun   |
| Plasma | PDCD1LG2 | Q9BQ51                                  | rs16923189 | 9  | 5510644   | G | A | 0.298 | 0.388  | 0.026 | 7.9E-51   | Sun   |
| Plasma | PDCD5    | O14737                                  | rs4499344  | 19 | 33073431  | A | G | 0.291 | 0.354  | 0.027 | 1.2E-39   | Sun   |
| Plasma | PDE5A    | O76074;G5E9C<br>5                       | rs4834770  | 4  | 120241849 | A | G | 0.434 | -0.314 | 0.045 | 3.633E-12 | Suhre |
| Plasma | PDGFD    | Q9GZP0                                  | rs7950273  | 11 | 104031598 | G | C | 0.288 | -0.275 | 0.027 | 1.4E-24   | Sun   |
| Plasma | PDGFRB   | P09619;Q59F0<br>4                       | rs2304058  | 5  | 149508544 | G | C | 0.557 | 0.931  | 0.020 | 1E-200    | Sun   |
| Plasma | PDIA5    | Q14554                                  | rs2278668  | 3  | 122835232 | C | T | 0.593 | -0.522 | 0.023 | 4E-110    | Sun   |
| Plasma | PEAR1    | Q5VY43                                  | rs12137505 | 1  | 156883546 | G | A | 0.406 | -0.223 | 0.025 | 8.1E-19   | Sun   |
| Plasma | PENK     | A0A024R7V4;<br>P01210                   | rs2670014  | 8  | 57376781  | T | C | 0.474 | -0.465 | 0.023 | 1.3E-87   | Sun   |
| Plasma | PF4V1    | P10720                                  | rs941758   | 4  | 74718941  | A | C | 0.708 | -0.494 | 0.025 | 6.6E-85   | Sun   |
| Plasma | PGLYRP1  | O75594                                  | rs8102493  | 19 | 46530389  | C | T | 0.333 | -0.217 | 0.026 | 5.1E-17   | Sun   |
| Plasma | PGM1     | B7Z6C2;P3687<br>1;B4DDQ8                | rs1126728  | 1  | 64097432  | T | C | 0.228 | 0.287  | 0.029 | 2.8E-23   | Sun   |
| Plasma | PI3      | P19957                                  | rs16989763 | 20 | 43779963  | C | T | 0.195 | 0.376  | 0.030 | 1.6E-35   | Sun   |
| Plasma | PIANP    | Q8IYJ0                                  | rs11064321 | 12 | 6809896   | C | G | 0.397 | 0.226  | 0.027 | 5E-17     | Sun   |
| Plasma | PIGR     | P01833                                  | rs2007272  | 1  | 207113755 | C | G | 0.426 | -0.205 | 0.025 | 1.4E-16   | Sun   |
| Plasma | PLA2G2A  | A0A024RA96;<br>P14555                   | rs11573156 | 1  | 20306146  | C | G | 0.232 | 1.021  | 0.024 | 1E-200    | Sun   |
| Plasma | PLA2R1   | Q13018;B7ZM<br>L4                       | rs3749117  | 2  | 160885442 | C | T | 0.501 | -0.902 | 0.019 | 1E-200    | Sun   |
| Plasma | PLAU     | P00749;Q59GZ<br>8;B4DNJ4;A0A<br>024QZM9 | rs2227551  | 10 | 75669190  | T | G | 0.716 | -0.244 | 0.027 | 5.4E-20   | Sun   |
| Plasma | PLEKHA7  | E9PKC0;Q6IQ<br>23                       | rs382280   | 11 | 16857799  | T | C | 0.121 | 0.277  | 0.040 | 4.8E-12   | Sun   |

|        |              |                                     |             |    |           |   |   |       |        |       |           |       |
|--------|--------------|-------------------------------------|-------------|----|-----------|---|---|-------|--------|-------|-----------|-------|
| Plasma | PLG          | P00747;Q5TEH5                       | rs783150    | 6  | 161226939 | T | C | 0.114 | -0.517 | 0.066 | 8.7E-15   | Suhre |
| Plasma | PLXNB2       | O15031                              | rs28573806  | 22 | 50727792  | C | T | 0.400 | 0.532  | 0.023 | 3.5E-116  | Sun   |
| Plasma | PLXNC1       | O60486                              | rs115651556 | 12 | 94613898  | A | G | 0.014 | -2.145 | 0.101 | 2.1E-100  | Sun   |
| Plasma | PLXNC1       | O60486                              | rs7972001   | 12 | 94623502  | T | C | 0.034 | -1.005 | 0.123 | 7.773E-16 | Suhre |
| Plasma | POFUT1       | Q9H488                              | rs76143353  | 20 | 30815755  | T | C | 0.060 | -0.800 | 0.050 | 9.3E-58   | Sun   |
| Plasma | POGLUT1      | Q8NBL1;B4DJ97                       | rs75203710  | 3  | 119121679 | C | T | 0.070 | 0.394  | 0.048 | 3.8E-16   | Sun   |
| Plasma | POMGNT2      | A0A024R2P4;Q8NAT1                   | rs729654    | 3  | 43147652  | T | C | 0.473 | -0.256 | 0.024 | 9.3E-27   | Sun   |
| Plasma | PPA1         | Q15181;V9HWB5                       | rs10823500  | 10 | 72005190  | G | A | 0.371 | 0.401  | 0.045 | 1.525E-18 | Suhre |
| Plasma | PPID         | E5KN55;Q08752                       | rs8396      | 4  | 159630817 | C | T | 0.286 | 0.501  | 0.046 | 3.395E-26 | Suhre |
| Plasma | PPIE         | Q9UNP9;B3KSZ1                       | rs12086750  | 1  | 40210468  | C | G | 0.371 | -0.383 | 0.025 | 4.8E-53   | Sun   |
| Plasma | PPIL1        | A0A024RCX8;Q9Y3C6                   | rs12194408  | 6  | 36839598  | G | C | 0.030 | -1.106 | 0.071 | 1.9E-55   | Sun   |
| Plasma | PPP3CA;PP3R1 | A0A0S2Z4C6;Q08209;A0A0S2Z4B5;P63098 | rs17266357  | 4  | 102721809 | C | T | 0.310 | 0.368  | 0.045 | 8.67E-16  | Suhre |
| Plasma | PPT1         | P50897                              | rs7533094   | 1  | 40559686  | A | G | 0.042 | -0.862 | 0.060 | 2.3E-46   | Sun   |
| Plasma | PRCP         | B7Z7Q6;P42785;A0A024R5L0            | rs2229437   | 11 | 82564294  | G | T | 0.181 | 0.291  | 0.032 | 2.8E-20   | Sun   |
| Plasma | PRSS22       | Q9GZN4                              | rs3810801   | 16 | 2892370   | A | C | 0.333 | 0.307  | 0.026 | 3.7E-33   | Sun   |
| Plasma | PRTN3        | P24158                              | rs10425544  | 19 | 836043    | C | T | 0.713 | 0.599  | 0.027 | 8.3E-110  | Sun   |
| Plasma | PSAPL1       | Q6NUJ1                              | rs10023470  | 4  | 7434456   | G | A | 0.184 | 0.548  | 0.031 | 2.6E-71   | Sun   |
| Plasma | PSG3         | Q16557                              | rs2355433   | 19 | 43679088  | G | A | 0.548 | -0.652 | 0.024 | 1.6E-163  | Sun   |
| Plasma | PSG4         | B3KQL2;Q96QL5;Q6P520;Q00888         | rs1138888   | 19 | 43696022  | A | T | 0.624 | -0.666 | 0.025 | 5.4E-163  | Sun   |

|        |         |                                  |            |    |           |   |   |       |        |       |           |       |
|--------|---------|----------------------------------|------------|----|-----------|---|---|-------|--------|-------|-----------|-------|
| Plasma | PTGDS   | A0A024R8G3;<br>P41222            | rs7019538  | 9  | 139861470 | C | T | 0.524 | 0.198  | 0.025 | 7.8E-16   | Sun   |
| Plasma | PTGFRN  | Q9P2B2                           | rs4233450  | 1  | 117490261 | T | G | 0.829 | 1.001  | 0.028 | 1E-200    | Sun   |
| Plasma | PTHLH   | P12272;Q53XY<br>9;A0A024RB29     | rs10843115 | 12 | 28307717  | T | C | 0.271 | 0.186  | 0.028 | 1.4E-11   | Sun   |
| Plasma | PTN     | A0A024R778;P<br>21246            | rs1431093  | 7  | 137016297 | A | C | 0.419 | 0.220  | 0.025 | 7.9E-19   | Sun   |
| Plasma | QDPR    | A0A140VKA9;<br>P09417            | rs28719835 | 4  | 17520066  | T | C | 0.243 | -0.567 | 0.028 | 1E-94     | Sun   |
| Plasma | QPCTL   | Q9NXS2                           | rs17850756 | 19 | 46206262  | A | G | 0.328 | -0.288 | 0.026 | 1.6E-28   | Sun   |
| Plasma | QSOX1   | A0A140VKE5;<br>O00391;Q1387<br>6 | rs12371    | 1  | 180163390 | G | A | 0.089 | 0.700  | 0.043 | 1.3E-60   | Sun   |
| Plasma | QSOX2   | Q6ZRP7                           | rs10858248 | 9  | 139108324 | G | A | 0.502 | -0.357 | 0.024 | 1.5E-50   | Sun   |
| Plasma | RARRES1 | P49788                           | rs61696028 | 3  | 158455703 | C | A | 0.146 | 1.337  | 0.027 | 1E-200    | Sun   |
| Plasma | RARRES2 | A0A090N7U9;<br>Q99969            | rs9640161  | 7  | 150045910 | A | C | 0.371 | 0.347  | 0.042 | 3.049E-16 | Suhre |
| Plasma | REG1A   | A8K7G6;P0545<br>1                | rs11126696 | 2  | 79323888  | G | A | 0.612 | 0.265  | 0.021 | 2.18E-40  | Yao   |
| Plasma | REG4    | A0A024R0M1;<br>Q9BYZ8            | rs79795228 | 1  | 120359286 | A | C | 0.015 | 0.794  | 0.100 | 1.4E-15   | Sun   |
| Plasma | RELT    | A0A024R5N3;<br>Q969Z4            | rs7952686  | 11 | 73128503  | T | C | 0.204 | 0.413  | 0.029 | 3.1E-45   | Sun   |
| Plasma | RET     | P07949;Q9BTX<br>6;A0A024R7T2     | rs2795507  | 10 | 43352894  | C | T | 0.796 | -0.277 | 0.031 | 1.1E-19   | Sun   |
| Plasma | RETN    | Q9HD89                           | rs34124816 | 19 | 7733676   | C | A | 0.038 | -0.608 | 0.065 | 4.4E-21   | Sun   |
| Plasma | RFESD   | Q8TAC1;A0A0<br>24RAR3            | rs77881626 | 5  | 95017852  | G | T | 0.048 | -0.597 | 0.057 | 2.1E-25   | Sun   |
| Plasma | RGMA    | A0A0A0MTQ4<br>;Q96B86            | rs3752102  | 15 | 93616014  | A | C | 0.473 | -0.201 | 0.025 | 2.5E-16   | Sun   |
| Plasma | RGMB    | J3KNF6;Q6NW<br>40                | rs1563317  | 5  | 97768486  | G | A | 0.553 | 0.216  | 0.025 | 1.2E-18   | Sun   |
| Plasma | RIDA    | A0A024R9H2;<br>P52758            | rs1462977  | 8  | 99115359  | G | A | 0.323 | -0.339 | 0.026 | 2.2E-39   | Sun   |



|        |        |                                         |            |    |           |   |   |       |        |       |           |       |
|--------|--------|-----------------------------------------|------------|----|-----------|---|---|-------|--------|-------|-----------|-------|
| Plasma | RMDN1  | Q6N086;Q96D<br>B5;E5RH53                | rs11781016 | 8  | 87529297  | C | A | 0.489 | 0.317  | 0.024 | 8.3E-39   | Sun   |
| Plasma | RNASE1 | P07998;W0UV<br>93                       | rs17254387 | 14 | 21280678  | A | G | 0.688 | 0.230  | 0.027 | 3E-17     | Sun   |
| Plasma | RNASE2 | P10153;W0UV<br>60                       | rs56204594 | 14 | 21433367  | C | A | 0.464 | 0.237  | 0.024 | 3.2E-22   | Sun   |
| Plasma | RNASE4 | P34096;Q53XB<br>4                       | rs12588573 | 14 | 21146584  | T | C | 0.224 | -0.449 | 0.029 | 8.9E-54   | Sun   |
| Plasma | RNASE6 | Q61B39;Q9309<br>1                       | rs11622942 | 14 | 21250846  | T | G | 0.233 | 0.997  | 0.024 | 1E-200    | Sun   |
| Plasma | ROR1   | Q01973                                  | rs1408416  | 1  | 64614495  | T | G | 0.162 | -0.440 | 0.033 | 1.8E-40   | Sun   |
| Plasma | RPN1   | P04843                                  | rs2712417  | 3  | 128345179 | G | A | 0.618 | -0.345 | 0.025 | 3.1E-44   | Sun   |
| Plasma | RRM2B  | Q7LG56                                  | rs74589258 | 8  | 103215228 | G | A | 0.070 | 0.325  | 0.048 | 1.1E-11   | Sun   |
| Plasma | RSPO3  | Q9BXY4                                  | rs2489623  | 6  | 127455821 | C | A | 0.535 | 0.270  | 0.025 | 3.6E-28   | Sun   |
| Plasma | RTN4R  | Q9BZR6                                  | rs75766    | 22 | 20174853  | A | C | 0.748 | -0.350 | 0.028 | 4.8E-35   | Sun   |
| Plasma | S100A4 | P26447                                  | rs58056804 | 1  | 153524706 | A | G | 0.050 | 0.505  | 0.057 | 4.5E-19   | Sun   |
| Plasma | SCARF1 | A8K6Z5;Q1416<br>2                       | rs8071756  | 17 | 1574342   | G | A | 0.224 | 0.590  | 0.049 | 9.358E-31 | Suhre |
| Plasma | SCARF2 | A0A096LNX8;<br>Q96GP6                   | rs738086   | 22 | 20775556  | T | G | 0.811 | 0.300  | 0.032 | 4.8E-21   | Sun   |
| Plasma | SCG3   | Q8WXD2                                  | rs1378892  | 15 | 51964865  | C | T | 0.764 | 0.486  | 0.028 | 1E-68     | Sun   |
| Plasma | SECTM1 | Q8WVN6                                  | rs4789763  | 17 | 80289284  | G | A | 0.493 | 0.281  | 0.025 | 3.8E-30   | Sun   |
| Plasma | SELL   | A0A024R8Z0;P<br>14151                   | rs4987358  | 1  | 169665551 | T | G | 0.274 | -0.517 | 0.026 | 6.8E-87   | Sun   |
| Plasma | SELP   | A0A024R8Y9;<br>P16109;Q6NU<br>L9;Q5R341 | rs6136     | 1  | 169563951 | G | T | 0.108 | -0.807 | 0.037 | 3E-105    | Sun   |
| Plasma | SEMA3C | B4E2I9;Q9998<br>5                       | rs1019016  | 7  | 80570562  | T | G | 0.581 | 0.175  | 0.025 | 1.6E-12   | Sun   |
| Plasma | SEMA3E | O15041                                  | rs3757607  | 7  | 83034362  | C | G | 0.122 | -1.120 | 0.032 | 1E-200    | Sun   |
| Plasma | SEMA3G | Q9NS98                                  | rs2016575  | 3  | 52477080  | C | T | 0.816 | -0.269 | 0.032 | 1.9E-17   | Sun   |
| Plasma | SEMA5A | Q13591;X5DR<br>95                       | rs17329170 | 5  | 9547242   | A | G | 0.101 | 1.432  | 0.032 | 1E-200    | Sun   |

|        |          |                                 |             |    |           |   |   |       |        |       |           |       |
|--------|----------|---------------------------------|-------------|----|-----------|---|---|-------|--------|-------|-----------|-------|
| Plasma | SERPINA1 | E9KL23;P01009                   | rs2749534   | 14 | 94809760  | G | A | 0.201 | 0.427  | 0.054 | 5.551E-15 | Suhre |
| Plasma | SERPINA3 | A0A024R6P0;P01011               | rs6575449   | 14 | 95097303  | T | C | 0.186 | -0.432 | 0.054 | 1.903E-15 | Suhre |
| Plasma | SERPINA4 | P29622;A0A024R6I9               | rs10135681  | 14 | 95007744  | C | T | 0.395 | 0.277  | 0.042 | 8.416E-11 | Suhre |
| Plasma | SERPINA4 | P29622;A0A024R6I9               | rs10139745  | 14 | 95035374  | A | G | 0.221 | 0.617  | 0.028 | 4.9E-110  | Sun   |
| Plasma | SERPINE2 | A0A024R498;P07093;A0A024R451    | rs68066031  | 2  | 224880498 | C | T | 0.258 | -0.426 | 0.030 | 1.1E-46   | Sun   |
| Plasma | SERPINF1 | A0A140VKF3;P36955               | rs62088172  | 17 | 1666253   | T | C | 0.345 | -0.445 | 0.025 | 1.8E-70   | Sun   |
| Plasma | SERPINF2 | P08697                          | rs11657394  | 17 | 1636950   | A | C | 0.077 | -0.346 | 0.048 | 5.4E-13   | Sun   |
| Plasma | SIGLEC12 | Q96PQ1                          | rs3826667   | 19 | 52004074  | T | C | 0.835 | -1.127 | 0.028 | 1E-200    | Sun   |
| Plasma | SIGLEC14 | Q08ET2                          | rs1106476   | 19 | 52130637  | A | T | 0.117 | -1.192 | 0.032 | 1E-200    | Sun   |
| Plasma | SIGLEC6  | O43699;A0A024R4K4               | rs2124910   | 19 | 52025247  | T | C | 0.407 | 0.653  | 0.043 | 2.748E-46 | Suhre |
| Plasma | SIGLEC7  | Q9Y286                          | rs140185670 | 19 | 51646140  | C | G | 0.080 | -0.609 | 0.048 | 1.7E-36   | Sun   |
| Plasma | SIGLEC9  | Q9Y336                          | rs2075803   | 19 | 51628529  | G | A | 0.551 | -1.226 | 0.012 | 1E-200    | Sun   |
| Plasma | SIRPA    | P78324                          | rs6136377   | 20 | 1896288   | G | A | 0.369 | -1.211 | 0.015 | 1E-200    | Sun   |
| Plasma | SIRPB1   | O00241;Q5TFQ8;H9KV29            | rs3848788   | 20 | 1543066   | A | G | 0.305 | 0.745  | 0.024 | 1E-200    | Sun   |
| Plasma | SIRPG    | Q9P1W8                          | rs6043409   | 20 | 1616206   | G | A | 0.652 | 0.263  | 0.026 | 8.1E-24   | Sun   |
| Plasma | SLAMF7   | Q9NQ25;B4DVL7;B4DW98            | rs11581248  | 1  | 160720074 | T | C | 0.142 | -1.260 | 0.030 | 1E-200    | Sun   |
| Plasma | SMOC1    | Q9H4F8;A0A024R6E0               | rs1958078   | 14 | 70354858  | C | A | 0.834 | 0.377  | 0.033 | 1.8E-30   | Sun   |
| Plasma | SNCA     | P37840;H6UYS5                   | rs2245801   | 4  | 90757840  | C | T | 0.788 | -0.251 | 0.030 | 1.2E-16   | Sun   |
| Plasma | SPARCL1  | A0A024RDE1;Q14515;B7ZB68;Q8N4S1 | rs7681694   | 4  | 88462729  | A | G | 0.337 | 0.532  | 0.024 | 2.7E-105  | Sun   |

|        |         |                                                        |            |    |           |   |   |       |        |       |           |       |
|--------|---------|--------------------------------------------------------|------------|----|-----------|---|---|-------|--------|-------|-----------|-------|
| Plasma | SPARCL1 | A0A024RDE1;<br>Q14515;B7ZB6<br>8;Q8N4S1                | rs1462372  | 4  | 88478750  | C | T | 0.327 | 0.321  | 0.046 | 6.309E-12 | Suhre |
| Plasma | SPATA20 | Q8TB22                                                 | rs9890200  | 17 | 48624523  | C | A | 0.376 | -0.253 | 0.025 | 8.7E-24   | Sun   |
| Plasma | SPINK2  | D6RI10;D6RC5<br>1;P20155;A0A0<br>87WTA9;A0A0<br>24RD95 | rs11941335 | 4  | 57689460  | T | C | 0.021 | 1.000  | 0.083 | 2.2E-33   | Sun   |
| Plasma | SPINK6  | Q6UWN8                                                 | rs1432688  | 5  | 147603178 | G | A | 0.924 | 1.058  | 0.043 | 7.6E-135  | Sun   |
| Plasma | SPINT2  | A0A140VJV6;<br>O43291                                  | rs71354995 | 19 | 38791841  | G | A | 0.243 | -0.991 | 0.023 | 1E-200    | Sun   |
| Plasma | SPINT3  | P49223                                                 | rs6017591  | 20 | 44141041  | C | T | 0.541 | 0.543  | 0.023 | 6E-127    | Sun   |
| Plasma | SPOCK2  | Q92563;A0A02<br>4QZQ5                                  | rs1245540  | 10 | 73849752  | T | C | 0.449 | 0.218  | 0.024 | 3.3E-19   | Sun   |
| Plasma | SPOCK3  | Q9BQ16;A0A0<br>A0MTJ2;B4DI<br>52                       | rs17599599 | 4  | 167961738 | A | G | 0.028 | 0.848  | 0.077 | 1.5E-28   | Sun   |
| Plasma | SPON1   | Q9HCB6                                                 | rs10832169 | 11 | 14066486  | A | G | 0.491 | 0.375  | 0.024 | 1.3E-55   | Sun   |
| Plasma | ST3GAL1 | A0A024R9L6;<br>Q11201                                  | rs9643300  | 8  | 134503148 | T | C | 0.563 | -0.257 | 0.025 | 1.4E-25   | Sun   |
| Plasma | ST3GAL6 | A0A087WXB8;<br>Q9Y274                                  | rs72934623 | 3  | 98509705  | A | G | 0.053 | -1.878 | 0.045 | 1E-200    | Sun   |
| Plasma | SVEP1   | B3KQM1;Q4L<br>DE5;Q5JB40                               | rs61751937 | 9  | 113312231 | C | G | 0.030 | 1.185  | 0.070 | 5.2E-64   | Sun   |
| Plasma | SWAP70  | B3KUB9;E7E<br>MB1;Q9UH65                               | rs415895   | 11 | 9769562   | G | C | 0.650 | -0.266 | 0.026 | 3.5E-25   | Sun   |
| Plasma | TAPBPL  | Q9BX59                                                 | rs2532497  | 12 | 6564210   | A | G | 0.274 | 1.258  | 0.016 | 1E-200    | Sun   |
| Plasma | TCN1    | P20061                                                 | rs34528912 | 11 | 59631535  | T | C | 0.042 | -0.711 | 0.062 | 4.6E-30   | Sun   |
| Plasma | TCN2    | P20062                                                 | rs4820885  | 22 | 31012756  | C | T | 0.549 | -0.725 | 0.021 | 1E-200    | Sun   |
| Plasma | TEK     | Q02763;Q59H<br>G2                                      | rs35030851 | 9  | 27197486  | T | G | 0.047 | 0.557  | 0.057 | 1.4E-22   | Sun   |
| Plasma | TEPSIN  | Q96N21;A0A1<br>B0GV70                                  | rs61745945 | 17 | 79205421  | A | G | 0.016 | -0.877 | 0.099 | 5.9E-19   | Sun   |
| Plasma | TFF1    | P04155                                                 | rs3761376  | 21 | 43787038  | A | G | 0.242 | -0.220 | 0.029 | 3.9E-14   | Sun   |

|        |                                 |                                  |             |    |           |   |   |       |        |       |           |       |
|--------|---------------------------------|----------------------------------|-------------|----|-----------|---|---|-------|--------|-------|-----------|-------|
| Plasma | TGFBI                           | A0A0S2Z4Q2;<br>Q15582            | rs13159365  | 5  | 135389433 | T | C | 0.507 | -0.446 | 0.024 | 5E-78     | Sun   |
| Plasma | THBS2                           | P35442                           | rs73043857  | 6  | 169624900 | G | A | 0.102 | 0.808  | 0.038 | 6.9E-99   | Sun   |
| Plasma | THSD1                           | A0A024R064;B<br>3KTY7;Q9NS6<br>2 | rs41292808  | 13 | 52971517  | T | C | 0.027 | 0.906  | 0.076 | 5.5E-33   | Sun   |
| Plasma | TIE1                            | B4DTW8;P355<br>90                | rs2275180   | 1  | 43773033  | G | A | 0.623 | 0.254  | 0.025 | 4.8E-24   | Sun   |
| Plasma | TIMP3                           | P35625                           | rs2097326   | 22 | 33165020  | G | A | 0.279 | 0.931  | 0.040 | 4.424E-97 | Suhre |
| Plasma | TIMP4                           | Q99727                           | rs454615    | 3  | 12077010  | C | T | 0.831 | 0.490  | 0.032 | 1.7E-53   | Sun   |
| Plasma | TIRAP                           | A0A024R3M4;<br>P58753            | rs111577916 | 11 | 126071349 | T | G | 0.025 | -0.571 | 0.077 | 1.6E-13   | Sun   |
| Plasma | TLR4;LY96                       | O00206;Q9Y6<br>Y9                | rs4986790   | 9  | 120475302 | G | A | 0.056 | -0.902 | 0.051 | 2.8E-70   | Sun   |
| Plasma | TMEM132A                        | Q24JP5                           | rs11230521  | 11 | 60698732  | A | G | 0.231 | 0.618  | 0.027 | 2E-112    | Sun   |
| Plasma | TMEM132C                        | Q8N3T6                           | rs11059617  | 12 | 128757909 | T | A | 0.335 | -0.225 | 0.026 | 2.2E-18   | Sun   |
| Plasma | TMEM190                         | Q8WZ59                           | rs4806666   | 19 | 55888095  | T | C | 0.438 | -0.997 | 0.018 | 1E-200    | Sun   |
| Plasma | TNFAIP6                         | P98066                           | rs289828    | 2  | 152137181 | T | C | 0.622 | -0.548 | 0.024 | 5.5E-118  | Sun   |
| Plasma | TNFRSF11A                       | Q9Y6Q6                           | rs884205    | 18 | 60054857  | C | A | 0.756 | -0.224 | 0.029 | 2E-14     | Sun   |
| Plasma | TNFRSF6B                        | O95407                           | rs62217798  | 20 | 62347189  | T | G | 0.784 | -0.224 | 0.032 | 1.4E-12   | Sun   |
| Plasma | TNFSF12;T<br>NFSF12-<br>TNFSF13 | O43508;Q4AC<br>W9;A0A0A6Y<br>Y99 | rs12941509  | 17 | 7448288   | G | C | 0.279 | 0.393  | 0.027 | 2.2E-49   | Sun   |
| Plasma | TPSAB1;TP<br>SB2                | P20231;Q15661<br>;A0A140VJT7     | rs4984778   | 16 | 1297516   | C | G | 0.285 | 0.517  | 0.046 | 2.678E-27 | Suhre |
| Plasma | TPST1                           | A0A024RDK9;<br>O60507            | rs313829    | 7  | 65552497  | G | A | 0.689 | 0.231  | 0.026 | 1.1E-18   | Sun   |
| Plasma | TPST2                           | A0A024R1G9;<br>O60704            | rs2283824   | 22 | 26924456  | A | G | 0.417 | 0.243  | 0.025 | 6E-23     | Sun   |
| Plasma | TREML2                          | Q5T2D2                           | rs61998254  | 6  | 41166151  | G | A | 0.127 | 0.693  | 0.035 | 5E-86     | Sun   |

|               |         |                                                                |            |    |           |   |   |       |        |       |          |          |
|---------------|---------|----------------------------------------------------------------|------------|----|-----------|---|---|-------|--------|-------|----------|----------|
| <b>Plasma</b> | UCMA    | A0A067XJP8;<br>Q8WVF2;A0A<br>067XKV3;A0A<br>067XJX6            | rs2093847  | 10 | 13276534  | T | C | 0.107 | -0.586 | 0.038 | 3.1E-53  | Sun      |
| <b>Plasma</b> | UNC5C   | A8K385;O9518<br>5                                              | rs57091121 | 4  | 96444053  | T | A | 0.337 | 0.269  | 0.026 | 1.9E-25  | Sun      |
| <b>Plasma</b> | UROS    | A0A0S2Z4T8;P<br>10746;A0A0S2<br>Z5C5;Q5T3L8                    | rs10794029 | 10 | 127561568 | G | A | 0.794 | -0.233 | 0.031 | 7.6E-14  | Sun      |
| <b>Plasma</b> | VEGFA   | P15692;A0A02<br>4RD33;A0A02<br>4RD37;A0A0Y<br>0IMM4;A2A2V<br>4 | rs6921438  | 6  | 43925607  | A | G | 0.497 | -0.702 | 0.022 | 1E-200   | Sun      |
| <b>Plasma</b> | VEGFC   | P49767                                                         | rs41278571 | 4  | 177650866 | T | C | 0.010 | 1.742  | 0.122 | 1.3E-46  | Sun      |
| <b>Plasma</b> | VIT     | Q6UXI7                                                         | rs10490666 | 2  | 36932493  | T | A | 0.304 | 0.347  | 0.026 | 1.9E-39  | Sun      |
| <b>Plasma</b> | VSIR    | Q9H7M9                                                         | rs10762477 | 10 | 73531069  | G | A | 0.148 | 0.271  | 0.035 | 1.7E-14  | Sun      |
| <b>Plasma</b> | WFIKKN2 | C9J6G4;Q8TE<br>U8                                              | rs7225465  | 17 | 48916159  | A | G | 0.682 | -0.653 | 0.024 | 9.3E-166 | Sun      |
| <b>Plasma</b> | WISP1   | O95388                                                         | rs35472615 | 8  | 134197537 | A | G | 0.274 | 0.511  | 0.026 | 1.7E-84  | Sun      |
| <b>Plasma</b> | XCL1    | P47992                                                         | rs4656599  | 1  | 168503386 | T | C | 0.190 | 0.430  | 0.031 | 2E-43    | Sun      |
| <b>Plasma</b> | ACE     | P12821                                                         | rs4344     | 17 | 61566724  | A | G | 0.499 | -0.583 | 0.022 | 8.5E-136 | Emilsson |
| <b>Plasma</b> | ACHE    | P22303                                                         | rs4727469  | 7  | 100509163 | C | T | 0.524 | -0.297 | 0.023 | 7.5E-37  | Emilsson |
| <b>Plasma</b> | ACP6    | Q9NPH0                                                         | rs2153463  | 1  | 147124310 | G | T | 0.739 | 0.944  | 0.022 | 1E-200   | Emilsson |
| <b>Plasma</b> | ADAM12  | O43184                                                         | rs10794057 | 10 | 127729734 | T | C | 0.398 | -0.209 | 0.025 | 1.2E-16  | Emilsson |
| <b>Plasma</b> | ADAM19  | Q9H013                                                         | rs7728609  | 5  | 156935524 | C | T | 0.675 | 0.246  | 0.026 | 1.2E-21  | Emilsson |
| <b>Plasma</b> | ADAM22  | Q9P0K1                                                         | rs6966166  | 7  | 87455155  | T | C | 0.478 | -0.177 | 0.026 | 9.8E-12  | Emilsson |
| <b>Plasma</b> | ADH4    | P08319                                                         | rs1800759  | 4  | 100065509 | G | T | 0.622 | 0.157  | 0.025 | 4.1E-10  | Emilsson |
| <b>Plasma</b> | ADH5    | P11766                                                         | rs1453873  | 4  | 100022571 | C | T | 0.742 | -0.284 | 0.027 | 2.5E-25  | Emilsson |

|        |          |        |             |    |           |   |   |       |        |       |         |          |
|--------|----------|--------|-------------|----|-----------|---|---|-------|--------|-------|---------|----------|
| Plasma | ADH7     | P40394 | rs17529509  | 4  | 100351436 | C | A | 0.927 | 0.401  | 0.048 | 8E-17   | Emilsson |
| Plasma | ADIPOQ   | Q15848 | rs143257534 | 3  | 186551888 | C | T | 0.974 | 0.425  | 0.072 | 3.3E-09 | Emilsson |
| Plasma | AFP      | P02771 | rs6829551   | 4  | 74173715  | T | C | 0.812 | 0.187  | 0.031 | 2.4E-09 | Emilsson |
| Plasma | AKR7A2   | O43488 | rs144376466 | 1  | 19600538  | C | T | 0.912 | 0.436  | 0.042 | 1.9E-24 | Emilsson |
| Plasma | ALPG     | P10696 | rs10933394  | 2  | 233249080 | T | C | 0.642 | -0.192 | 0.026 | 1E-13   | Emilsson |
| Plasma | ALPP     | NA     | rs12478529  | 2  | 233286654 | C | T | 0.778 | -0.354 | 0.028 | 2.5E-35 | Emilsson |
| Plasma | AMY2B    | P19961 | rs17014913  | 1  | 104105635 | A | G | 0.839 | 0.433  | 0.034 | 3.2E-36 | Emilsson |
| Plasma | AOC1     | P19801 | rs10452848  | 7  | 150523544 | A | G | 0.498 | -0.765 | 0.021 | 1E-200  | Emilsson |
| Plasma | AP1G2    | O75843 | rs12897422  | 14 | 24033027  | G | A | 0.858 | 0.268  | 0.035 | 1.3E-14 | Emilsson |
| Plasma | APOA1    | P02647 | rs75507001  | 11 | 116577694 | C | A | 0.957 | 0.550  | 0.061 | 1.7E-19 | Emilsson |
| Plasma | APOBEC3G | Q9HC16 | rs738469    | 22 | 39510995  | A | G | 0.903 | 0.245  | 0.042 | 4.5E-09 | Emilsson |
| Plasma | APOF     | Q13790 | rs808919    | 12 | 56647911  | C | G | 0.903 | 0.321  | 0.040 | 6.9E-16 | Emilsson |
| Plasma | APOH     | P02749 | rs1801690   | 17 | 64208285  | C | G | 0.943 | 0.552  | 0.053 | 6.5E-25 | Emilsson |
| Plasma | ARHGAP1  | Q07960 | rs5899      | 11 | 46747662  | C | T | 0.989 | 0.835  | 0.111 | 8.4E-14 | Emilsson |
| Plasma | ASIP     | P42127 | rs62212171  | 20 | 32987687  | T | C | 0.890 | -0.814 | 0.037 | 9.6E-98 | Emilsson |
| Plasma | AZU1     | P20160 | rs351976    | 19 | 806673    | T | C | 0.709 | 0.216  | 0.027 | 1.5E-15 | Emilsson |
| Plasma | B3GALT6  | Q96L58 | rs3766186   | 1  | 1162435   | C | A | 0.899 | 0.271  | 0.041 | 6.5E-11 | Emilsson |
| Plasma | B3GLCT   | Q6Y288 | rs9544399   | 13 | 31885907  | A | G | 0.791 | 0.278  | 0.031 | 1.6E-19 | Emilsson |
| Plasma | B3GNT8   | Q7Z7M8 | rs284663    | 19 | 41932612  | T | C | 0.560 | 0.744  | 0.021 | 1E-200  | Emilsson |
| Plasma | B4GALT6  | Q9UBX8 | rs113222817 | 18 | 29216314  | T | G | 0.965 | 1.143  | 0.063 | 8.1E-71 | Emilsson |
| Plasma | BCAN     | Q96GW7 | rs7541549   | 1  | 156588439 | T | C | 0.767 | 0.201  | 0.029 | 5.6E-12 | Emilsson |

|        |          |        |             |    |           |   |   |       |        |       |             |          |
|--------|----------|--------|-------------|----|-----------|---|---|-------|--------|-------|-------------|----------|
| Plasma | BOC      | Q9BWV1 | rs73235147  | 3  | 112973955 | A | T | 0.833 | -0.241 | 0.032 | 1.1E-13     | Emilsson |
| Plasma | BPIFA2   | Q96DR5 | rs141715080 | 20 | 31742114  | C | T | 0.973 | 0.429  | 0.076 | 0.00000002  | Emilsson |
| Plasma | BTD      | P43251 | rs13100619  | 3  | 15549967  | A | C | 0.962 | 1.431  | 0.058 | 4.4E-122    | Emilsson |
| Plasma | BTNL8    | Q6UX41 | rs7721375   | 5  | 180439650 | C | T | 0.507 | 0.273  | 0.024 | 1.4E-28     | Emilsson |
| Plasma | C1QL1    | O75973 | rs9915692   | 17 | 43034207  | A | G | 0.463 | -0.279 | 0.023 | 3.4E-32     | Emilsson |
| Plasma | C1QTNF3  | Q9BXJ4 | rs840390    | 5  | 34018623  | G | A | 0.868 | 0.203  | 0.037 | 0.000000028 | Emilsson |
| Plasma | C1RL     | Q9NZP8 | rs6488561   | 12 | 7246894   | G | A | 0.695 | 0.270  | 0.027 | 5.6E-24     | Emilsson |
| Plasma | C3       | P01024 | rs163494    | 19 | 6724340   | C | T | 0.805 | 0.264  | 0.031 | 3.4E-17     | Emilsson |
| Plasma | C4BPA    | P04003 | rs11120218  | 1  | 207278451 | G | A | 0.889 | -0.429 | 0.038 | 1.5E-28     | Emilsson |
| Plasma | C5       | P01031 | rs1035029   | 9  | 123742818 | A | G | 0.611 | 0.182  | 0.025 | 2.1E-13     | Emilsson |
| Plasma | C9       | P02748 | rs265721    | 5  | 39354069  | G | A | 0.959 | -0.375 | 0.060 | 5.9E-10     | Emilsson |
| Plasma | CA1      | P00915 | rs2453868   | 8  | 86302696  | T | C | 0.582 | -0.147 | 0.025 | 2.2E-09     | Emilsson |
| Plasma | CA8      | P35219 | rs7009482   | 8  | 61195053  | G | A | 0.589 | -0.188 | 0.025 | 5.9E-14     | Emilsson |
| Plasma | CALCOCO2 | Q13137 | rs550510    | 17 | 46926615  | G | A | 0.843 | 0.190  | 0.033 | 0.00000001  | Emilsson |
| Plasma | CAPG     | P40121 | rs143448563 | 2  | 85610023  | A | G | 0.983 | 1.400  | 0.094 | 1E-48       | Emilsson |
| Plasma | CCL27    | Q9Y4X3 | rs2070074   | 9  | 34649442  | A | G | 0.907 | 0.321  | 0.041 | 1E-14       | Emilsson |
| Plasma | CCL4L1   | Q8NHW4 | rs2687507   | 17 | 34433964  | C | T | 0.747 | -0.239 | 0.029 | 1.5E-16     | Emilsson |
| Plasma | CD274    | Q9NZQ7 | rs1411262   | 9  | 5459419   | C | T | 0.736 | 0.310  | 0.027 | 1.7E-29     | Emilsson |
| Plasma | CD300A   | Q9UGN4 | rs2272111   | 17 | 72469966  | G | A | 0.788 | 0.435  | 0.028 | 1.2E-52     | Emilsson |
| Plasma | CD300E   | Q496F6 | rs8081669   | 17 | 72614611  | G | A | 0.551 | 0.270  | 0.025 | 4.2E-27     | Emilsson |
| Plasma | CD7      | P09564 | rs116473040 | 17 | 80291652  | A | G | 0.955 | 0.962  | 0.057 | 1.3E-61     | Emilsson |

|        |         |        |             |    |           |   |   |       |        |       |             |          |
|--------|---------|--------|-------------|----|-----------|---|---|-------|--------|-------|-------------|----------|
| Plasma | CD8A    | P01732 | rs111976570 | 2  | 87014112  | A | C | 0.810 | -0.567 | 0.031 | 7.3E-73     | Emilsson |
| Plasma | CDCP1   | Q9H5V8 | rs7621542   | 3  | 45206484  | C | T | 0.800 | 0.180  | 0.031 | 5.9E-09     | Emilsson |
| Plasma | CDH11   | P55287 | rs59614634  | 16 | 65029943  | A | T | 0.890 | 0.803  | 0.036 | 3.4E-101    | Emilsson |
| Plasma | CFHR1   | Q03591 | rs57809726  | 1  | 196841377 | A | G | 0.862 | 1.295  | 0.027 | 1E-200      | Emilsson |
| Plasma | CFHR4   | Q92496 | rs4915559   | 1  | 196886770 | T | C | 0.753 | 0.655  | 0.026 | 1.7E-131    | Emilsson |
| Plasma | CHST12  | Q9NRB3 | rs2969076   | 7  | 2473747   | A | G | 0.872 | -0.235 | 0.036 | 7.3E-11     | Emilsson |
| Plasma | CLEC11A | Q9Y240 | rs13866     | 19 | 51228746  | C | T | 0.691 | 0.154  | 0.026 | 0.000000004 | Emilsson |
| Plasma | CLEC1B  | Q9P126 | rs544605    | 12 | 10146707  | T | C | 0.781 | -0.504 | 0.028 | 4.8E-70     | Emilsson |
| Plasma | CLEC4C  | Q8WTT0 | rs11055602  | 12 | 7904111   | T | G | 0.567 | -0.950 | 0.019 | 1E-200      | Emilsson |
| Plasma | CLN5    | O75503 | rs7996555   | 13 | 77562492  | C | T | 0.946 | 0.350  | 0.055 | 1.5E-10     | Emilsson |
| Plasma | CNP     | P09543 | rs12602950  | 17 | 40123829  | A | G | 0.704 | 0.187  | 0.027 | 3.8E-12     | Emilsson |
| Plasma | CPQ     | Q9Y646 | rs145746079 | 8  | 97832518  | T | C | 0.972 | 1.192  | 0.073 | 7.1E-58     | Emilsson |
| Plasma | CRHBP   | P24387 | rs6414971   | 5  | 76170674  | T | A | 0.741 | -0.511 | 0.026 | 2.9E-79     | Emilsson |
| Plasma | CRLF1   | O75462 | rs2238647   | 19 | 18710535  | G | A | 0.778 | -0.286 | 0.029 | 1.4E-22     | Emilsson |
| Plasma | CROT    | Q9UKG9 | rs77463367  | 7  | 87006034  | C | G | 0.930 | 0.348  | 0.047 | 1.6E-13     | Emilsson |
| Plasma | CRTAC1  | Q9NQ79 | rs588061    | 10 | 99642731  | C | T | 0.529 | 0.346  | 0.024 | 8.6E-47     | Emilsson |
| Plasma | CRTAM   | O95727 | rs2370794   | 11 | 122714782 | A | G | 0.668 | -0.236 | 0.026 | 5.8E-20     | Emilsson |
| Plasma | CRYZ    | Q08257 | rs3819946   | 1  | 75175886  | T | C | 0.861 | -1.175 | 0.029 | 1E-200      | Emilsson |
| Plasma | CST4    | P01036 | rs7270028   | 20 | 23681073  | C | A | 0.896 | 0.465  | 0.039 | 1.8E-31     | Emilsson |
| Plasma | CTGF    | P29279 | rs9388953   | 6  | 132297509 | G | A | 0.789 | 0.353  | 0.030 | 8.7E-32     | Emilsson |
| Plasma | CTSC    | P53634 | rs55897509  | 11 | 88066714  | A | C | 0.918 | -0.926 | 0.041 | 2.3E-107    | Emilsson |



|        |        |        |             |    |           |   |   |       |        |       |             |          |
|--------|--------|--------|-------------|----|-----------|---|---|-------|--------|-------|-------------|----------|
| Plasma | CXCL10 | P02778 | rs4859589   | 4  | 76948299  | G | A | 0.505 | 0.133  | 0.024 | 0.00000005  | Emilsson |
| Plasma | CYB5D2 | Q8WUJ1 | rs77246175  | 17 | 4072761   | G | C | 0.921 | -0.342 | 0.046 | 2E-13       | Emilsson |
| Plasma | CYTL1  | Q9NRR1 | rs62291616  | 4  | 5052063   | T | C | 0.814 | -0.354 | 0.029 | 1.2E-32     | Emilsson |
| Plasma | DEFA1  | P59665 | rs4284061   | 8  | 6878257   | A | T | 0.431 | 0.171  | 0.024 | 3.3E-12     | Emilsson |
| Plasma | DKK 2  | Q9UBU2 | rs77571736  | 4  | 107864984 | G | C | 0.954 | 0.945  | 0.047 | 2.2E-83     | Emilsson |
| Plasma | DNER   | Q8NFT8 | rs35032874  | 2  | 230309360 | T | G | 0.741 | 0.162  | 0.029 | 0.000000017 | Emilsson |
| Plasma | DPEP1  | P16444 | rs423135    | 16 | 89740873  | G | A | 0.429 | -0.313 | 0.024 | 5.5E-39     | Emilsson |
| Plasma | DUT    | P33316 | rs117540572 | 15 | 48670241  | G | A | 0.939 | -0.339 | 0.050 | 2.1E-11     | Emilsson |
| Plasma | DYNLL2 | Q96FJ2 | rs35729384  | 17 | 56178900  | C | T | 0.698 | 0.161  | 0.025 | 2.9E-10     | Emilsson |
| Plasma | EBI3   | Q14213 | rs10409421  | 19 | 4254752   | A | G | 0.716 | 1.049  | 0.019 | 1E-200      | Emilsson |
| Plasma | ECH1   | Q13011 | rs4802890   | 19 | 39304402  | G | A | 0.920 | -0.533 | 0.044 | 2.2E-33     | Emilsson |
| Plasma | ENDOU  | P21128 | rs2072117   | 12 | 48131728  | G | A | 0.711 | -0.163 | 0.026 | 3.8E-10     | Emilsson |
| Plasma | EPHA2  | P29317 | rs28629977  | 1  | 16497272  | C | G | 0.564 | -0.148 | 0.023 | 2E-10       | Emilsson |
| Plasma | EPHB6  | O15197 | rs7789303   | 7  | 142552547 | A | G | 0.725 | 0.239  | 0.026 | 6.3E-20     | Emilsson |
| Plasma | F13B   | P05160 | rs12116643  | 1  | 196973183 | T | C | 0.863 | 0.547  | 0.033 | 1.2E-60     | Emilsson |
| Plasma | FBLN1  | P23142 | rs67136035  | 22 | 45813433  | T | D | 0.541 | 0.132  | 0.024 | 0.00000005  | Emilsson |
| Plasma | FCN3   | O75636 | rs2474283   | 1  | 27716213  | T | C | 0.933 | 0.716  | 0.048 | 1.1E-48     | Emilsson |
| Plasma | FGFBP3 | Q8TAT2 | rs11186737  | 10 | 93666349  | C | T | 0.746 | 0.302  | 0.027 | 5.9E-28     | Emilsson |
| Plasma | FGFR3  | P22607 | rs2403274   | 4  | 1754515   | C | G | 0.752 | 0.177  | 0.029 | 6.7E-10     | Emilsson |
| Plasma | FGL1   | Q08830 | rs7815429   | 8  | 17737357  | T | C | 0.313 | -0.446 | 0.025 | 3.3E-70     | Emilsson |
| Plasma | FKBP7  | Q9Y680 | rs10930831  | 2  | 179303976 | G | C | 0.768 | -0.365 | 0.027 | 2E-39       | Emilsson |

|        |          |        |             |    |           |   |   |       |        |       |             |          |
|--------|----------|--------|-------------|----|-----------|---|---|-------|--------|-------|-------------|----------|
| Plasma | FMOD     | Q06828 | rs4971253   | 1  | 203321414 | G | A | 0.921 | 0.250  | 0.045 | 0.000000027 | Emilsson |
| Plasma | FTCD     | O95954 | rs149024257 | 21 | 47686213  | G | A | 0.938 | -0.287 | 0.051 | 0.000000019 | Emilsson |
| Plasma | GAA      | P10253 | rs12450199  | 17 | 78076592  | A | C | 0.647 | 0.369  | 0.025 | 1.4E-48     | Emilsson |
| Plasma | GALNT16  | Q8N428 | rs12100668  | 14 | 69793475  | G | A | 0.408 | -0.194 | 0.025 | 4.4E-15     | Emilsson |
| Plasma | GDI2     | P50395 | rs2890364   | 10 | 5833748   | G | A | 0.774 | 0.219  | 0.029 | 9.1E-14     | Emilsson |
| Plasma | GKN2     | Q86XP6 | rs13008230  | 2  | 69154583  | T | G | 0.973 | 0.942  | 0.076 | 2.7E-34     | Emilsson |
| Plasma | GLO1     | Q04760 | rs12209477  | 6  | 38669799  | C | G | 0.660 | 0.168  | 0.026 | 7.1E-11     | Emilsson |
| Plasma | GNMT     | Q14749 | rs9471987   | 6  | 42944140  | A | G | 0.402 | 0.400  | 0.024 | 2.4E-61     | Emilsson |
| Plasma | GNPTG    | Q9UJJ9 | rs4984820   | 16 | 1407809   | C | T | 0.923 | -0.344 | 0.046 | 8E-14       | Emilsson |
| Plasma | GSN      | P06396 | rs76331566  | 9  | 124009014 | C | T | 0.969 | 0.398  | 0.068 | 0.000000005 | Emilsson |
| Plasma | GSTM3    | P21266 | rs115929572 | 1  | 110246053 | G | A | 0.935 | -0.249 | 0.032 | 3.4E-15     | Emilsson |
| Plasma | HDGF     | P51858 | rs4399146   | 1  | 156713558 | G | A | 0.717 | 0.269  | 0.027 | 3.2E-23     | Emilsson |
| Plasma | HIBCH    | Q6NVY1 | rs291447    | 2  | 191177005 | A | C | 0.393 | -0.631 | 0.023 | 2.9E-152    | Emilsson |
| Plasma | HPSE     | Q9Y251 | rs11732810  | 4  | 84230878  | G | T | 0.773 | 0.541  | 0.028 | 7.7E-78     | Emilsson |
| Plasma | HSD17B14 | Q9BPX1 | rs473464    | 19 | 49334248  | T | C | 0.498 | 0.145  | 0.026 | 0.000000027 | Emilsson |
| Plasma | IFNLR1   | Q8IU57 | rs12046369  | 1  | 24526135  | G | T | 0.853 | 0.244  | 0.035 | 3.3E-12     | Emilsson |
| Plasma | IGDCC4   | Q8TDY8 | rs8034057   | 15 | 65789430  | G | A | 0.905 | 0.344  | 0.042 | 3.5E-16     | Emilsson |
| Plasma | IGFBP5   | P24593 | rs139739387 | 2  | 217402489 | A | G | 0.984 | 0.608  | 0.098 | 7E-10       | Emilsson |
| Plasma | IL10RB   | Q08334 | rs2834167   | 21 | 34640788  | A | G | 0.732 | 0.160  | 0.028 | 0.000000011 | Emilsson |
| Plasma | IL1R1    | P14778 | rs7588201   | 2  | 102746276 | A | C | 0.722 | 0.163  | 0.026 | 2.6E-10     | Emilsson |
| Plasma | IL7      | P13232 | rs72666886  | 8  | 79728782  | C | T | 0.903 | 0.340  | 0.042 | 5.3E-16     | Emilsson |

|        |           |        |             |    |           |   |   |       |        |       |          |          |
|--------|-----------|--------|-------------|----|-----------|---|---|-------|--------|-------|----------|----------|
| Plasma | IMPAD1    | Q9NX62 | rs112433249 | 8  | 57876576  | T | C | 0.992 | 1.685  | 0.136 | 1.7E-34  | Emilsson |
| Plasma | INPP5B    | P32019 | rs61778082  | 1  | 38306356  | T | C | 0.865 | 0.547  | 0.034 | 2.1E-55  | Emilsson |
| Plasma | ITIH2     | P19823 | rs73621225  | 10 | 7740905   | T | A | 0.933 | -1.181 | 0.044 | 1.4E-142 | Emilsson |
| Plasma | JAM3      | Q9BX67 | rs655627    | 11 | 134021859 | A | G | 0.566 | 0.184  | 0.024 | 4.1E-14  | Emilsson |
| Plasma | KIAA1549L | Q6ZVL6 | rs12792396  | 11 | 33417110  | G | A | 0.381 | 0.439  | 0.025 | 7.1E-68  | Emilsson |
| Plasma | KIAA2013  | Q8IYS2 | rs11588551  | 1  | 11941936  | T | C | 0.418 | 0.178  | 0.025 | 2E-12    | Emilsson |
| Plasma | KLK10     | O43240 | rs2569454   | 19 | 51523203  | C | T | 0.641 | 0.405  | 0.026 | 4.5E-54  | Emilsson |
| Plasma | KLK13     | Q9UKR3 | rs3760739   | 19 | 51538561  | G | T | 0.659 | 0.388  | 0.025 | 3.9E-54  | Emilsson |
| Plasma | KLRB1     | Q12918 | rs3933456   | 12 | 9753788   | C | A | 0.625 | 0.213  | 0.026 | 2.1E-16  | Emilsson |
| Plasma | LAG3      | P18627 | rs3782735   | 12 | 6885076   | A | G | 0.607 | 0.154  | 0.025 | 4.3E-10  | Emilsson |
| Plasma | LANCL1    | O43813 | rs187097936 | 2  | 211362949 | C | G | 0.985 | 0.781  | 0.103 | 3.7E-14  | Emilsson |
| Plasma | LBP       | P18428 | rs73112473  | 20 | 37006729  | C | T | 0.922 | 1.009  | 0.043 | 2.4E-112 | Emilsson |
| Plasma | LEAP2     | Q969E1 | rs57880964  | 5  | 132210674 | G | C | 0.838 | -0.300 | 0.033 | 4.1E-19  | Emilsson |
| Plasma | LECT2     | O14960 | rs248160    | 5  | 135293512 | T | C | 0.670 | -0.312 | 0.026 | 3.7E-33  | Emilsson |
| Plasma | LGALS3BP  | Q08380 | rs4789847   | 17 | 77004644  | A | G | 0.829 | -0.196 | 0.033 | 3.9E-09  | Emilsson |
| Plasma | LGALS4    | P56470 | rs55945853  | 19 | 39230046  | G | A | 0.510 | 0.181  | 0.024 | 7.7E-14  | Emilsson |
| Plasma | LGALS9    | O00182 | rs62055780  | 17 | 25971795  | T | C | 0.753 | 0.203  | 0.030 | 7.9E-12  | Emilsson |
| Plasma | LGMN      | Q99538 | rs7140705   | 14 | 93224207  | T | G | 0.913 | -0.268 | 0.045 | 3.6E-09  | Emilsson |
| Plasma | LILRA3    | Q8N6C8 | rs398217    | 19 | 54793038  | A | G | 0.773 | 1.243  | 0.020 | 1E-200   | Emilsson |
| Plasma | LRP11     | Q86VZ4 | rs9371533   | 6  | 150210681 | A | G | 0.376 | 0.825  | 0.021 | 1E-200   | Emilsson |
| Plasma | LRP12     | Q9Y561 | rs72679151  | 8  | 105627117 | C | T | 0.796 | -0.211 | 0.030 | 2.6E-12  | Emilsson |

|        |         |        |             |    |           |   |   |       |        |       |             |          |
|--------|---------|--------|-------------|----|-----------|---|---|-------|--------|-------|-------------|----------|
| Plasma | LRP8    | Q14114 | rs10218811  | 1  | 53805882  | A | G | 0.725 | 0.166  | 0.027 | 9.8E-10     | Emilsson |
| Plasma | LRRRC4C | Q9HCJ2 | rs998447    | 11 | 40310789  | A | C | 0.538 | -0.137 | 0.024 | 0.000000022 | Emilsson |
| Plasma | LSAMP   | Q13449 | rs17646258  | 3  | 116038249 | C | T | 0.829 | 0.222  | 0.031 | 1.5E-12     | Emilsson |
| Plasma | LYVE1   | Q9Y5Y7 | rs114527818 | 11 | 10619041  | T | A | 0.951 | -0.369 | 0.055 | 3.3E-11     | Emilsson |
| Plasma | MAN1A2  | O60476 | rs1289863   | 1  | 117854689 | C | T | 0.692 | 0.210  | 0.026 | 1.5E-15     | Emilsson |
| Plasma | MAN1C1  | Q9NR34 | rs3767879   | 1  | 26070909  | C | T | 0.465 | 0.172  | 0.023 | 9.3E-14     | Emilsson |
| Plasma | MANF    | P55145 | rs1552074   | 3  | 51408051  | T | C | 0.859 | 0.391  | 0.035 | 2.6E-28     | Emilsson |
| Plasma | MENT    | Q9BUN1 | rs12759273  | 1  | 151045024 | C | A | 0.988 | 0.669  | 0.116 | 8.6E-09     | Emilsson |
| Plasma | METTL24 | Q5JXM2 | rs12189608  | 6  | 110573292 | A | T | 0.956 | 0.378  | 0.061 | 7.4E-10     | Emilsson |
| Plasma | NCAM2   | O15394 | rs2826851   | 21 | 22835946  | A | G | 0.733 | -0.370 | 0.027 | 1.7E-42     | Emilsson |
| Plasma | NCR1    | O76036 | rs143981324 | 19 | 55419632  | T | C | 0.904 | 0.362  | 0.042 | 1.3E-17     | Emilsson |
| Plasma | NEGR1   | Q7Z3B1 | rs2220253   | 1  | 72565460  | T | C | 0.545 | 0.148  | 0.024 | 1.2E-09     | Emilsson |
| Plasma | NLGN2   | Q8NFZ4 | rs150452493 | 17 | 7303808   | C | T | 0.900 | 0.252  | 0.040 | 4.9E-10     | Emilsson |
| Plasma | NMB     | P08949 | rs12912342  | 15 | 85248216  | T | C | 0.661 | 0.164  | 0.025 | 7.6E-11     | Emilsson |
| Plasma | NPNT    | Q6UXI9 | rs78213340  | 4  | 106819613 | T | C | 0.930 | 0.314  | 0.049 | 1.7E-10     | Emilsson |
| Plasma | NPTXR   | O95502 | rs12628473  | 22 | 39240717  | A | G | 0.987 | -1.013 | 0.107 | 4.6E-21     | Emilsson |
| Plasma | NQO2    | P16083 | rs138616686 | 6  | 3003970   | A | G | 0.626 | 0.435  | 0.025 | 3.8E-64     | Emilsson |
| Plasma | NTM     | Q9P121 | rs2511504   | 11 | 131196396 | T | C | 0.588 | -0.381 | 0.023 | 1.7E-58     | Emilsson |
| Plasma | NTRK3   | Q16288 | rs9944243   | 15 | 88514162  | T | G | 0.879 | -0.221 | 0.035 | 5.2E-10     | Emilsson |
| Plasma | OLFM1   | Q99784 | rs11103667  | 9  | 137978360 | C | T | 0.815 | -0.193 | 0.032 | 2.6E-09     | Emilsson |
| Plasma | OLFM2   | O95897 | rs56243392  | 19 | 10061960  | A | T | 0.651 | -0.673 | 0.024 | 6E-157      | Emilsson |

|        |          |        |             |    |           |   |   |       |        |       |             |          |
|--------|----------|--------|-------------|----|-----------|---|---|-------|--------|-------|-------------|----------|
| Plasma | OSCAR    | Q8IYS5 | rs4442925   | 19 | 54554950  | T | C | 0.455 | 0.138  | 0.024 | 0.000000013 | Emilsson |
| Plasma | OXT      | P01178 | rs877172    | 20 | 3049890   | T | G | 0.660 | -0.669 | 0.024 | 5.6E-156    | Emilsson |
| Plasma | PCBD1    | P61457 | rs72818110  | 10 | 72614896  | A | C | 0.951 | 0.374  | 0.057 | 7.6E-11     | Emilsson |
| Plasma | PCDH9    | Q9HC56 | rs1927820   | 13 | 67774646  | G | C | 0.846 | -0.266 | 0.033 | 2.2E-15     | Emilsson |
| Plasma | PCSK9    | Q8NBP7 | rs191448950 | 1  | 55584844  | G | A | 0.989 | 1.069  | 0.113 | 8.4E-21     | Emilsson |
| Plasma | PCYOX1   | Q9UHG3 | rs2706762   | 2  | 70488470  | C | T | 0.860 | 0.790  | 0.032 | 1.4E-121    | Emilsson |
| Plasma | PDIA3    | P30101 | rs3110081   | 15 | 43995786  | C | T | 0.821 | 0.194  | 0.032 | 1.5E-09     | Emilsson |
| Plasma | PDLIM4   | P50479 | rs6864922   | 5  | 131616290 | C | T | 0.937 | 0.676  | 0.048 | 1.5E-44     | Emilsson |
| Plasma | PEBP1    | P30086 | rs76597567  | 12 | 118584885 | A | G | 0.982 | 1.971  | 0.085 | 4E-111      | Emilsson |
| Plasma | PGLYRP2  | Q96PD5 | rs55866012  | 19 | 15578008  | T | G | 0.842 | 0.486  | 0.033 | 1.8E-47     | Emilsson |
| Plasma | PIP      | P12273 | rs4726600   | 7  | 142881540 | G | A | 0.741 | -0.188 | 0.027 | 7.8E-12     | Emilsson |
| Plasma | PKDCC    | Q504Y2 | rs893812    | 2  | 42303114  | C | T | 0.731 | -0.236 | 0.027 | 5.6E-18     | Emilsson |
| Plasma | PLAT     | P00750 | rs77346091  | 8  | 42020158  | T | C | 0.973 | 0.549  | 0.077 | 1.2E-12     | Emilsson |
| Plasma | PLAUR    | Q03405 | rs2302524   | 19 | 44156472  | T | C | 0.820 | 0.220  | 0.031 | 7.9E-13     | Emilsson |
| Plasma | PLXNA1   | Q9UIW2 | rs891762    | 3  | 126739012 | G | T | 0.318 | -0.182 | 0.027 | 9.6E-12     | Emilsson |
| Plasma | PNLIPRP2 | P54317 | rs7910135   | 10 | 118398046 | C | A | 0.493 | -0.969 | 0.018 | 1E-200      | Emilsson |
| Plasma | POSTN    | Q15063 | rs962462    | 13 | 38089171  | A | G | 0.714 | 0.244  | 0.025 | 8.6E-23     | Emilsson |
| Plasma | PRDX6    | P30041 | rs6671141   | 1  | 173446934 | T | G | 0.850 | -0.413 | 0.034 | 8.8E-33     | Emilsson |
| Plasma | PREP     | P48147 | rs1051484   | 6  | 105726036 | C | T | 0.835 | -0.453 | 0.032 | 7E-44       | Emilsson |
| Plasma | PROK2    | Q9HC23 | rs7644362   | 3  | 71829242  | A | G | 0.798 | -1.001 | 0.025 | 1E-200      | Emilsson |
| Plasma | PRSS57   | Q6UWY2 | rs9304936   | 19 | 689590    | G | C | 0.715 | 0.599  | 0.026 | 7.5E-107    | Emilsson |

|        |           |        |             |    |           |   |   |       |        |       |             |          |
|--------|-----------|--------|-------------|----|-----------|---|---|-------|--------|-------|-------------|----------|
| Plasma | PSAP      | P07602 | rs7086891   | 10 | 73655350  | G | A | 0.709 | 0.619  | 0.025 | 3.6E-122    | Emilsson |
| Plasma | PSMB1     | P20618 | rs756519    | 6  | 170850862 | G | A | 0.531 | 0.412  | 0.023 | 8.1E-67     | Emilsson |
| Plasma | PTGR1     | Q14914 | rs112140014 | 9  | 114325849 | G | C | 0.952 | -0.726 | 0.055 | 2.1E-38     | Emilsson |
| Plasma | PTPRU     | Q92729 | rs2179795   | 1  | 29642318  | G | T | 0.725 | 0.154  | 0.028 | 0.000000038 | Emilsson |
| Plasma | PXDN      | Q92626 | rs34008669  | 2  | 1709779   | G | A | 0.502 | 0.158  | 0.023 | 1.8E-11     | Emilsson |
| Plasma | PYY       | P10082 | rs8074783   | 17 | 42028989  | C | A | 0.641 | 0.157  | 0.026 | 1.2E-09     | Emilsson |
| Plasma | PZP       | P20742 | rs7311982   | 12 | 9314857   | C | T | 0.698 | 0.500  | 0.019 | 2.7E-135    | Emilsson |
| Plasma | QPCT      | Q16769 | rs13027919  | 2  | 37567636  | C | T | 0.538 | 0.271  | 0.024 | 3.5E-28     | Emilsson |
| Plasma | RAB6B     | Q9NRW1 | rs9813363   | 3  | 133604743 | G | A | 0.825 | 0.278  | 0.032 | 1.2E-17     | Emilsson |
| Plasma | RBP4      | P02753 | rs36014035  | 10 | 95360027  | A | C | 0.643 | 0.147  | 0.025 | 7.2E-09     | Emilsson |
| Plasma | RECQL     | P46063 | rs144436375 | 12 | 21515500  | A | C | 0.980 | -0.935 | 0.086 | 9E-27       | Emilsson |
| Plasma | REG3G     | Q6UW15 | rs429694    | 2  | 79244586  | A | C | 0.794 | -0.487 | 0.028 | 9.5E-63     | Emilsson |
| Plasma | RNASE3    | P12724 | rs2771316   | 14 | 21430474  | C | T | 0.723 | 0.214  | 0.028 | 1.2E-14     | Emilsson |
| Plasma | RNPEP     | Q9H4A4 | rs59698324  | 1  | 201965855 | C | T | 0.725 | 0.371  | 0.027 | 3.8E-42     | Emilsson |
| Plasma | RSPO4     | Q2I0M5 | rs6056847   | 20 | 1028346   | G | A | 0.575 | -0.172 | 0.023 | 9E-14       | Emilsson |
| Plasma | S100A7    | P31151 | rs3014860   | 1  | 153314782 | A | G | 0.948 | -1.208 | 0.051 | 1.8E-114    | Emilsson |
| Plasma | SCUBE1    | Q8IWY4 | rs2744874   | 22 | 43715862  | T | C | 0.866 | -0.270 | 0.036 | 3.8E-14     | Emilsson |
| Plasma | SELPLG    | Q14242 | rs73191242  | 12 | 109013956 | G | A | 0.795 | 0.209  | 0.030 | 2.1E-12     | Emilsson |
| Plasma | SEMA4C    | Q9C0C4 | rs112826173 | 2  | 97489654  | A | G | 0.981 | 0.713  | 0.090 | 4E-15       | Emilsson |
| Plasma | SEMA4D    | Q92854 | rs45464494  | 9  | 91994433  | C | T | 0.929 | 1.278  | 0.041 | 1.5E-187    | Emilsson |
| Plasma | SERPINA11 | Q86U17 | rs17090881  | 14 | 94913209  | C | A | 0.835 | 0.288  | 0.031 | 1.8E-20     | Emilsson |

|        |                |        |             |    |           |   |   |       |        |       |             |          |
|--------|----------------|--------|-------------|----|-----------|---|---|-------|--------|-------|-------------|----------|
| Plasma | SFRP4          | Q6FHJ7 | rs75474297  | 7  | 37973124  | T | A | 0.855 | -0.302 | 0.034 | 2.1E-18     | Emilsson |
| Plasma | SFTPB          | P07988 | rs1130866   | 2  | 85893741  | A | G | 0.466 | -0.686 | 0.022 | 3.5E-189    | Emilsson |
| Plasma | SHANK3         | Q9BYB0 | rs6010042   | 22 | 51098764  | G | A | 0.748 | -0.327 | 0.027 | 6.6E-33     | Emilsson |
| Plasma | SHBG           | P04278 | rs858519    | 17 | 7531965   | T | C | 0.474 | -0.214 | 0.024 | 2.3E-18     | Emilsson |
| Plasma | SHMT1          | P34896 | rs8067462   | 17 | 18263571  | C | A | 0.607 | -0.300 | 0.025 | 1E-31       | Emilsson |
| Plasma | SLITRK3        | O94933 | rs62282371  | 3  | 164911694 | T | G | 0.887 | 0.345  | 0.038 | 3.7E-19     | Emilsson |
| Plasma | SMPD1          | P17405 | rs1050239   | 11 | 6415463   | G | A | 0.715 | 0.310  | 0.026 | 1.8E-31     | Emilsson |
| Plasma | SOD3           | P08294 | rs2695234   | 4  | 24804238  | G | A | 0.919 | -0.736 | 0.042 | 1.1E-64     | Emilsson |
| Plasma | SPINK1         | P00995 | rs4705205   | 5  | 147218813 | T | C | 0.573 | -0.212 | 0.025 | 1.5E-17     | Emilsson |
| Plasma | SPINK5         | Q9NQ38 | rs2052536   | 5  | 147504557 | T | G | 0.349 | -0.152 | 0.026 | 3.3E-09     | Emilsson |
| Plasma | SPON2          | Q9BUD6 | rs878323    | 4  | 1169813   | T | G | 0.687 | -0.213 | 0.026 | 1.8E-16     | Emilsson |
| Plasma | SRL            | Q86TD4 | rs8046884   | 16 | 4269558   | C | G | 0.495 | 0.150  | 0.024 | 6.3E-10     | Emilsson |
| Plasma | ST6GALNA<br>C6 | Q969X2 | rs183995738 | 9  | 130542640 | C | A | 0.987 | -0.715 | 0.107 | 3.1E-11     | Emilsson |
| Plasma | SULT2A1        | Q06520 | rs296369    | 19 | 48371853  | C | T | 0.843 | 0.360  | 0.033 | 1.7E-27     | Emilsson |
| Plasma | TF             | P02787 | rs4854760   | 3  | 133498741 | A | G | 0.735 | -0.227 | 0.028 | 6.1E-16     | Emilsson |
| Plasma | TGFB1          | P01137 | rs1800470   | 19 | 41858921  | A | G | 0.621 | 0.259  | 0.024 | 4.5E-26     | Emilsson |
| Plasma | THBS4          | P35443 | rs35351529  | 5  | 79390222  | T | C | 0.923 | -0.298 | 0.044 | 2.3E-11     | Emilsson |
| Plasma | TIMP2          | P16035 | rs2376999   | 17 | 76890864  | A | G | 0.884 | 0.418  | 0.037 | 3.3E-29     | Emilsson |
| Plasma | TMEM106B       | Q9NUM4 | rs10950398  | 7  | 12264871  | A | G | 0.393 | -0.272 | 0.025 | 6.1E-27     | Emilsson |
| Plasma | TMEM132D       | Q14C87 | rs61943549  | 12 | 130092229 | T | C | 0.948 | -0.486 | 0.055 | 1E-18       | Emilsson |
| Plasma | TNFRSF10B      | O14763 | rs4871844   | 8  | 22879734  | T | C | 0.658 | -0.143 | 0.026 | 0.000000043 | Emilsson |

|               |          |        |             |    |           |   |   |       |        |       |             |          |
|---------------|----------|--------|-------------|----|-----------|---|---|-------|--------|-------|-------------|----------|
| <b>Plasma</b> | TNFRSF19 | Q9NS68 | rs3814787   | 13 | 24152370  | G | C | 0.714 | -0.166 | 0.026 | 2.1E-10     | Emilsson |
| <b>Plasma</b> | TREM1    | Q9NP99 | rs3789204   | 6  | 41254741  | G | T | 0.693 | -0.374 | 0.024 | 1.4E-54     | Emilsson |
| <b>Plasma</b> | TREM2    | Q9NZC2 | rs114812713 | 6  | 41034000  | G | C | 0.955 | 0.360  | 0.057 | 3.1E-10     | Emilsson |
| <b>Plasma</b> | TREML1   | Q86YW5 | rs62396317  | 6  | 41095817  | A | G | 0.878 | 0.211  | 0.038 | 0.000000029 | Emilsson |
| <b>Plasma</b> | TXNDC15  | Q96J42 | rs78165052  | 5  | 134250596 | C | T | 0.875 | -0.307 | 0.036 | 3.6E-17     | Emilsson |
| <b>Plasma</b> | TYMP     | P19971 | rs131798    | 22 | 50971509  | G | T | 0.773 | 0.204  | 0.030 | 1.8E-11     | Emilsson |
| <b>Plasma</b> | TYRO3    | Q06418 | rs2289743   | 15 | 41860698  | C | G | 0.691 | -0.161 | 0.027 | 2.1E-09     | Emilsson |
| <b>Plasma</b> | UBASH3B  | Q8TF42 | rs10502249  | 11 | 122504251 | G | T | 0.712 | 0.187  | 0.027 | 1.1E-11     | Emilsson |
| <b>Plasma</b> | UGT1A6   | P19224 | rs111741722 | 2  | 234665983 | A | G | 0.681 | 0.265  | 0.027 | 1.8E-22     | Emilsson |
| <b>Plasma</b> | ULBP3    | Q9BZM4 | rs17054300  | 6  | 150370552 | G | A | 0.762 | 0.171  | 0.028 | 1.7E-09     | Emilsson |
| <b>Plasma</b> | UNC5D    | Q6UXZ4 | rs6468316   | 8  | 35237788  | T | C | 0.417 | 0.141  | 0.024 | 9.5E-09     | Emilsson |
| <b>Plasma</b> | UST      | Q9Y2C2 | rs11155591  | 6  | 149064986 | C | T | 0.685 | 0.149  | 0.026 | 0.000000012 | Emilsson |
| <b>Plasma</b> | UXS1     | Q8NBZ7 | rs12617748  | 2  | 106836042 | G | A | 0.870 | -0.219 | 0.036 | 1.7E-09     | Emilsson |
| <b>Plasma</b> | VAV1     | P15498 | rs56100731  | 19 | 6857245   | C | T | 0.930 | 0.363  | 0.048 | 5.6E-14     | Emilsson |
| <b>Plasma</b> | VWA2     | Q5GFL6 | rs11595697  | 10 | 115905775 | C | T | 0.903 | -0.431 | 0.042 | 7.8E-25     | Emilsson |
| <b>Plasma</b> | VWC2     | Q2TAL6 | rs79259707  | 7  | 49812564  | C | A | 0.868 | 0.340  | 0.035 | 1.3E-22     | Emilsson |
| <b>Plasma</b> | WARS     | P23381 | rs941923    | 14 | 100813077 | C | T | 0.766 | 0.255  | 0.029 | 6.6E-18     | Emilsson |
| <b>Plasma</b> | WFDC1    | Q9HC57 | rs400345    | 16 | 84328494  | C | T | 0.791 | 0.451  | 0.029 | 5.5E-54     | Emilsson |
| <b>Plasma</b> | WFDC5    | Q8TCV5 | rs35017113  | 20 | 43692684  | C | T | 0.843 | 0.229  | 0.033 | 4.7E-12     | Emilsson |
| <b>Plasma</b> | WFIKKN1  | Q96NZ8 | rs11248941  | 16 | 658271    | G | T | 0.732 | -0.203 | 0.028 | 2.3E-13     | Emilsson |
| <b>Plasma</b> | WISP2    | O76076 | rs1061098   | 20 | 43356156  | C | T | 0.663 | 0.213  | 0.022 | 4.8E-21     | Emilsson |



|               |                                    |        |             |    |           |   |   |       |        |       |             |          |
|---------------|------------------------------------|--------|-------------|----|-----------|---|---|-------|--------|-------|-------------|----------|
| <b>Plasma</b> | XXYLT1                             | Q8NBI6 | rs55947051  | 3  | 194783033 | T | C | 0.841 | -0.248 | 0.033 | 8.6E-14     | Emilsson |
| <b>Plasma</b> | ZG16B                              | Q96DA0 | rs2190809   | 16 | 2880614   | C | T | 0.725 | 0.156  | 0.027 | 0.000000015 | Emilsson |
| <b>CSF</b>    | 6-Phosphogluc onate dehydrogena se | P52209 | rs141107515 | 1  | 10461933  | G | A | 0.977 | -0.185 | 0.020 | 9.82213E-20 | Yang     |
| <b>CSF</b>    | AK1A1                              | P14550 | rs2229540   | 1  | 46032311  | G | A | 0.046 | -0.191 | 0.012 | 6.12071E-57 | Yang     |
| <b>CSF</b>    | Apo E2                             | P02649 | rs71352238  | 19 | 45394336  | G | A | 0.191 | 0.023  | 0.004 | 6.67415E-09 | Yang     |
| <b>CSF</b>    | Apo L1                             | O14791 | rs10854688  | 22 | 36653854  | T | C | 0.699 | -0.059 | 0.011 | 2.02783E-08 | Yang     |
| <b>CSF</b>    | ARMEL                              | Q49AH0 | rs72772417  | 10 | 14873794  | T | C | 0.044 | 0.088  | 0.010 | 2.06173E-17 | Yang     |
| <b>CSF</b>    | ART                                | O00253 | rs9928014   | 16 | 67991427  | T | C | 0.939 | 0.084  | 0.014 | 6.18128E-10 | Yang     |
| <b>CSF</b>    | ARTS1                              | Q9NZ08 | rs17482078  | 5  | 96118866  | T | C | 0.189 | -0.246 | 0.012 | 8.64477E-95 | Yang     |
| <b>CSF</b>    | Arylsulfatase A                    | P15289 | rs6151419   | 22 | 51064915  | G | A | 0.840 | -0.067 | 0.007 | 3.93584E-20 | Yang     |
| <b>CSF</b>    | ASAH2                              | Q9NR71 | rs2813302   | 10 | 52012044  | G | A | 0.267 | -0.060 | 0.006 | 5.46766E-24 | Yang     |
| <b>CSF</b>    | AS AHL                             | Q02083 | rs66498356  | 4  | 76857064  | G | C | 0.719 | -0.134 | 0.007 | 2.1747E-72  | Yang     |
| <b>CSF</b>    | ATS 13                             | Q76LX8 | rs34265876  | 9  | 136287207 | G | A | 0.080 | -0.081 | 0.012 | 3.98158E-11 | Yang     |
| <b>CSF</b>    | B7-H1                              | Q9NZQ7 | rs7048841   | 9  | 5460801   | T | C | 0.472 | 0.048  | 0.004 | 1.77584E-26 | Yang     |
| <b>CSF</b>    | B7-H2                              | O75144 | rs56124762  | 21 | 45658474  | G | A | 0.238 | -0.103 | 0.006 | 1.67221E-59 | Yang     |
| <b>CSF</b>    | BSP                                | P21815 | rs6855426   | 4  | 88646335  | G | A | 0.720 | 0.136  | 0.024 | 1.21624E-08 | Yang     |
| <b>CSF</b>    | BST1                               | Q10588 | rs7683000   | 4  | 15647074  | G | A | 0.162 | -0.179 | 0.009 | 3.33719E-81 | Yang     |
| <b>CSF</b>    | C1-Esterase Inhibitor              | P05155 | rs11603020  | 11 | 57374332  | G | A | 0.259 | -0.055 | 0.006 | 1.55823E-21 | Yang     |
| <b>CSF</b>    | CAPG                               | P40121 | rs3770102   | 2  | 85637837  | A | C | 0.394 | 0.033  | 0.005 | 9.54331E-11 | Yang     |

|            |                               |        |            |    |           |   |   |       |        |       |             |      |
|------------|-------------------------------|--------|------------|----|-----------|---|---|-------|--------|-------|-------------|------|
| <b>CSF</b> | Carbonic Anhydrase IV         | P22748 | rs62083731 | 17 | 58262406  | T | C | 0.961 | -0.103 | 0.014 | 3.75156E-13 | Yang |
| <b>CSF</b> | CATF                          | Q9UBX1 | rs572846   | 11 | 66331458  | G | A | 0.564 | -0.025 | 0.005 | 4.71065E-08 | Yang |
| <b>CSF</b> | Cathepsin B                   | P07858 | rs1736065  | 8  | 11685453  | G | A | 0.251 | 0.055  | 0.005 | 2.66173E-26 | Yang |
| <b>CSF</b> | Cathepsin H                   | P09668 | rs2869887  | 15 | 79155033  | A | C | 0.236 | -0.074 | 0.008 | 1.53308E-18 | Yang |
| <b>CSF</b> | Cathepsin S                   | P25774 | rs41271951 | 1  | 150737220 | G | A | 0.071 | -0.125 | 0.009 | 1.00134E-45 | Yang |
| <b>CSF</b> | CBPE                          | P16870 | rs11736871 | 4  | 166336382 | T | C | 0.690 | 0.028  | 0.005 | 3.36615E-10 | Yang |
| <b>CSF</b> | CD30 Ligand                   | P32971 | rs3181370  | 9  | 117665752 | G | A | 0.400 | -0.030 | 0.004 | 3.81563E-12 | Yang |
| <b>CSF</b> | CD5L                          | O43866 | rs6427401  | 1  | 157748564 | G | A | 0.496 | 0.059  | 0.011 | 1.79071E-08 | Yang |
| <b>CSF</b> | CDON                          | Q4KMG0 | rs76617496 | 11 | 125870397 | G | A | 0.037 | 0.136  | 0.012 | 4.63026E-28 | Yang |
| <b>CSF</b> | Chitotriosidase-1             | Q13231 | rs2244385  | 1  | 203191262 | G | C | 0.177 | -0.282 | 0.023 | 2.91887E-34 | Yang |
| <b>CSF</b> | CLC7A                         | Q9BXN2 | rs16909966 | 12 | 10224430  | C | A | 0.074 | -0.118 | 0.009 | 4.46303E-39 | Yang |
| <b>CSF</b> | CNTN2                         | Q02246 | rs2242001  | 1  | 205031744 | G | A | 0.842 | -0.088 | 0.006 | 1.29802E-47 | Yang |
| <b>CSF</b> | Coagulation Factor V          | P12259 | rs966751   | 1  | 169486141 | G | C | 0.050 | -0.106 | 0.012 | 1.28811E-18 | Yang |
| <b>CSF</b> | Coagulation Factor VII        | P08709 | rs488703   | 13 | 113770876 | G | A | 0.877 | -0.165 | 0.011 | 7.34078E-53 | Yang |
| <b>CSF</b> | Collectin Kidney 1            | Q9BWP8 | rs10206003 | 2  | 3672670   | G | A | 0.122 | 0.205  | 0.014 | 2.85473E-48 | Yang |
| <b>CSF</b> | complement factor H-related 5 | Q9BXR6 | rs35662416 | 1  | 196967354 | G | A | 0.978 | -0.163 | 0.023 | 8.709E-13   | Yang |
| <b>CSF</b> | CREL1                         | Q96HD1 | rs58020561 | 3  | 10054682  | G | A | 0.283 | -0.058 | 0.007 | 1.26873E-17 | Yang |
| <b>CSF</b> | Cripto                        | P13385 | rs11713041 | 3  | 46770034  | T | C | 0.941 | 0.176  | 0.022 | 4.75168E-16 | Yang |
| <b>CSF</b> | Cyclophilin F                 | P30405 | rs11002931 | 10 | 81094251  | C | A | 0.265 | -0.034 | 0.004 | 1.03476E-17 | Yang |
| <b>CSF</b> | Cystatin M                    | Q15828 | rs610497   | 11 | 65765551  | G | A | 0.230 | 0.132  | 0.007 | 3.31356E-76 | Yang |
| <b>CSF</b> | DC-SIGN                       | Q9NNX6 | rs1010047  | 19 | 7793502   | G | A | 0.542 | -0.034 | 0.005 | 2.0753E-10  | Yang |

|            |                                    |        |            |    |           |   |   |       |        |       |             |      |
|------------|------------------------------------|--------|------------|----|-----------|---|---|-------|--------|-------|-------------|------|
| <b>CSF</b> | DERM                               | Q07507 | rs545833   | 1  | 168689940 | T | C | 0.270 | 0.065  | 0.006 | 9.1418E-25  | Yang |
| <b>CSF</b> | DLL1                               | O00548 | rs9348260  | 6  | 170516123 | G | A | 0.315 | 0.028  | 0.005 | 2.7945E-08  | Yang |
| <b>CSF</b> | DPP2                               | Q9UHL4 | rs6420280  | 9  | 140002501 | T | C | 0.219 | -0.057 | 0.004 | 2.27412E-48 | Yang |
| <b>CSF</b> | ECM1                               | Q16610 | rs7002     | 1  | 150445819 | G | A | 0.369 | -0.023 | 0.004 | 3.53042E-11 | Yang |
| <b>CSF</b> | EGF                                | P01133 | rs10488881 | 4  | 110877416 | T | A | 0.330 | 0.035  | 0.006 | 1.5343E-08  | Yang |
| <b>CSF</b> | EMR2                               | Q9UHX3 | rs11880837 | 19 | 14808453  | G | A | 0.705 | 0.054  | 0.005 | 1.6266E-25  | Yang |
| <b>CSF</b> | Endocan                            | Q9NQ30 | rs4865911  | 5  | 54324920  | G | A | 0.387 | 0.035  | 0.006 | 7.17211E-10 | Yang |
| <b>CSF</b> | EphA1                              | P21709 | rs7792781  | 7  | 143107026 | T | C | 0.072 | -0.126 | 0.009 | 1.79201E-42 | Yang |
| <b>CSF</b> | ERBB1                              | P00533 | rs6957408  | 7  | 54923277  | T | C | 0.160 | -0.040 | 0.007 | 2.17726E-09 | Yang |
| <b>CSF</b> | Esterase D                         | P10768 | rs8192887  | 13 | 47362478  | T | C | 0.097 | -0.204 | 0.012 | 7.58325E-63 | Yang |
| <b>CSF</b> | FAM3B                              | P58499 | rs2838014  | 21 | 42697714  | G | C | 0.192 | 0.246  | 0.009 | 1.0179E-159 | Yang |
| <b>CSF</b> | FAM3D                              | Q96BQ1 | rs4020782  | 3  | 58648031  | T | C | 0.120 | -0.076 | 0.011 | 3.08024E-12 | Yang |
| <b>CSF</b> | Fas, soluble                       | P25445 | rs4406737  | 10 | 90759724  | G | A | 0.537 | 0.060  | 0.005 | 4.1082E-36  | Yang |
| <b>CSF</b> | FCG2B                              | P31994 | rs4657041  | 1  | 161478859 | T | C | 0.496 | 0.327  | 0.012 | 8.3853E-167 | Yang |
| <b>CSF</b> | FGF-19                             | O95750 | rs4980680  | 11 | 69523592  | G | A | 0.850 | -0.085 | 0.009 | 4.37845E-22 | Yang |
| <b>CSF</b> | FGF-19                             | O95750 | rs7480286  | 11 | 69664318  | T | A | 0.644 | 0.037  | 0.007 | 3.15365E-08 | Yang |
| <b>CSF</b> | FSTL3                              | O95633 | rs2301742  | 19 | 675513    | C | A | 0.446 | -0.026 | 0.004 | 2.36203E-11 | Yang |
| <b>CSF</b> | FUT5                               | Q11128 | rs78114888 | 19 | 5947688   | G | A | 0.845 | 0.127  | 0.008 | 1.20101E-54 | Yang |
| <b>CSF</b> | Galectin-3                         | P17931 | rs76426991 | 14 | 55600939  | G | A | 0.919 | -0.088 | 0.007 | 2.67696E-41 | Yang |
| <b>CSF</b> | Galectin-8                         | O00214 | rs16833818 | 1  | 236701459 | G | C | 0.672 | -0.033 | 0.004 | 2.93884E-19 | Yang |
| <b>CSF</b> | Gelsolin                           | P06396 | rs76098787 | 9  | 124047836 | T | C | 0.961 | 0.057  | 0.008 | 3.05423E-12 | Yang |
| <b>CSF</b> | Glutathione<br>S-transferase<br>Pi | P09211 | rs4891     | 11 | 67353970  | G | A | 0.352 | -0.101 | 0.006 | 4.44227E-68 | Yang |

|     |                         |        |            |    |           |   |   |       |        |       |             |      |
|-----|-------------------------|--------|------------|----|-----------|---|---|-------|--------|-------|-------------|------|
| CSF | GPC5                    | P78333 | rs9523318  | 13 | 92035073  | G | A | 0.600 | 0.036  | 0.005 | 3.09009E-11 | Yang |
| CSF | GPC5                    | P78333 | rs4331227  | 13 | 92485166  | T | C | 0.643 | 0.031  | 0.006 | 1.83195E-08 | Yang |
| CSF | GPNMB                   | Q14956 | rs858274   | 7  | 23294668  | T | C | 0.544 | -0.114 | 0.006 | 1.10666E-81 | Yang |
| CSF | GPVI                    | Q9HCN6 | rs1613662  | 19 | 55536595  | G | A | 0.173 | -0.096 | 0.009 | 4.58798E-26 | Yang |
| CSF | Granulysin              | P22749 | rs12151621 | 2  | 85934499  | C | A | 0.760 | 0.212  | 0.014 | 1.59359E-48 | Yang |
| CSF | Growth hormone receptor | P10912 | rs58934290 | 5  | 42640886  | G | A | 0.269 | 0.045  | 0.007 | 2.09223E-10 | Yang |
| CSF | Haptoglobin, Mixed Type | P00738 | rs77303550 | 16 | 72079657  | T | C | 0.193 | 0.712  | 0.067 | 1.59833E-26 | Yang |
| CSF | HCC-4                   | O15467 | rs74842203 | 17 | 34304680  | T | C | 0.022 | -0.216 | 0.033 | 4.75642E-11 | Yang |
| CSF | Heparin cofactor II     | P05546 | rs165818   | 22 | 21122412  | T | C | 0.415 | 0.035  | 0.005 | 5.30848E-12 | Yang |
| CSF | HGF                     | P14210 | rs10248271 | 7  | 81417306  | T | G | 0.770 | -0.043 | 0.006 | 2.07507E-13 | Yang |
| CSF | HGFA                    | Q04756 | rs1203107  | 4  | 3459849   | T | C | 0.105 | -0.232 | 0.017 | 1.57507E-44 | Yang |
| CSF | HPLN1                   | P10915 | rs4274957  | 5  | 83207463  | G | A | 0.324 | 0.194  | 0.008 | 2.5164E-121 | Yang |
| CSF | IDUA                    | P35475 | rs35220088 | 4  | 1010251   | G | C | 0.635 | 0.071  | 0.005 | 3.41122E-41 | Yang |
| CSF | IFN-a/b R1              | P17181 | rs12483293 | 21 | 34716789  | C | A | 0.272 | 0.024  | 0.004 | 2.84952E-08 | Yang |
| CSF | IGF-II receptor         | P11717 | rs628031   | 6  | 160560845 | G | A | 0.625 | -0.035 | 0.004 | 1.68143E-16 | Yang |
| CSF | IL-1 R AcP              | Q9NPH3 | rs9813227  | 3  | 190340177 | C | A | 0.848 | 0.162  | 0.009 | 2.20016E-75 | Yang |
| CSF | IL-1 R4                 | Q01638 | rs10178436 | 2  | 102926511 | G | A | 0.464 | 0.311  | 0.011 | 1.7054E-190 | Yang |
| CSF | IL-1 sRI                | P14778 | rs6722640  | 2  | 102661613 | T | A | 0.421 | 0.036  | 0.004 | 3.2193E-19  | Yang |
| CSF | IL-1 sRII               | P27930 | rs7561460  | 2  | 102617204 | G | A | 0.395 | -0.037 | 0.007 | 1.22646E-08 | Yang |
| CSF | IL-16                   | Q14005 | rs17875509 | 15 | 81590775  | G | C | 0.903 | -0.070 | 0.006 | 1.14699E-27 | Yang |
| CSF | IL-17 sR                | Q96F46 | rs2286951  | 22 | 17612744  | G | A | 0.794 | 0.063  | 0.008 | 1.5343E-16  | Yang |

|     |                     |                |            |    |           |   |   |       |        |       |             |      |
|-----|---------------------|----------------|------------|----|-----------|---|---|-------|--------|-------|-------------|------|
| CSF | IL-18 Ra            | Q13478         | rs1362350  | 2  | 102951798 | G | C | 0.510 | 0.144  | 0.005 | 1.3252E-165 | Yang |
| CSF | IL-22               | Q9GZX6         | rs11177138 | 12 | 68652776  | G | A | 0.806 | -0.071 | 0.005 | 4.94314E-47 | Yang |
| CSF | IL-34               | Q6ZMJ4         | rs36097154 | 16 | 70662816  | G | A | 0.662 | -0.048 | 0.004 | 1.51473E-38 | Yang |
| CSF | IL-6 sRa            | P08887         | rs4129267  | 1  | 154426264 | T | C | 0.410 | 0.112  | 0.005 | 1.1384E-105 | Yang |
| CSF | IL-9                | P15248         | rs2069885  | 5  | 135228165 | G | A | 0.877 | -0.115 | 0.010 | 1.1559E-31  | Yang |
| CSF | IL-9                | P15248         | rs7711775  | 5  | 135270062 | A | C | 0.034 | 0.141  | 0.025 | 1.52753E-08 | Yang |
| CSF | ILT-2               | Q8NHL6         | rs2114511  | 19 | 55145093  | G | C | 0.933 | -0.230 | 0.015 | 6.70529E-52 | Yang |
| CSF | Kallikrein 11       | Q9UBX7         | rs2691258  | 19 | 51517286  | G | A | 0.417 | 0.083  | 0.007 | 2.77051E-35 | Yang |
| CSF | kallikrein 8        | O60259         | rs2659091  | 19 | 51446530  | G | A | 0.625 | -0.047 | 0.005 | 5.73384E-19 | Yang |
| CSF | Layilin             | Q6UX15         | rs674230   | 11 | 111437887 | G | A | 0.648 | -0.077 | 0.007 | 7.58509E-32 | Yang |
| CSF | LEG9                | O00182         | rs3794195  | 17 | 25959355  | G | A | 0.217 | -0.026 | 0.004 | 1.61025E-11 | Yang |
| CSF | LRP8                | Q14114         | rs12031155 | 1  | 53714139  | T | C | 0.389 | 0.051  | 0.006 | 4.19692E-18 | Yang |
| CSF | Luteinizing hormone | P01215, P01229 | rs75287599 | 19 | 49517140  | T | C | 0.073 | -0.190 | 0.019 | 2.11166E-22 | Yang |
| CSF | LY86                | O95711         | rs7757934  | 6  | 6578927   | G | A | 0.272 | -0.037 | 0.004 | 5.33322E-20 | Yang |
| CSF | Lysozyme            | P61626         | rs57954211 | 12 | 69748397  | C | A | 0.568 | -0.081 | 0.005 | 5.39433E-62 | Yang |
| CSF | MIA                 | Q16674         | rs13108    | 19 | 41271104  | G | A | 0.084 | 0.080  | 0.013 | 3.96223E-10 | Yang |
| CSF | MIC-1               | Q99988         | rs7251610  | 19 | 18489734  | T | C | 0.317 | -0.047 | 0.006 | 3.86889E-13 | Yang |
| CSF | MIP-5               | Q16663         | rs7208990  | 17 | 34329475  | G | C | 0.063 | 0.145  | 0.011 | 2.48112E-42 | Yang |
| CSF | MMEL2               | Q495T6         | rs10909839 | 1  | 2708430   | G | A | 0.672 | 0.091  | 0.005 | 3.98332E-77 | Yang |
| CSF | MMP-2               | P08253         | rs1347653  | 16 | 55505040  | A | C | 0.181 | -0.032 | 0.004 | 2.15074E-14 | Yang |
| CSF | MMP-8               | P22894         | rs1939020  | 11 | 102590717 | T | G | 0.918 | 0.172  | 0.011 | 2.68598E-56 | Yang |
| CSF | MPIF-1              | P55773         | rs76480185 | 17 | 34350933  | T | G | 0.024 | -0.088 | 0.013 | 2.00324E-11 | Yang |
| CSF | MSP                 | P26927         | rs2172252  | 3  | 49678307  | T | A | 0.307 | -0.268 | 0.013 | 1.57305E-91 | Yang |

|            |                           |        |             |    |           |   |   |       |        |       |             |      |
|------------|---------------------------|--------|-------------|----|-----------|---|---|-------|--------|-------|-------------|------|
| <b>CSF</b> | N-terminal pro-BNP        | P16860 | rs12406383  | 1  | 11921993  | C | A | 0.727 | 0.052  | 0.006 | 4.92499E-19 | Yang |
| <b>CSF</b> | NADPH-P450 Oxidoreductase | P16435 | rs1057868   | 7  | 75615006  | T | C | 0.260 | -0.032 | 0.004 | 1.56335E-12 | Yang |
| <b>CSF</b> | NAGK                      | Q9UJ70 | rs9636398   | 2  | 71288817  | G | A | 0.824 | -0.031 | 0.005 | 4.85537E-10 | Yang |
| <b>CSF</b> | NET4                      | Q9HB63 | rs17287608  | 12 | 96119016  | C | A | 0.160 | -0.063 | 0.006 | 5.32466E-25 | Yang |
| <b>CSF</b> | NID2                      | Q14112 | rs6572807   | 14 | 52480621  | G | A | 0.273 | -0.035 | 0.004 | 4.17974E-21 | Yang |
| <b>CSF</b> | Nidogen                   | P14543 | rs2031487   | 1  | 236175339 | G | A | 0.534 | 0.021  | 0.004 | 1.40343E-09 | Yang |
| <b>CSF</b> | NRP1                      | O14786 | rs10827216  | 10 | 33509513  | G | A | 0.528 | -0.022 | 0.004 | 7.38944E-09 | Yang |
| <b>CSF</b> | OLR1                      | P78380 | rs11611438  | 12 | 10318409  | G | C | 0.922 | -0.072 | 0.010 | 1.87507E-12 | Yang |
| <b>CSF</b> | Osteocalcin               | P02818 | rs9943105   | 1  | 156245245 | T | C | 0.502 | -0.025 | 0.005 | 4.59302E-08 | Yang |
| <b>CSF</b> | Osteopontin               | P10451 | rs36018630  | 4  | 88774669  | T | C | 0.203 | 0.039  | 0.007 | 2.70028E-09 | Yang |
| <b>CSF</b> | P-Selectin                | P16109 | rs6678795   | 1  | 169533266 | G | A | 0.504 | 0.073  | 0.008 | 6.52672E-21 | Yang |
| <b>CSF</b> | PAFAH                     | Q13093 | rs6907892   | 6  | 46625886  | T | C | 0.362 | 0.100  | 0.006 | 1.60517E-62 | Yang |
| <b>CSF</b> | PCSK7                     | Q16549 | rs8521      | 11 | 117067699 | G | A | 0.267 | -0.089 | 0.005 | 3.13028E-73 | Yang |
| <b>CSF</b> | PCSK9                     | Q8NBP7 | rs499718    | 1  | 55512549  | T | C | 0.214 | -0.090 | 0.008 | 4.26829E-33 | Yang |
| <b>CSF</b> | PDGF Rb                   | P09619 | rs3776081   | 5  | 149532107 | G | A | 0.299 | -0.167 | 0.008 | 3.27283E-86 | Yang |
| <b>CSF</b> | Periostin                 | Q15063 | rs9547908   | 13 | 38069809  | T | C | 0.674 | -0.076 | 0.008 | 6.37731E-23 | Yang |
| <b>CSF</b> | PIGR                      | P01833 | rs2275529   | 1  | 207119853 | C | A | 0.706 | 0.108  | 0.014 | 4.70234E-14 | Yang |
| <b>CSF</b> | PLXC1                     | O60486 | rs2361355   | 12 | 94630029  | G | A | 0.437 | -0.036 | 0.006 | 2.33603E-09 | Yang |
| <b>CSF</b> | PPAC                      | P24666 | rs57542652  | 2  | 228088    | G | A | 0.677 | 0.237  | 0.008 | 6.0172E-180 | Yang |
| <b>CSF</b> | Prekallikrein             | P03952 | rs2304595   | 4  | 187172280 | G | A | 0.607 | 0.039  | 0.007 | 2.23303E-09 | Yang |
| <b>CSF</b> | PSMA                      | Q04609 | rs138800869 | 11 | 49038966  | G | A | 0.959 | 0.122  | 0.014 | 1.67422E-19 | Yang |
| <b>CSF</b> | REG4                      | Q9BYZ8 | rs2994816   | 1  | 120371217 | G | A | 0.246 | 0.049  | 0.007 | 2.49171E-11 | Yang |

|            |               |        |            |    |           |   |   |       |        |       |             |      |
|------------|---------------|--------|------------|----|-----------|---|---|-------|--------|-------|-------------|------|
| <b>CSF</b> | Semaphorin 3E | O15041 | rs2535371  | 7  | 83147251  | C | A | 0.820 | -0.177 | 0.014 | 3.77207E-35 | Yang |
| <b>CSF</b> | sFRP-3        | Q92765 | rs78177114 | 2  | 183730429 | G | A | 0.071 | 0.073  | 0.010 | 5.67295E-14 | Yang |
| <b>CSF</b> | sICAM-1       | P05362 | rs5498     | 19 | 10395683  | G | A | 0.425 | -0.170 | 0.005 | 1E-200      | Yang |
| <b>CSF</b> | SIG14         | Q08ET2 | rs7250849  | 19 | 52158316  | A | C | 0.119 | -0.214 | 0.014 | 3.00554E-51 | Yang |
| <b>CSF</b> | Siglec-3      | P20138 | rs3865444  | 19 | 51727962  | C | A | 0.702 | -0.160 | 0.007 | 7.3738E-111 | Yang |
| <b>CSF</b> | Siglec-7      | Q9Y286 | rs2075803  | 19 | 51628529  | G | A | 0.562 | 0.041  | 0.007 | 4.71885E-10 | Yang |
| <b>CSF</b> | Siglec-9      | Q9Y336 | rs2673908  | 19 | 51627766  | A | C | 0.395 | 1.127  | 0.032 | 1E-200      | Yang |
| <b>CSF</b> | sL-Selectin   | P14151 | rs72712053 | 1  | 169640642 | T | G | 0.760 | -0.059 | 0.005 | 2.86436E-32 | Yang |
| <b>CSF</b> | SLAF7         | Q9NQ25 | rs3766374  | 1  | 160720554 | G | A | 0.717 | -0.097 | 0.008 | 5.28357E-37 | Yang |
| <b>CSF</b> | sLeptin R     | P48357 | rs6665672  | 1  | 66069020  | G | A | 0.815 | -0.235 | 0.007 | 1E-200      | Yang |
| <b>CSF</b> | Spondin-1     | Q9HCB6 | rs7935294  | 11 | 13963974  | C | A | 0.430 | 0.027  | 0.004 | 2.31107E-10 | Yang |
| <b>CSF</b> | SREC-I        | Q14162 | rs62088045 | 17 | 1545333   | T | C | 0.034 | 0.155  | 0.014 | 5.32428E-27 | Yang |
| <b>CSF</b> | sTie-1        | P35590 | rs3768046  | 1  | 43766426  | G | A | 0.635 | -0.029 | 0.005 | 2.1058E-08  | Yang |
| <b>CSF</b> | Tenascin      | P24821 | rs72758637 | 9  | 117805201 | G | C | 0.158 | 0.211  | 0.009 | 9.982E-120  | Yang |
| <b>CSF</b> | Testican-2    | Q92563 | rs1245546  | 10 | 73846826  | T | C | 0.485 | -0.050 | 0.005 | 3.62659E-24 | Yang |
| <b>CSF</b> | TFPI          | P10646 | rs13035938 | 2  | 188390112 | G | A | 0.263 | 0.029  | 0.005 | 2.11369E-08 | Yang |
| <b>CSF</b> | TIG2          | Q99969 | rs10282458 | 7  | 150045302 | G | A | 0.729 | 0.019  | 0.003 | 1.22615E-08 | Yang |
| <b>CSF</b> | TIMD3         | Q8TDQ0 | rs6874178  | 5  | 156530149 | T | A | 0.817 | 0.091  | 0.007 | 1.79198E-38 | Yang |
| <b>CSF</b> | TNFSF15       | O95150 | rs6478109  | 9  | 117568766 | G | A | 0.715 | 0.058  | 0.005 | 6.18792E-29 | Yang |
| <b>CSF</b> | TPSB2         | P20231 | rs1054648  | 16 | 1271471   | T | C | 0.104 | 0.458  | 0.023 | 4.70998E-88 | Yang |
| <b>CSF</b> | TrATPase      | P13686 | rs8112083  | 19 | 11707266  | G | A | 0.285 | 0.046  | 0.005 | 1.04548E-18 | Yang |
| <b>CSF</b> | TSG-6         | P98066 | rs6433375  | 2  | 152208657 | G | A | 0.522 | 0.052  | 0.007 | 2.44076E-12 | Yang |
| <b>CSF</b> | TSP4          | P35443 | rs2438638  | 5  | 79390200  | G | A | 0.650 | 0.040  | 0.005 | 4.79607E-15 | Yang |

|            |             |        |            |    |           |   |   |       |        |       |             |      |
|------------|-------------|--------|------------|----|-----------|---|---|-------|--------|-------|-------------|------|
| <b>CSF</b> | ULBP-3      | Q9BZM4 | rs12661513 | 6  | 150373839 | C | A | 0.866 | -0.068 | 0.005 | 9.35689E-36 | Yang |
| <b>CSF</b> | Vitronectin | P04004 | rs708100   | 17 | 26688663  | G | A | 0.525 | -0.418 | 0.014 | 1.5115E-198 | Yang |
| <b>CSF</b> | vWF         | P04275 | rs1558325  | 12 | 6289108   | G | A | 0.559 | 0.037  | 0.006 | 5.92648E-09 | Yang |
| <b>CSF</b> | WFKN2       | Q8TEU8 | rs11868519 | 17 | 48920101  | T | C | 0.655 | 0.130  | 0.008 | 1.36159E-66 | Yang |
| <b>CSF</b> | YKL-40      | P36222 | rs880633   | 1  | 203152801 | G | A | 0.501 | 0.196  | 0.007 | 1.4139E-185 | Yang |



**Supplementary Table 2 Genetic instruments of multiple sclerosis for bidirectional MR**

| SNP        | chr | pos       | effect allele | other allele | beta         | se          | pval      |
|------------|-----|-----------|---------------|--------------|--------------|-------------|-----------|
| rs10801908 | 1   | 117090493 | C             | T            | 0.261363764  | 0.014770144 | 4.549E-70 |
| rs11256593 | 10  | 6117322   | T             | C            | 0.187474922  | 0.010989361 | 2.962E-65 |
| rs438613   | 3   | 28072086  | C             | T            | 0.140109708  | 0.009486438 | 2.305E-49 |
| rs1800693  | 12  | 6440009   | T             | C            | -0.139262067 | 0.009632326 | 2.239E-47 |
| rs6670198  | 1   | 2520527   | C             | T            | -0.128174339 | 0.01015257  | 1.541E-36 |
| rs62420820 | 6   | 137438057 | A             | G            | 0.134880482  | 0.010805233 | 9.257E-36 |
| rs1738074  | 6   | 159465977 | T             | C            | -0.124656605 | 0.010071612 | 3.48E-35  |
| rs35540610 | 2   | 231121829 | C             | T            | 0.133043774  | 0.011073609 | 2.982E-33 |
| rs1323292  | 1   | 192541021 | A             | G            | 0.150572858  | 0.012549928 | 3.644E-33 |
| rs1077667  | 19  | 6668972   | C             | T            | 0.143753964  | 0.012045878 | 7.882E-33 |
| rs35486093 | 1   | 85729820  | A             | G            | -0.189829672 | 0.016293003 | 2.268E-31 |
| rs2150879  | 17  | 57859210  | G             | A            | 0.110019645  | 0.00948324  | 4.05E-31  |
| rs701006   | 12  | 58106836  | G             | A            | 0.116893751  | 0.010140719 | 9.626E-31 |
| rs11809700 | 1   | 93152635  | C             | T            | -0.122280635 | 0.010698023 | 2.954E-30 |
| rs9843355  | 3   | 119228508 | G             | A            | 0.141933496  | 0.01244932  | 4.138E-30 |
| rs4939490  | 11  | 60793651  | G             | C            | 0.116626812  | 0.010354806 | 1.997E-29 |
| rs4896153  | 6   | 135833463 | A             | T            | -0.109033921 | 0.009704064 | 2.717E-29 |
| rs72928038 | 6   | 90976768  | G             | A            | -0.14352401  | 0.012888292 | 8.38E-29  |
| rs10063294 | 5   | 35877505  | A             | G            | -0.11945944  | 0.010782107 | 1.579E-28 |
| rs1026916  | 17  | 40529835  | G             | A            | -0.108030744 | 0.009781043 | 2.32E-28  |
| rs1014486  | 3   | 159691112 | C             | T            | 0.104360015  | 0.009471865 | 3.133E-28 |
| rs6589706  | 11  | 118747813 | A             | G            | 0.104360015  | 0.009881889 | 4.531E-26 |

|            |    |           |   |   |              |             |           |
|------------|----|-----------|---|---|--------------|-------------|-----------|
| rs11749040 | 5  | 40396425  | G | A | -0.139377016 | 0.013476646 | 4.544E-25 |
| rs4808760  | 19 | 18301979  | G | C | -0.113168698 | 0.010967862 | 5.83E-25  |
| rs12478539 | 2  | 43355324  | G | C | 0.110198792  | 0.010784893 | 1.649E-24 |
| rs1250551  | 10 | 81059335  | G | T | -0.096180558 | 0.009627069 | 1.675E-23 |
| rs28703878 | 8  | 79417222  | A | G | -0.102475792 | 0.010627183 | 5.273E-22 |
| rs3809627  | 16 | 30103160  | A | C | -0.09014355  | 0.009433775 | 1.231E-21 |
| rs140522   | 22 | 50971266  | C | T | -0.109591677 | 0.011476433 | 1.306E-21 |
| rs67111717 | 5  | 176790162 | G | A | 0.099030523  | 0.010472136 | 3.182E-21 |
| rs12925972 | 16 | 79111297  | C | T | 0.101653654  | 0.011198181 | 1.109E-19 |
| rs9610458  | 22 | 22205353  | T | C | 0.085535288  | 0.009427762 | 1.161E-19 |
| rs9591325  | 13 | 50811220  | T | C | 0.205061044  | 0.022625079 | 1.264E-19 |
| rs2248137  | 20 | 52789743  | G | C | -0.087957279 | 0.009753861 | 1.921E-19 |
| rs12365699 | 11 | 118743286 | G | A | 0.116626812  | 0.012947065 | 2.099E-19 |
| rs1177228  | 2  | 61242410  | G | A | 0.091028298  | 0.010117271 | 2.313E-19 |
| rs1076928  | 6  | 36348689  | C | T | -0.122167634 | 0.013606757 | 2.746E-19 |
| rs1087056  | 10 | 31395761  | G | A | -0.084142768 | 0.009399492 | 3.496E-19 |
| rs60600003 | 7  | 37382465  | T | G | -0.136278018 | 0.015275065 | 4.596E-19 |
| rs2546890  | 5  | 158759900 | A | G | 0.084157308  | 0.00944978  | 5.303E-19 |
| rs10951042 | 7  | 3139417   | C | T | 0.097217451  | 0.011060327 | 1.499E-18 |
| rs9878602  | 3  | 71535338  | T | G | 0.095491981  | 0.010898118 | 1.914E-18 |
| rs1465697  | 19 | 49837246  | C | T | -0.092883127 | 0.010663243 | 3.023E-18 |
| rs1112718  | 10 | 94479107  | A | G | 0.082501222  | 0.009718205 | 2.078E-17 |
| rs35703946 | 16 | 86021505  | G | A | 0.123544186  | 0.01461449  | 2.826E-17 |

|            |    |           |   |   |              |             |           |
|------------|----|-----------|---|---|--------------|-------------|-----------|
| rs12434551 | 14 | 69253364  | A | T | 0.078996006  | 0.009394246 | 4.136E-17 |
| rs62013236 | 15 | 79247482  | C | T | 0.100749903  | 0.012104002 | 8.527E-17 |
| rs9909593  | 17 | 37970149  | A | G | -0.078069655 | 0.009379812 | 8.565E-17 |
| rs2986736  | 1  | 6512547   | T | C | -0.113392687 | 0.013631488 | 8.913E-17 |
| rs13327021 | 3  | 27783015  | C | T | -0.079909383 | 0.009682676 | 1.547E-16 |
| rs61863928 | 10 | 64449549  | G | T | 0.085351667  | 0.010443426 | 3.014E-16 |
| rs2317231  | 1  | 157686337 | G | T | 0.077331343  | 0.009472794 | 3.254E-16 |
| rs12622670 | 2  | 68646536  | T | C | 0.086269435  | 0.010638044 | 5.082E-16 |
| rs983494   | 1  | 160703965 | G | A | 0.083881484  | 0.010371894 | 6.096E-16 |
| rs6533052  | 4  | 103911781 | A | G | 0.088651698  | 0.01098525  | 7.026E-16 |
| rs72922276 | 1  | 65429319  | G | A | 0.152034156  | 0.01904055  | 1.408E-15 |
| rs12147246 | 14 | 103265844 | G | A | -0.09014355  | 0.011349566 | 1.982E-15 |
| rs405343   | 16 | 1067832   | G | T | -0.09629066  | 0.012205612 | 3.045E-15 |
| rs7731626  | 5  | 55444683  | G | A | 0.090206268  | 0.011478928 | 3.89E-15  |
| rs244656   | 5  | 133449827 | A | T | 0.105800419  | 0.013921323 | 2.964E-14 |
| rs6564681  | 16 | 79652720  | T | C | -0.077745349 | 0.010268424 | 3.695E-14 |
| rs6742     | 20 | 62374441  | C | T | 0.139066048  | 0.018400841 | 4.106E-14 |
| rs17724508 | 16 | 79350204  | T | C | 0.13374387   | 0.017816977 | 6.071E-14 |
| rs9308424  | 1  | 212877776 | A | G | -0.09036244  | 0.012127268 | 9.251E-14 |
| rs2269434  | 11 | 47360412  | T | C | -0.086756864 | 0.011739292 | 1.465E-13 |
| rs719316   | 6  | 16672760  | T | C | 0.069805874  | 0.009462219 | 1.615E-13 |
| rs6738544  | 2  | 191989356 | C | A | 0.071483102  | 0.009759756 | 2.402E-13 |
| rs7975763  | 12 | 123604053 | C | T | -0.081861026 | 0.011221762 | 2.99E-13  |

|            |    |           |   |   |              |             |           |
|------------|----|-----------|---|---|--------------|-------------|-----------|
| rs34695601 | 14 | 76014298  | T | C | 0.079919623  | 0.011083119 | 5.557E-13 |
| rs735542   | 8  | 128175696 | A | G | 0.070272053  | 0.009748526 | 5.658E-13 |
| rs249677   | 5  | 141539339 | C | A | -0.071173819 | 0.009876082 | 5.733E-13 |
| rs6496663  | 15 | 90887584  | A | C | -0.085884739 | 0.012072373 | 1.126E-12 |
| rs2289746  | 3  | 105455955 | C | T | 0.081211255  | 0.011739509 | 4.588E-12 |
| rs12614091 | 2  | 204632861 | A | T | 0.073250462  | 0.010653756 | 6.175E-12 |
| rs4409785  | 11 | 95311422  | T | C | -0.083816486 | 0.012217664 | 6.873E-12 |
| rs57116599 | 2  | 112770799 | A | G | -0.090252989 | 0.013288923 | 1.109E-11 |
| rs11231749 | 11 | 64095178  | C | T | 0.065881369  | 0.009702827 | 1.122E-11 |
| rs2705616  | 4  | 87862396  | G | C | -0.074400323 | 0.010963422 | 1.151E-11 |
| rs10245867 | 7  | 28142186  | G | T | -0.067315707 | 0.009931064 | 1.216E-11 |
| rs6837324  | 4  | 48127262  | A | G | -0.06443186  | 0.009525045 | 1.338E-11 |
| rs34681760 | 5  | 6712834   | C | T | 0.078718755  | 0.011739663 | 2.009E-11 |
| rs34536443 | 19 | 10463118  | G | C | 0.185649347  | 0.028007535 | 3.39E-11  |
| rs3184504  | 12 | 111884608 | T | C | 0.062317306  | 0.009448345 | 4.236E-11 |
| rs9955954  | 18 | 56348044  | G | A | -0.085557888 | 0.013011496 | 4.847E-11 |
| rs760517   | 22 | 37258986  | C | T | 0.067658648  | 0.010306624 | 5.218E-11 |
| rs1399180  | 10 | 8098719   | T | C | -0.096731189 | 0.014842103 | 7.156E-11 |
| rs7855251  | 9  | 100868189 | T | C | 0.074550731  | 0.011584367 | 1.231E-10 |
| rs6911131  | 6  | 143865221 | A | G | -0.11440126  | 0.017802212 | 1.308E-10 |
| rs17051321 | 4  | 122119449 | C | T | -0.080993159 | 0.012624902 | 1.405E-10 |
| rs2836438  | 21 | 39864727  | G | A | -0.100925919 | 0.015970091 | 2.621E-10 |
| rs10951154 | 7  | 27135314  | T | C | -0.076881044 | 0.012210379 | 3.047E-10 |

|            |    |           |   |   |              |             |           |
|------------|----|-----------|---|---|--------------|-------------|-----------|
| rs10191360 | 2  | 136884679 | T | C | 0.080288831  | 0.012826042 | 3.854E-10 |
| rs11125803 | 2  | 25052177  | T | C | -0.068492996 | 0.01103709  | 5.445E-10 |
| rs73414214 | 7  | 105706462 | C | A | 0.120623442  | 0.019513185 | 6.344E-10 |
| rs11919880 | 3  | 32962051  | A | G | 0.058551887  | 0.009516953 | 7.633E-10 |
| rs354033   | 7  | 149289464 | G | A | 0.078164021  | 0.012719595 | 7.988E-10 |
| rs11852059 | 14 | 52306091  | A | C | -0.090800364 | 0.014930377 | 1.19E-09  |
| rs7260482  | 19 | 45143942  | A | C | -0.074939087 | 0.012381475 | 1.426E-09 |
| rs6672420  | 1  | 25291010  | T | A | -0.061449962 | 0.01016285  | 1.48E-09  |
| rs10271373 | 7  | 138729795 | C | A | -0.055618424 | 0.009385992 | 3.11E-09  |
| rs4728142  | 7  | 128573967 | G | A | -0.056676177 | 0.009585939 | 3.371E-09 |
| rs8062446  | 16 | 57077094  | T | C | 0.084157308  | 0.01433115  | 4.297E-09 |
| rs2590438  | 3  | 187565968 | T | G | -0.066460367 | 0.011342906 | 4.651E-09 |
| rs9568402  | 13 | 50961957  | A | T | -0.086102699 | 0.014708711 | 4.803E-09 |
| rs72989863 | 4  | 164493807 | G | A | 0.063913326  | 0.010963189 | 5.549E-09 |
| rs12971909 | 19 | 4466466   | G | A | -0.069993372 | 0.012006855 | 5.561E-09 |
| rs962052   | 2  | 151644203 | C | T | 0.060906935  | 0.010569208 | 8.279E-09 |
| rs13066789 | 3  | 187987624 | C | T | 0.064476019  | 0.011387225 | 1.495E-08 |
| rs11899404 | 2  | 12607893  | T | C | -0.053189829 | 0.009423368 | 1.657E-08 |
| rs3923387  | 8  | 144986793 | T | C | 0.061941402  | 0.010993684 | 1.758E-08 |
| rs61708525 | 12 | 94661453  | G | A | 0.067845547  | 0.012050084 | 1.799E-08 |
| rs12211604 | 6  | 7100029   | A | G | -0.063365876 | 0.011315577 | 2.145E-08 |
| rs11578655 | 1  | 101412902 | T | G | -0.083055575 | 0.014969945 | 2.887E-08 |
| rs2469434  | 18 | 67544046  | T | C | -0.053189829 | 0.009590065 | 2.917E-08 |

|             |    |           |   |   |              |             |           |
|-------------|----|-----------|---|---|--------------|-------------|-----------|
| rs55858457  | 7  | 2443302   | G | T | -0.06443186  | 0.011620991 | 2.949E-08 |
| rs32658     | 5  | 118703662 | G | T | -0.061237309 | 0.011077767 | 3.24E-08  |
| rs1365120   | 11 | 36438075  | T | C | -0.09145761  | 0.016663946 | 4.057E-08 |
| rs17741873  | 10 | 75653800  | G | T | 0.065413139  | 0.011974219 | 4.686E-08 |
| rs9900529   | 17 | 73335776  | C | G | 0.062786988  | 0.0114995   | 4.762E-08 |
| rs6020055   | 20 | 48422095  | A | G | 0.057417271  | 0.010540769 | 5.118E-08 |
| rs9808753   | 21 | 34787312  | G | A | 0.07881118   | 0.013060198 | 1.595E-09 |
| rs6072343   | 20 | 39968188  | G | A | -0.078394067 | 0.0131769   | 2.692E-09 |
| rs6498163   | 16 | 11213951  | T | C | -0.178289696 | 0.00999597  | 3.703E-71 |
| rs116899835 | 14 | 88523488  | C | T | 0.286381227  | 0.024946573 | 1.667E-30 |
| rs7819665   | 8  | 129177769 | T | C | -0.117545564 | 0.011308217 | 2.621E-25 |
| rs111635774 | 6  | 14691215  | C | T | 0.105080476  | 0.012309492 | 1.383E-17 |
| rs77654077  | 13 | 100026952 | A | C | 0.104360015  | 0.012547005 | 8.982E-17 |
| rs116877451 | 7  | 50328339  | A | G | 0.087278008  | 0.010654831 | 2.582E-16 |
| rs79979643  | 1  | 32738415  | G | A | -0.123863987 | 0.015517278 | 1.436E-15 |
| rs570429157 | 11 | 14868316  | A | G | -0.252057561 | 0.036928366 | 8.757E-12 |
| rs111430408 | 3  | 100848597 | C | T | 0.144706221  | 0.022147792 | 6.418E-11 |
| rs78727559  | 8  | 95851818  | T | G | -0.142255048 | 0.022624851 | 3.225E-10 |
| rs11542663  | 6  | 119215402 | A | C | 0.074736346  | 0.011887932 | 3.242E-10 |
| rs75937181  | 3  | 121783015 | T | G | 0.113239396  | 0.018446922 | 8.322E-10 |

**Supplementary Table 3 Heterogeneity analysis on proteins with two or more instruments**

| <b>Tissue</b> | <b>Protein</b> | <b>Number of SNPs used</b> | <b>Q statistics</b> | <b>P-value (heterogeneity)</b> |
|---------------|----------------|----------------------------|---------------------|--------------------------------|
| Plasma        | SPARCL1        | 2                          | 0.020845305         | 0.885201173                    |
| Plasma        | GPC5           | 2                          | 0.383150854         | 0.535921758                    |
| Plasma        | SERPINA4       | 2                          | 0.295781135         | 0.586539439                    |
| CSF           | IL-9           | 2                          | 0.520012298         | 0.470836436                    |
| CSF           | GPC5           | 2                          | 0.701911038         | 0.402142302                    |

**Supplementary Table 4 Previously-reported genome-wide significant association of SNPs as genetic instruments of six potential causal proteins**

| tissue | protein | UniProt ID | SNP       | traits                                                         | catalog | effect allele | proxy SNP | r2       | proxy effect allele | beta | se          | pval     | ancestry | pmid     |
|--------|---------|------------|-----------|----------------------------------------------------------------|---------|---------------|-----------|----------|---------------------|------|-------------|----------|----------|----------|
| Plasma | FCRL3   | Q96P31     | rs7528684 | Insulinoma associated antigen 2 positive IA 2A Type 1 diabetes | GWAS    | G             |           |          |                     |      |             | 8.3E-12  | Mixed    | 21829393 |
| Plasma | FCRL3   | Q96P31     | rs7528684 | Type 1 diabetes autoantibodies                                 | GWAS    | G             |           |          |                     |      |             | 1E-11    | Mixed    | 21829393 |
| Plasma | FCRL3   | Q96P31     | rs7528684 | Diabetes mellitus type 1                                       | GWAS    | G             |           |          |                     |      |             | 1E-11    | Mixed    | 21829393 |
| Plasma | FCRL3   | Q96P31     | rs7528684 | Positivity for ZnT8A in Type 1 diabetes                        | GWAS    | G             | rs7522061 | 0.90     | C                   |      |             | 1.13E-16 | European | 22526605 |
| Plasma | FCRL3   | Q96P31     | rs7528684 | Positivity for ZnT8RA in Type 1 diabetes                       | GWAS    | G             | rs7522061 | 0.90     | C                   |      |             | 1.74E-11 | European | 22526605 |
| Plasma | FCRL3   | Q96P31     | rs7528684 | Positivity for ZnT8WA in Type 1 diabetes                       | GWAS    | G             | rs7522061 | 0.90     | C                   |      |             | 8.13E-12 | European | 22526605 |
| Plasma | FCRL3   | Q96P31     | rs7528684 | Fc receptor-like protein 4                                     | pQTL    | G             | rs7522061 | 0.90     | C                   | 0.38 | 0.02        | 2E-55    | European | 29875488 |
| Plasma | FCRL3   | Q96P31     | rs7528684 | Immunoglobulin superfamily member 11                           | pQTL    | G             | rs3761959 | 0.997958 | T                   | 0.05 | 0.00748946  | 2.45E-11 | European | 34857953 |
| Plasma | FCRL3   | Q96P31     | rs7528684 | Killer cell immunoglobulin-like                                | pQTL    | G             | rs2317230 | 0.9324   | T                   | 0.05 | 0.008299695 | 1.70E-09 | European | 34857953 |



|        |      |        |          |                                                        |      |   |           |      |   |       |      |           |          |          |
|--------|------|--------|----------|--------------------------------------------------------|------|---|-----------|------|---|-------|------|-----------|----------|----------|
|        |      |        |          | receptor<br>3DL3                                       |      |   |           |      |   |       |      |           |          |          |
| Plasma | TYMP | P19971 | rs131798 | Mean<br>corpuscular<br>hemoglobin                      | GWAS | G |           |      |   | 0.08  | 0.00 | 2.541E-68 | European | 27863252 |
| Plasma | TYMP | P19971 | rs131798 | Mean<br>corpuscular<br>volume                          | GWAS | G |           |      |   | 0.09  | 0.00 | 1.07E-94  | European | 27863252 |
| Plasma | TYMP | P19971 | rs131798 | Red blood<br>cell count                                | GWAS | G | rs131795  | 1.00 | T | -0.05 | 0.00 | 6.455E-34 | European | 27863252 |
| Plasma | TYMP | P19971 | rs131798 | Red cell<br>distribution<br>width                      | GWAS | G | rs131795  | 1.00 | T | -0.03 | 0.00 | 5.725E-11 | European | 27863252 |
| Plasma | TYMP | P19971 | rs131798 | Mean<br>corpuscular<br>hemoglobin<br>concentration     | GWAS | G | rs131794  | 1.00 | C |       |      | 1.81E-12  | Mixed    | 23222517 |
| Plasma | TYMP | P19971 | rs131798 | Mean<br>corpuscular<br>volume                          | GWAS | G | rs131794  | 1.00 | C |       |      | 1.85E-16  | Mixed    | 23222517 |
| Plasma | TYMP | P19971 | rs131798 | Mean<br>corpuscular<br>volume                          | GWAS | G | rs131794  | 1.00 | C | 0.00  |      | 1E-15     | European | 19862010 |
| Plasma | TYMP | P19971 | rs131798 | Erythrocyte<br>indices                                 | GWAS | G | rs131794  | 1.00 | C |       |      | 1E-15     | European | 19862010 |
| Plasma | TYMP | P19971 | rs131798 | Granulocyte<br>percentage of<br>myeloid<br>white cells | GWAS | G | rs4824129 | 0.99 | G | -0.03 | 0.00 | 6.723E-09 | European | 27863252 |
| Plasma | TYMP | P19971 | rs131798 | Monocyte<br>percentage of<br>white cells               | GWAS | G | rs4824129 | 0.99 | G | 0.03  | 0.00 | 1.002E-08 | European | 27863252 |
| Plasma | TYMP | P19971 | rs131798 | Reticulocyte<br>count                                  | GWAS | G | rs4824129 | 0.99 | G | -0.03 | 0.00 | 4.585E-12 | European | 27863252 |
| Plasma | TYMP | P19971 | rs131798 | Uridine                                                | mQTL | G | rs131794  | 1.00 | C | -0.01 | 0.00 | 4.367E-16 | European | 24816252 |
| Plasma | TYMP | P19971 | rs131798 | 2-<br>deoxyuridine                                     | mQTL | G | rs131793  | 1.00 | A |       |      | 1.335E-18 | European | 28263315 |

|        |       |        |            |                                         |      |   |            |      |   |       |      |           |          |          |
|--------|-------|--------|------------|-----------------------------------------|------|---|------------|------|---|-------|------|-----------|----------|----------|
| Plasma | TYMP  | P19971 | rs131798   | 5-methyluridine                         | mQTL | G | rs131793   | 1.00 | A | 0.68  | 0.05 | 7.486E-60 | European | 28263315 |
| Plasma | TYMP  | P19971 | rs131798   | 5-methyluridine (ribothymidine)         | mQTL | G | rs131793   | 1.00 | A | 0.68  | 0.05 | 7.486E-60 | European | 28263315 |
| Plasma | TYMP  | P19971 | rs131798   | 5,6-dihydrothymine                      | mQTL | G | rs4824129  | 0.99 | G | -0.19 | 0.05 | 1.888E-08 | European | 28263315 |
| Plasma | AHSG  | P02765 | rs35094235 | Activated partial thromboplastin time   | GWAS | G | rs10937255 | 1.00 | G |       |      | 4.335E-09 | European | 22703881 |
| CSF    | MMEL1 | Q495T6 | rs10909839 | Primary sclerosing cholangitis          | GWAS | G |            |      |   | 0.19  | 0.03 | 3.164E-08 | European | 27992413 |
| CSF    | MMEL1 | Q495T6 | rs10909839 | Multiple sclerosis                      | GWAS | G | rs4648356  | 1.00 | C |       |      | 1E-14     | European | 21833088 |
| CSF    | MMEL1 | Q495T6 | rs10909839 | Rheumatoid arthritis and celiac disease | GWAS | G | rs4648356  | 1.00 | C |       |      | 4.28E-10  | European | 21383967 |
| CSF    | MMEL1 | Q495T6 | rs10909839 | Rheumatoid arthritis                    | GWAS | G | rs41300092 | 1.00 | C | 0.09  | 0.01 | 3.7E-12   | Mixed    | 24390342 |
| CSF    | CD5L  | O43866 | rs6427401  | Fc receptor-like protein 1              | pQTL | G | rs7546623  | 1.00 | T | 0.24  | 0.02 | 4.79E-23  | European | 29875488 |

**Supplementary Table 5 Linkage disequilibrium  $r^2$  among SNPs of six potential causal proteins**

| Tissue | Protein | UniProt | SNP        | rs7528684  | rs131798 | rs35094235 | rs6427401  | rs10909839 | rs3766374 |
|--------|---------|---------|------------|------------|----------|------------|------------|------------|-----------|
| Plasma | FCRL3   | Q96P31  | rs7528684  | 1          | NA       | NA         | 0.65011969 | NA         | NA        |
| Plasma | TYMP    | P19971  | rs131798   | NA         | 1        | NA         | NA         | NA         | NA        |
| Plasma | AHSG    | P02765  | rs35094235 | NA         | NA       | 1          | NA         | NA         | NA        |
| CSF    | CD5L    | O43866  | rs6427401  | 0.65011969 | NA       | NA         | 1          | NA         | NA        |
| CSF    | MMEL2   | Q495T6  | rs10909839 | NA         | NA       | NA         | NA         | 1          | NA        |
| CSF    | SLAF7   | Q9NQ25  | rs3766374  | NA         | NA       | NA         | NA         | NA         | 1         |

**Supplementary Table 6 13 Medications for multiple sclerosis and the corresponding drug targets**

| Medication                            | Target                                                     | Gene Name | Uniprot ID | Pharmacological Action | Action    |
|---------------------------------------|------------------------------------------------------------|-----------|------------|------------------------|-----------|
| <b>Interferons</b>                    |                                                            |           |            |                        |           |
| Interferon beta                       | Interferon alpha/beta receptor 1                           | IFNAR1    | P17181     | Yes                    | Binder    |
| Amino acid copolymer                  |                                                            |           |            |                        |           |
| Glatiramer acetate                    | HLA class II histocompatibility antigen, DRB1-1 beta chain | DRB1-1    | Q31063     | Unknown                | Binder    |
| <b>S1P receptor modulators</b>        |                                                            |           |            |                        |           |
| Fingolimod                            | Sphingosine 1-phosphate receptor 5                         | S1PR5     | Q9H228     | Yes                    | Modulator |
|                                       | Sphingosine 1-phosphate receptor 1                         | S1PR1     | P21453     | Yes                    | Modulator |
|                                       | Sphingosine 1-phosphate receptor 3                         | S1PR3     | Q99500     | Yes                    | Modulator |
|                                       | Histone deacetylase 1                                      | HDAC1     | Q13547     | Unknown                | Inhibitor |
|                                       | Sphingosine 1-phosphate receptor 4                         | S1PR4     | O95977     | Unknown                | Modulator |
| Siponimod                             | Sphingosine 1-phosphate receptor 5                         | S1PR5     | Q9H228     | Unknown                | Modulator |
|                                       | Sphingosine 1-phosphate receptor 1                         | S1PR1     | P21453     | Unknown                | Unknown   |
| Ozanimod                              | Sphingosine 1-phosphate receptor 1                         | S1PR1     | P21453     | Yes                    | Agonist   |
|                                       | Sphingosine 1-phosphate receptor 5                         | S1PR5     | Q9H228     | Yes                    | Agonist   |
| <b>Fumarates</b>                      |                                                            |           |            |                        |           |
| Dimethyl fumarate                     | Kelch-like ECH-associated protein 1                        | KEAP1     | Q14145     | Yes                    | Binder    |
|                                       | Transcription factor p65                                   | RELA      | Q04206     | Unknown                | Unknown   |
| Diroximel fumarate                    | Neuronal acetylcholine receptor subunit alpha-10           | CHRNA10   | Q9GZZ6     | Unknown                | Agonist   |
| <b>Pyrimidine synthesis inhibitor</b> |                                                            |           |            |                        |           |
| Teriflunomide                         | Dihydroorotate dehydrogenase (quinone), mitochondrial      | DHODH     | Q02127     | Unknown                | Inhibitor |
| <b>Purine analogue</b>                |                                                            |           |            |                        |           |

|                                                                        |                                                            |        |        |         |           |
|------------------------------------------------------------------------|------------------------------------------------------------|--------|--------|---------|-----------|
| Cladribine                                                             | Ribonucleoside-diphosphate reductase large subunit         | RRM1   | P23921 | Yes     | Inhibitor |
|                                                                        | Ribonucleoside-diphosphate reductase subunit M2            | RRM2   | P31350 | Yes     | Inhibitor |
|                                                                        | Ribonucleoside-diphosphate reductase subunit M2 B          | RRM2B  | Q7LG56 | Yes     | Inhibitor |
|                                                                        | DNA polymerase alpha catalytic subunit                     | POLA1  | P09884 | Yes     | Inhibitor |
|                                                                        | DNA polymerase epsilon catalytic subunit A                 | POLE   | Q07864 | Yes     | Inhibitor |
|                                                                        | DNA polymerase epsilon subunit 2                           | POLE2  | P56282 | Yes     | Inhibitor |
|                                                                        | DNA polymerase epsilon subunit 3                           | POLE3  | Q9NRF9 | Yes     | Inhibitor |
|                                                                        | DNA polymerase epsilon subunit 4                           | POLE4  | Q9NR33 | Yes     | Inhibitor |
|                                                                        | Purine nucleoside phosphorylase                            | PNP    | P00491 | Yes     | Inducer   |
| <b>Anti-<math>\alpha</math>4 integrin receptor monoclonal antibody</b> |                                                            |        |        |         |           |
| Natalizumab                                                            | Integrin alpha-4                                           | ITGA4  | P13612 | Yes     | Antibody  |
|                                                                        | Low affinity immunoglobulin gamma Fc region receptor III-B | FCGR3B | O75015 | Unknown | Unknown   |
|                                                                        | Intercellular adhesion molecule 1                          | ICAM1  | P05362 | Unknown | Unknown   |
|                                                                        | High affinity immunoglobulin gamma Fc receptor I           | FCGR1A | P12314 | Unknown | Unknown   |
| <b>Anti-CD20 monoclonal antibodies</b>                                 |                                                            |        |        |         |           |
| Ocrelizumab                                                            | B-lymphocyte antigen CD20                                  | MS4A1  | P11836 | Yes     | Antibody  |
| Ofatumumab                                                             | B-lymphocyte antigen CD20                                  | MS4A1  | P11836 | Yes     | Antibody  |
| <b>Anti-CD52 monoclonal antibody</b>                                   |                                                            |        |        |         |           |
| Alemtuzumab                                                            | CAMPATH-1 antigen                                          | CD52   | P31358 | Yes     | Antibody  |
|                                                                        | Low affinity immunoglobulin gamma Fc region receptor III-B | FCGR3B | O75015 | Unknown | Unknown   |
|                                                                        | Low affinity immunoglobulin gamma Fc region receptor III-A | FCGR3A | P08637 | Unknown | Unknown   |
|                                                                        | High affinity immunoglobulin gamma Fc receptor I           | FCGR1A | P12314 | Unknown | Unknown   |

|  |                                                              |        |        |         |         |
|--|--------------------------------------------------------------|--------|--------|---------|---------|
|  | Low affinity immunoglobulin gamma Fc region<br>receptor II-a | FCGR2A | P12318 | Unknown | Unknown |
|--|--------------------------------------------------------------|--------|--------|---------|---------|

**Supplementary Table 7 Current medications targeting six potential causal proteins**

| Target                                | Gene   | Uniprot ID | Medication   | Indication                                                                                                                                     | Route                 | Actions   |
|---------------------------------------|--------|------------|--------------|------------------------------------------------------------------------------------------------------------------------------------------------|-----------------------|-----------|
| Fc receptor-like protein 3            | FCRL3  | Q96P31     | N/A          | N/A                                                                                                                                            | N/A                   | N/A       |
| Thymidine phosphorylase               | TYMP   | P19971     | Capecitabine | For the treatment of patients with metastatic breast cancer resistant to both paclitaxel and an anthracycline-containing chemotherapy regimen. | Oral                  | Inhibitor |
|                                       |        |            | Floxuridine  | For palliative management of gastrointestinal adenocarcinoma metastatic to the liver.                                                          | Intra-arterial        | Inducer   |
|                                       |        |            | Fluorouracil | For the topical treatment of multiple actinic or solar keratoses.                                                                              | Intravenous & topical | Inhibitor |
| Alpha-2-HS-glycoprotein               | AHSG   | P02765     | N/A          | N/A                                                                                                                                            | N/A                   | N/A       |
| CD5 antigen-like                      | CD5L   | O43866     | N/A          | N/A                                                                                                                                            | N/A                   | N/A       |
| Membrane metallo-endopeptidase-like 1 | MMEL1  | Q495T6     | N/A          | N/A                                                                                                                                            | N/A                   | N/A       |
| SLAM family member 7                  | SLAMF7 | Q9NQ25     | Elotuzumab   | For the treatment of refractory multiple myeloma in combination with other antineoplastic agents.                                              | Intravenous           | Modulator |

**Supplementary Table 8 Genetic instruments of six potential causal proteins for external validation**

| Tissue | Protein | SNP        | Strategy            | chr | pos       | effect allele | other allele | beta        | se          | pval      | Study       |
|--------|---------|------------|---------------------|-----|-----------|---------------|--------------|-------------|-------------|-----------|-------------|
| Plasma | FCRL3   | rs7528684  | same-variant        | 1   | 157670816 | A             | G            | -0.8076     | 0.0114      | 1E-200    | Pietzner    |
| Plasma | TYMP    | rs131798   | same-variant        | 22  | 50971509  | T             | G            | -0.0339     | 0.0155      | 0.02863   | Pietzner    |
| Plasma | AHSG    | rs35094235 | same-variant        | 3   | 186328951 | T             | G            | -0.556      | 0.014       | 1E-200    | Pietzner    |
| Plasma | FCRL3   | rs7528684  | same-variant        | 1   | 157670816 | G             | A            | 0.5584      | 0.006222    | 1E-200    | Ferkingstad |
| Plasma | TYMP    | rs131798   | same-variant        | 22  | 50971509  | G             | T            | 0.0488      | 0.009571    | 3.421E-07 | Ferkingstad |
| Plasma | AHSG    | rs35094235 | same-variant        | 3   | 186328951 | G             | T            | 0.3566      | 0.007573    | 1E-200    | Ferkingstad |
| Brain  | MMEL1   | rs10909839 | same-variant        | 1   | 2708430   | G             | A            | 0.00642189  | 0.00323586  | 0.0479808 | Yang        |
| Brain  | SLAMF7  | rs3766374  | same-variant        | 1   | 160720554 | G             | A            | 0.000951099 | 0.00367899  | 0.796161  | Yang        |
| Brain  | CD5L    | rs6427401  | same-variant        | 1   | 157748564 | G             | A            | 0.0190219   | 0.0175076   | 0.278018  | Yang        |
| Plasma | FCRL3   | rs7522061  | significant-variant | 1   | 157668390 | T             | C            | -0.8073     | 0.0112      | 1E-200    | Pietzner    |
| Plasma | AHSG    | rs10937258 | significant-variant | 3   | 186328342 | T             | G            | 0.5588      | 0.014       | 1E-200    | Pietzner    |
| Plasma | FCRL3   | rs7528684  | significant-variant | 1   | 157701026 | G             | A            | 0.56        | 0.014557779 | 1E-200    | Ferkingstad |
| Plasma | AHSG    | rs4686790  | significant-variant | 3   | 186604193 | G             | T            | -0.36       | 0.009358572 | 1E-200    | Ferkingstad |



**Supplementary Fig. 1 Bidirectional MR analysis for multiple sclerosis on levels of six potential causal proteins**

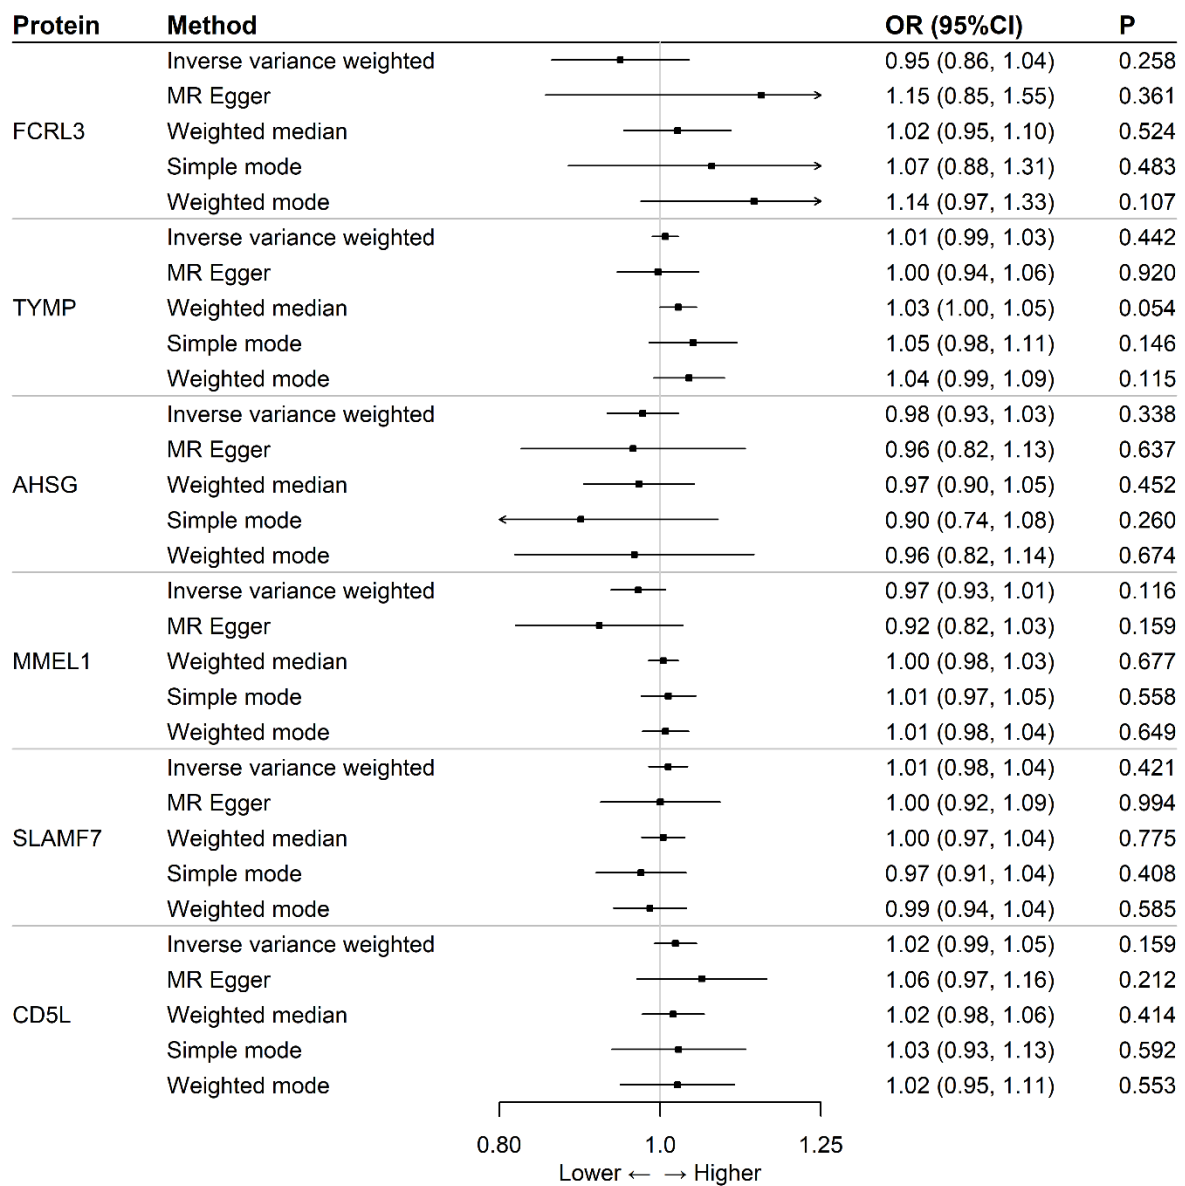

OR stood for the odds ratios for per standard deviation (SD) increase in plasma protein levels and per 10-fold increase in CSF protein levels as MS risk increased.

**Supplementary Fig. 2 Bayesian colocalization analysis of six potential causal proteins and multiple sclerosis**

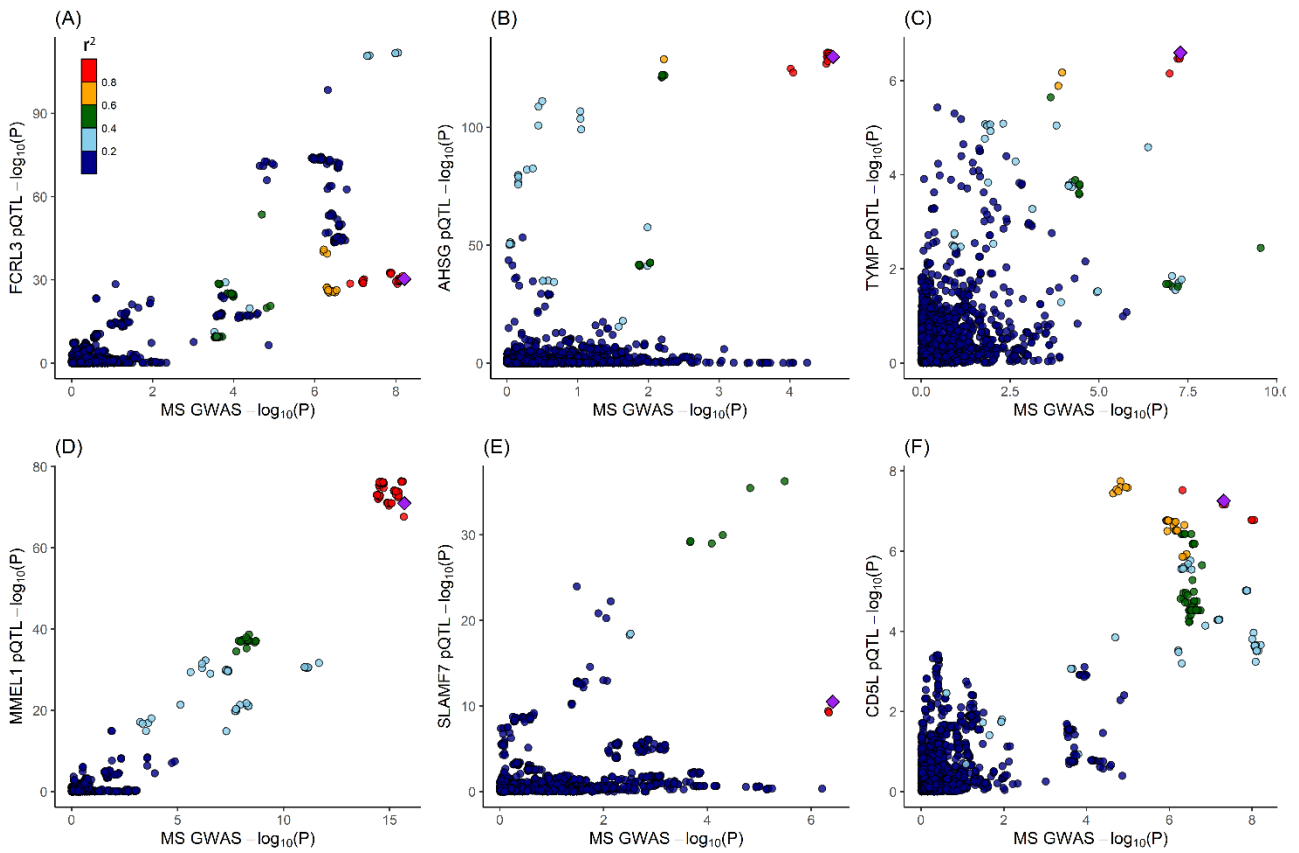

Colocalization analysis of plasma proteins for FCRL3 (A), TYMP (B) and AHSG (C), and CSF proteins for MMEL1 (D), SLAMF7 (E), and CD5L (F), respectively. Diamond purple points represented the SNP that with the minimal sum of  $P$  value in corresponded protein GWAS and multiple sclerosis GWAS.

### Supplementary Fig. 3 Comparison analysis of MR estimates between plasma proteome and CSF

proteome

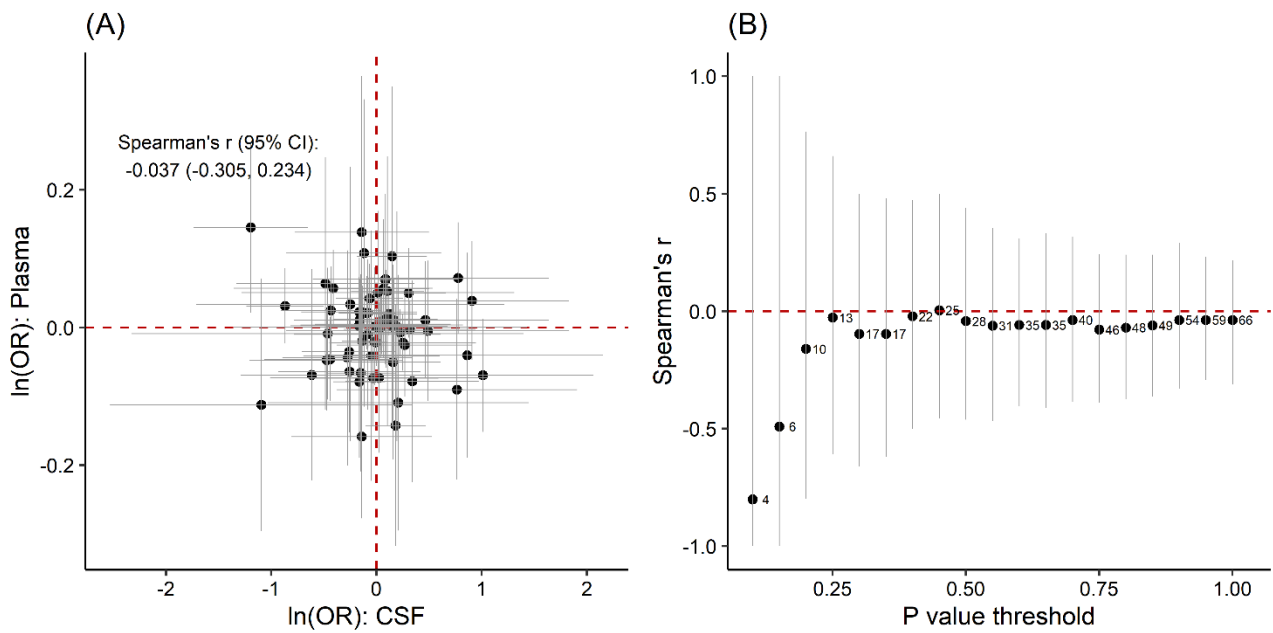

(A) All 66 overlapping proteins in plasma and CSF were used to perform correlation analysis. The horizontal and vertical gray line represented the 95% confidence interval of MR estimates in main analysis. The Spearman correlation coefficient was -0.037 (95% CI: -0.305, 0.234); (B) With different cutoff for  $P$  value to include MR estimates, Spearman correlation coefficient was calculated. The numbers on the left side of the black point represented the numbers of overlapping proteins correspondingly.

**Supplementary Fig. 4 Protein-protein interaction network among the suggestive causal proteins ( $P < 0.05$ ) and current multiple sclerosis medications targets**

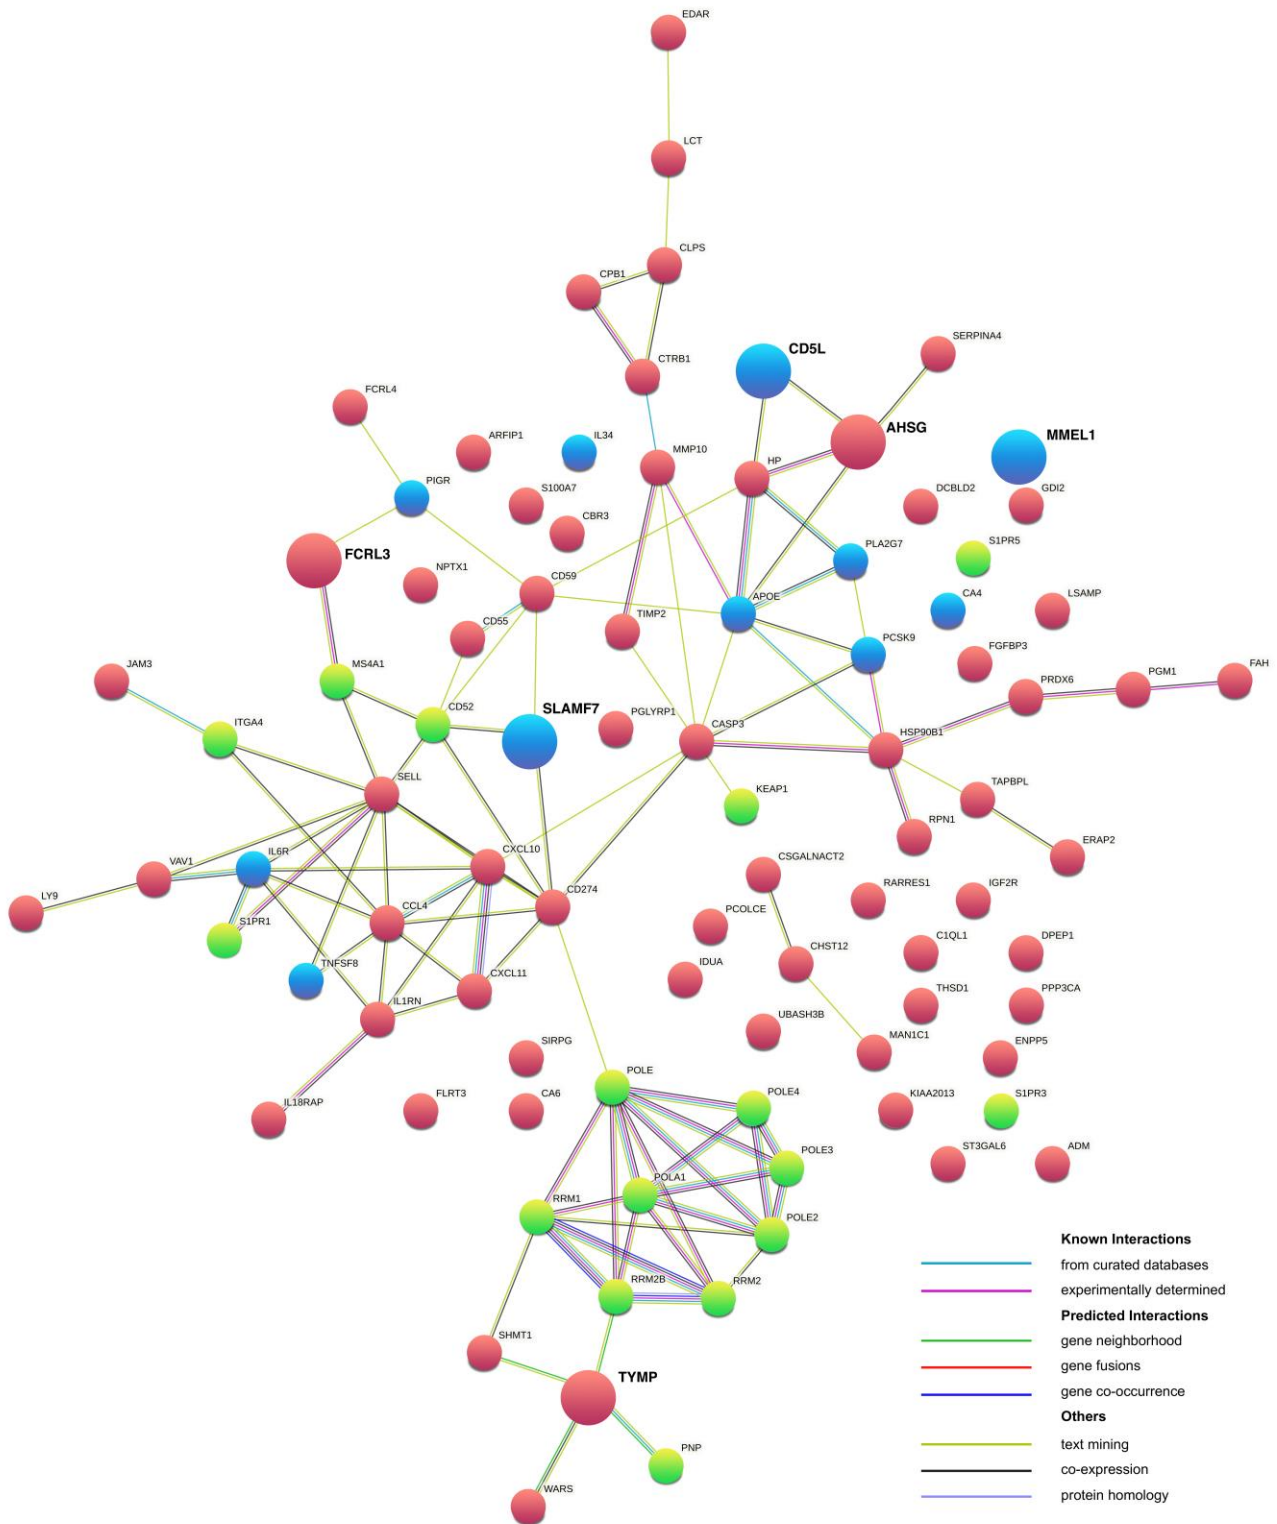

Red solid circles represented plasma proteins, blue solid circles represented represented CSF proteins, while green solid circles represented current MS medication targets. The largest solid circles highlighted six potential causal proteins, including FCRL3, TYMP, AHSG, MMEL1, SLAMF7, and CD5L.

**Supplementary Fig. 5 Protein-protein causal relationship among six potential causal proteins**

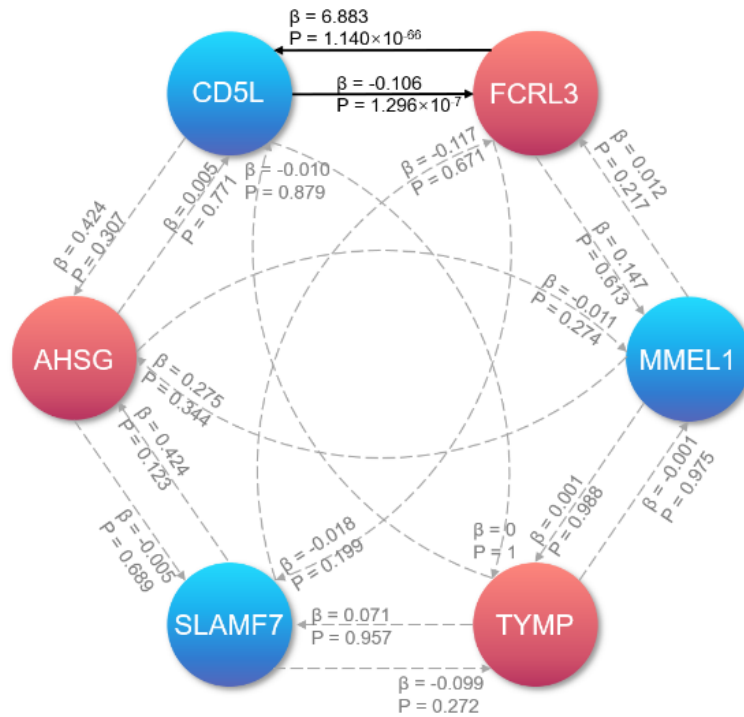

Red solid circles represented plasma proteins, while blue solid circles represented represented CSF proteins. Unit for plasma and CSF proteins were per standard deviation (SD) increase and per 10-fold increase.

**Supplementary Fig. 6 Protein-protein colocalization among six potential causal proteins**

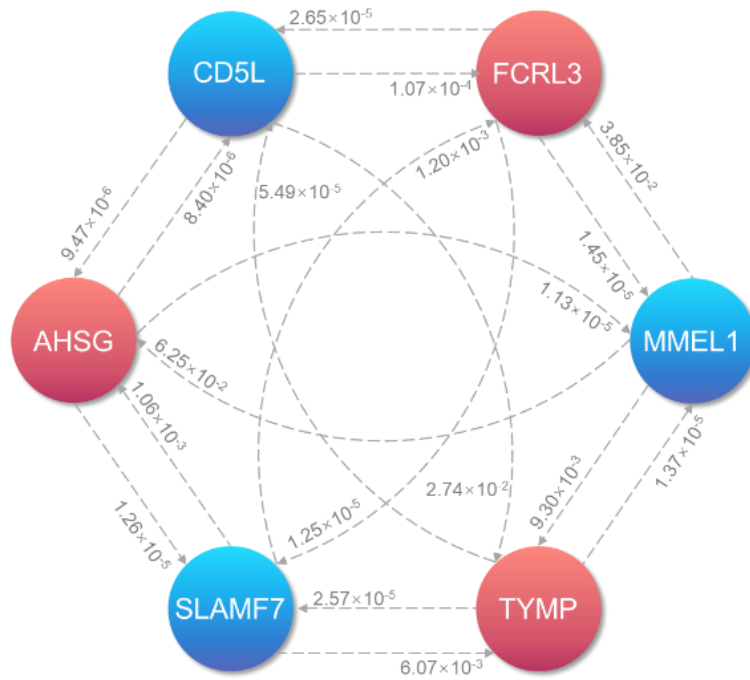

Numbers in figure represented posterior probability of two proteins colocalized (PPH<sub>4</sub>). PPH<sub>4</sub> greater than 0.8 strongly indicated colocalization. Red solid circles represented plasma proteins, while blue solid circles represented represented CSF proteins
